# Supplementary material for: Catalytic asymmetric transformation of nitrones and allenes to dihydropyridoindoles via chiral N,N′-dioxide/cobalt(ii) catalysis
Source: Royal Society of Chemistry journal article supplement (doi:10.1039/d2cc01263d), 2022-01-01

## Supporting Information

# Catalytic asymmetric transformation of nitrones and allenes to dihydropyridoindoles via chiral *N,N'*-dioxide/cobalt(II) catalysis

Mohuizi Liu, Lihua Xie, Houliuzhen, Lili Lin\* and Xiaoming Feng\*

Key Laboratory of Green Chemistry and Technology Ministry of Education, College of Chemistry,  
Sichuan University, Chengdu 610064 (China)

E-mail: liliilin@scu.edu.cn; xmfeng@scu.edu.cn.

## CONTENT

|                                                       |    |
|-------------------------------------------------------|----|
| 1. General information .....                          | 3  |
| 2. Procedures for the catalytic reaction.....         | 4  |
| 3. Optimization of reaction conditions .....          | 5  |
| 4. Limited substrates.....                            | 8  |
| 5. Analysis of 2D NMR spectra of the product 3z ..... | 8  |
| 6. Nonlinear effect.....                              | 9  |
| 7. Mechanism study .....                              | 10 |
| 8. X-ray crystallography .....                        | 13 |
| 9. Transformation of products .....                   | 14 |
| 10. Characterization of products .....                | 15 |
| 11. References .....                                  | 39 |
| 12. Copies of NMR spectra for products.....           | 40 |
| 13. Copies of CD spectra for products.....            | 78 |

## 1. General information

<sup>1</sup>H NMR spectra were recorded on commercial instruments (400 MHz or 600 MHz). Chemical shifts are reported in ppm from the tetramethylsilane with the solvent resonance as internal standard (CDCl<sub>3</sub>, δ = 77.0). Data were reported as follows: chemical shift, multiplicity (s = singlet, d = doublet, t = triplet, m = multiplet), coupling constants (Hz), integration. <sup>13</sup>C{<sup>1</sup>H} NMR data were collected on commercial instruments (101 MHz, 600MHz) with complete proton decoupling. <sup>19</sup>F{<sup>1</sup>H} NMR spectra were collected on commercial instruments (376 MHz) with complete proton decoupling. Melting points (M.p.) were determined using OptiMelt automated melting point system. High resolution mass spectra (HRMS) analyses were recorded on Thermo Scientific Q Exactive hybrid quadrupole-Orbitrap mass spectrometer (ESI Source) and methanol were used to dissolve the sample. Enantiomeric excesses (ee) were determined by UPC<sup>2</sup> analysis by using the corresponding commercial chiralpak column as stated in the experimental procedures at 25 °C with UV detector at 254 nm. Optical rotations were measured on a Rudolph Autopol V automatic polarimeter and are reported as follows:  $[\alpha]_D^{25} = (c = \text{g}/100 \text{ mL, in solvent})$ . IR spectra were recorded on Bruker TENSOR II IR spectrophotometer. Circular dichroism spectrum (CD) were recorded on Applied Photophysics Chirascan.

Unless otherwise indicated, reagents obtained from commercial sources were used without further purification. Solvents were dried and distilled prior to use according to the standard methods. Metal salts obtained from commercial sources were used without further purification. The chiral *N,N'*-dioxide ligands were synthesized by the same procedure in the literature.<sup>[1]</sup> The nitrones were prepared according to literature procedure.<sup>[2]</sup> The allenes were synthesized by following the literature procedure.<sup>[3]</sup>

## 2. Procedures for the catalytic reaction

### 2.1 General procedure for the preparation of the racemic products

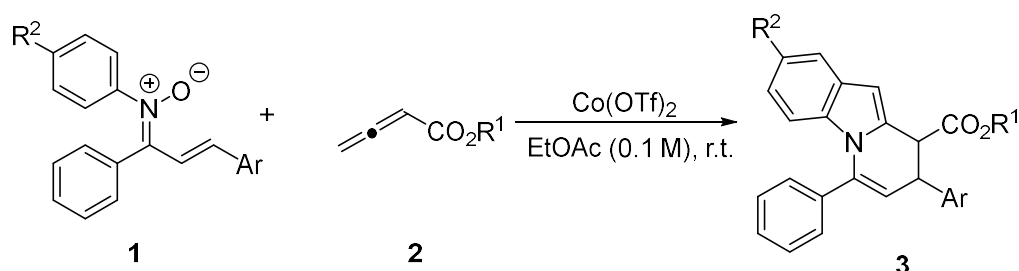

A dry reaction tube was charged with *N*-aryl nitron **1** (0.10 mmol), Co(OTf)<sub>2</sub> (3.6 mg, 0.01 mmol, 10 mol%), allene **2** (0.10 mmol) in EtOAc (1.0 mL) under argon atmosphere. The reaction mixture was stirred at 30 °C for 24 h. The desired product was purified directly by silica gel column chromatograph (ethyl acetate/petroleum ether, 50:1) to afford the corresponding product **3**.

### 2.2 General procedure for the catalytic asymmetric reaction

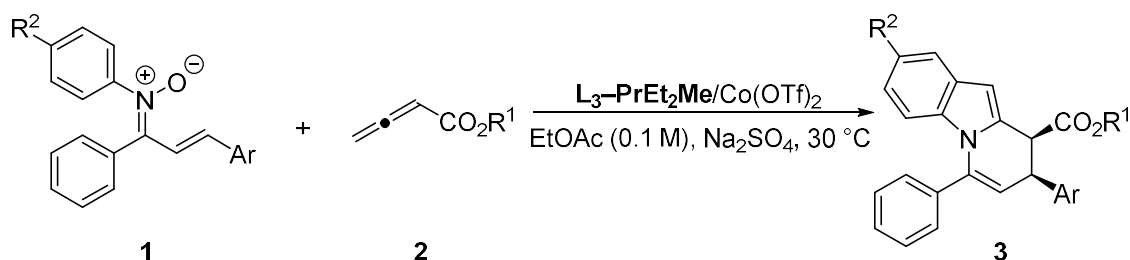

A dry reaction tube was charged with *N*-aryl nitron **1** (0.10 mmol), Co(OTf)<sub>2</sub>/L<sub>3</sub>-PrEt<sub>2</sub>Me (10 mol%, 1.2:1), allene **2** (0.10 mmol), Na<sub>2</sub>SO<sub>4</sub> (20 mg) in EtOAc (1.0 mL) under argon atmosphere. The reaction mixture was stirred at 30 °C for 24 h. The desired product was purified directly by silica gel column chromatograph (ethyl acetate/petroleum ether, 50:1) to afford the corresponding product **3**.

### 2.3 Experimental procedure for the scale-up synthesis of **3o**

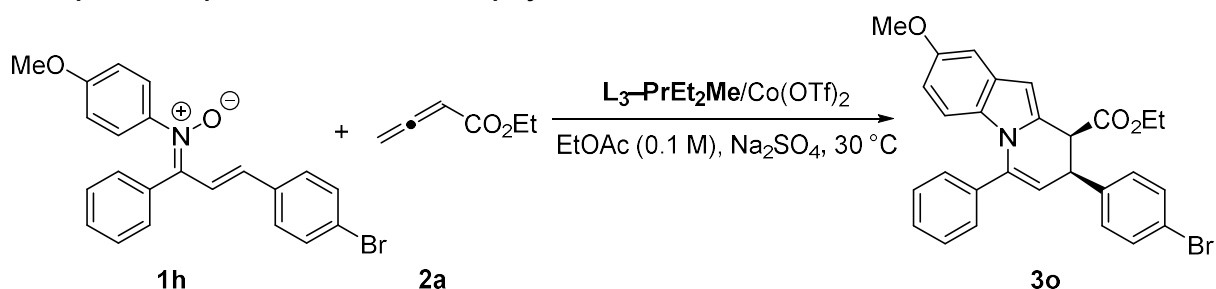

A dry reaction tube was charged with *N*-aryl nitron **1h** (3.5 mmol, 1.42 g), Co(OTf)<sub>2</sub>/L<sub>3</sub>-PrEt<sub>2</sub>Me (10 mol%, 1.2:1), allene **2a** (3.5 mmol, 0.39 mL), Na<sub>2</sub>SO<sub>4</sub> (0.70 g) in EtOAc (35.0 mL) under argon atmosphere. The reaction mixture was stirred at 30 °C for 24 h. The desired product was purified directly by silica gel column chromatograph (ethyl acetate/petroleum ether, 50:1) to afford the corresponding product **3o** (1.15 g, 65% yield, 98:2 dr, 98% ee).

### 3. Optimization of reaction conditions

#### 3.1 Screening of metal salts

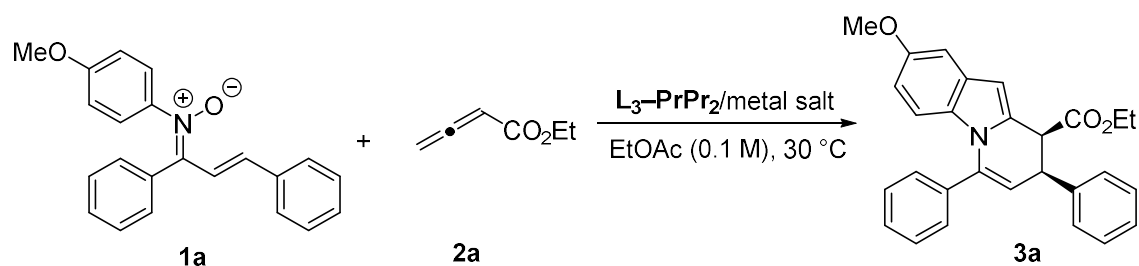

| entry <sup>[a]</sup> | metal salt                                            | yield (%) <sup>[b]</sup> | dr <sup>[c]</sup> | ee (%) <sup>[c]</sup> |
|----------------------|-------------------------------------------------------|--------------------------|-------------------|-----------------------|
| 1                    | Sc(OTf) <sub>3</sub>                                  | 24                       | 95:5              | race                  |
| 2                    | Mg(OTf) <sub>2</sub>                                  | 51                       | 92:8              | 76/9                  |
| 3                    | Co(OTf) <sub>2</sub>                                  | 61                       | 90:10             | 87/33                 |
| 4                    | Ni(OTf) <sub>2</sub>                                  | 50                       | 86:14             | 90/50                 |
| 5                    | Cu(OTf) <sub>2</sub>                                  | 25                       | 74:26             | 37/12                 |
| 6                    | Zn(OTf) <sub>2</sub>                                  | 31                       | 94:6              | 86/35                 |
| 7                    | Fe(OTf) <sub>2</sub>                                  | 28                       | 90:10             | 2/3                   |
| 8                    | La(OTf) <sub>3</sub>                                  | 60                       | 95:5              | -30                   |
| 9                    | Co(NTf <sub>2</sub> ) <sub>2</sub>                    | 51                       | 88:12             | 89/47                 |
| 10                   | Co(ClO <sub>4</sub> ) <sub>2</sub> ·6H <sub>2</sub> O | 58                       | 86:14             | 61/53                 |
| 11                   | Co(BF <sub>4</sub> ) <sub>2</sub> ·6H <sub>2</sub> O  | 56                       | 89:11             | 81/37                 |

[a] Unless otherwise noted, all reactions were carried out with **1a** (0.10 mmol), **2a** (0.10 mmol), and metal salt/ $L_3\text{-PrPr}_2$  (1:1, 10 mol%) in EtOAc (1.0 mL) under argon atmosphere at 30 °C for 24 h. [b] Isolated yield of **3a**. [c] Determined by UPC<sup>2</sup> analysis on a chiral stationary.

#### 3.2 Screening of ligands

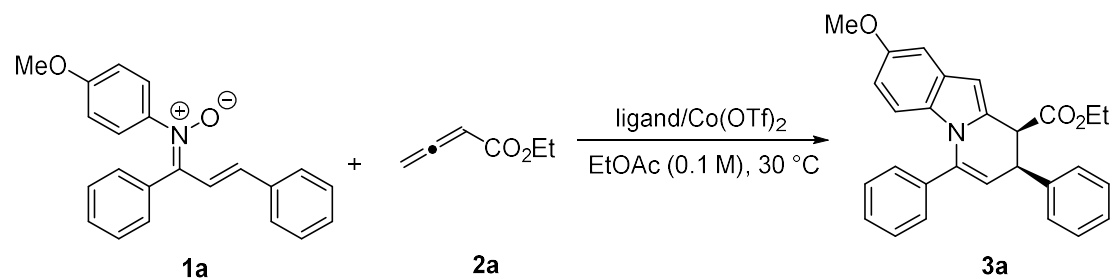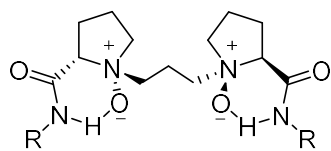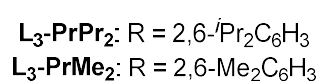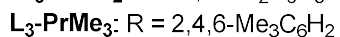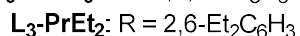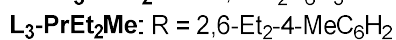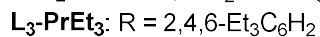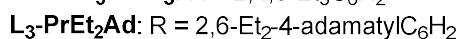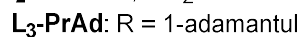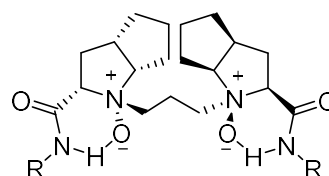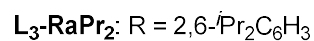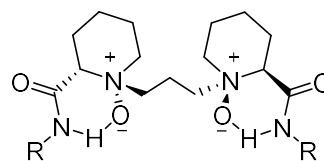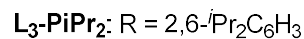

| entry <sup>[a]</sup> | ligand                                  | yield (%) <sup>[b]</sup> | dr <sup>[c]</sup> | ee (%) <sup>[c]</sup> |
|----------------------|-----------------------------------------|--------------------------|-------------------|-----------------------|
| 1                    | <b>L<sub>3</sub>-PiPr<sub>2</sub></b>   | 59                       | 83:17             | 92/83                 |
| 2                    | <b>L<sub>3</sub>-RaPr<sub>2</sub></b>   | 53                       | 84:16             | 91/56                 |
| 3                    | <b>L<sub>3</sub>-PrPr<sub>2</sub></b>   | 61                       | 90:10             | 87/41                 |
| 4                    | <b>L<sub>3</sub>-PrMe<sub>2</sub></b>   | 59                       | 93:7              | 90/77                 |
| 5                    | <b>L<sub>3</sub>-PrMe<sub>3</sub></b>   | 61                       | 92:8              | 98/89                 |
| 6                    | <b>L<sub>3</sub>-PrEt<sub>2</sub></b>   | 55                       | 95:5              | 99                    |
| 7                    | <b>L<sub>3</sub>-PrEt<sub>2</sub>Me</b> | 67                       | 95:5              | 97                    |
| 8                    | <b>L<sub>3</sub>-PrEt<sub>3</sub></b>   | 60                       | 97:3              | 99                    |
| 9                    | <b>L<sub>3</sub>-PrEt<sub>2</sub>Ad</b> | 61                       | 96:4              | 99                    |
| 10                   | <b>L<sub>3</sub>-PrAd</b>               | 58                       | 95:5              | 30/40                 |

[a] Unless otherwise noted, all reactions were carried out with **1a** (0.10 mmol), **2a** (0.10 mmol), and Co(OTf)<sub>2</sub>/ligand (1:1, 10 mol%) in EtOAc (1.0 mL) under argon atmosphere at 30 °C for 24 h. [b] Isolated yield of **3a**. [c] Determined by UPC<sup>2</sup> analysis on a chiral stationary.

### 3.3 Screening of solvents

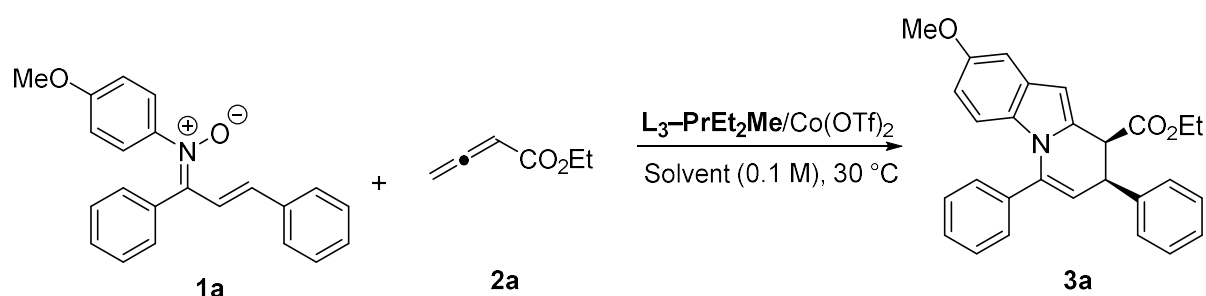

| entry <sup>[a]</sup> | solvent                             | yield (%) <sup>[b]</sup> | dr <sup>[c]</sup> | ee (%) <sup>[c]</sup> |
|----------------------|-------------------------------------|--------------------------|-------------------|-----------------------|
| 1                    | Et <sub>2</sub> O                   | 62                       | 88:12             | 91/79                 |
| 2                    | CH <sub>2</sub> Cl <sub>2</sub>     | 65                       | 85:15             | 96/49                 |
| 3                    | THF                                 | 70                       | 96:4              | 83                    |
| 4                    | PhCH <sub>3</sub>                   | 57                       | 88:12             | 92/77                 |
| 5                    | HCOOCH <sub>2</sub> CH <sub>3</sub> | 52                       | 95:5              | 45/31                 |
| 6                    | CH <sub>3</sub> COOCH <sub>3</sub>  | 53                       | 94:6              | 97/69                 |
| 7                    | EtOAc                               | 67                       | 95:5              | 97                    |
| 8                    | HCOOCH <sub>3</sub>                 | 62                       | 91:9              | 89/53                 |

[a] Unless otherwise noted, all reactions were carried out with **1a** (0.10 mmol), **2a** (0.10 mmol), and Co(OTf)<sub>2</sub>/**L<sub>3</sub>-PrEt<sub>2</sub>Me** (1:1, 10 mol%) in solvent (1.0 mL) under argon atmosphere at 30 °C for 24 h. [b] Isolated yield of **3a**. [c] Determined by UPC<sup>2</sup> analysis on a chiral stationary.

### 3.4 Screening of temperature

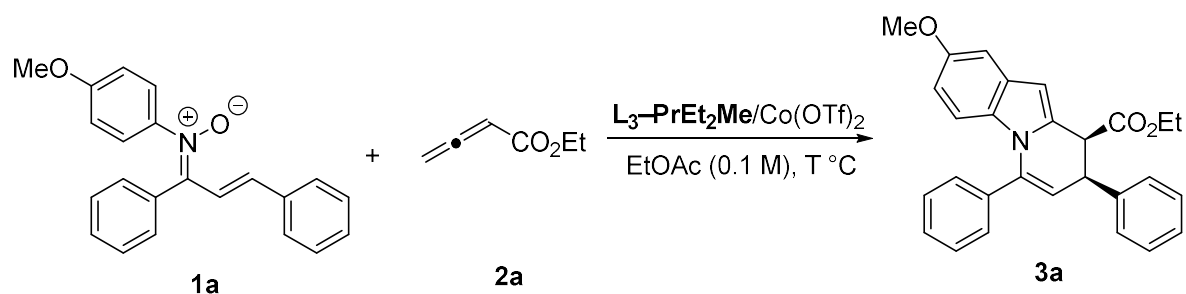

| entry <sup>[a]</sup> | T (°C) | yield (%) <sup>[b]</sup> | dr <sup>[c]</sup> | ee (%) <sup>[c]</sup> |
|----------------------|--------|--------------------------|-------------------|-----------------------|
| 1                    | 0      | 27                       | 97                | 95:5                  |

|   |    |    |       |      |
|---|----|----|-------|------|
| 2 | 20 | 53 | 98    | 95:5 |
| 3 | 30 | 67 | 97    | 95:5 |
| 4 | 40 | 69 | 97/70 | 93:7 |
| 5 | 60 | 67 | 96/79 | 91:9 |

[a] Unless otherwise noted, all reactions were carried out with **1a** (0.10 mmol), **2a** (0.10 mmol), and  $\text{Co}(\text{OTf})_2/\text{L}_3\text{-PrEt}_2\text{Me}$  (1:1, 10 mol%) in EtOAc (1.0 mL) under argon atmosphere at T °C for 24 h. [b] Isolated yield of **3a**. [c] Determined by UPC<sup>2</sup> analysis on a chiral stationary.

### 3.5 Screening of the ratio of metal to ligand

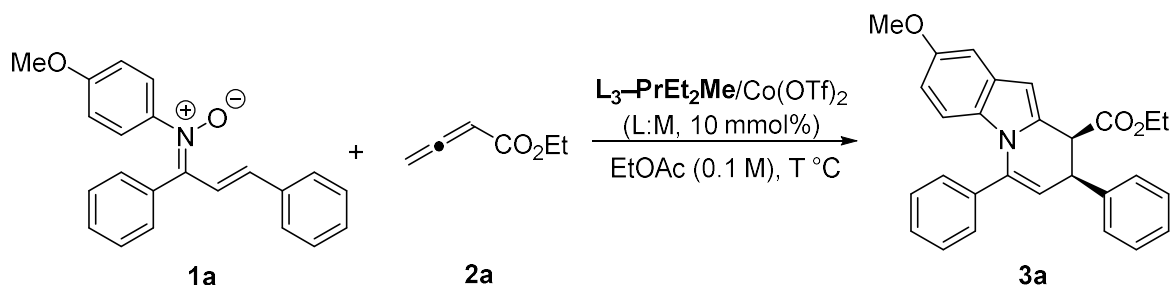

| entry <sup>[a]</sup> | L:M   | yield (%) <sup>[b]</sup> | dr <sup>[c]</sup> | ee (%) <sup>[c]</sup> |
|----------------------|-------|--------------------------|-------------------|-----------------------|
| 1                    | 1:1   | 67                       | 95:5              | 97                    |
| 2                    | 1.2:1 | 47                       | 97:3              | 99                    |
| 3                    | 1.5:1 | 44                       | 98:2              | 99                    |
| 4                    | 1:1.2 | 72                       | 95:5              | 97                    |
| 5                    | 1:1.5 | 74                       | 90:10             | 67/30                 |
| 6                    | 1:2   | 74                       | 86:14             | 35/12                 |

[a] Unless otherwise noted, all reactions were carried out with **1a** (0.10 mmol), **2a** (0.10 mmol) and  $\text{L}_3\text{-PrEt}_2\text{Me}/\text{Co}(\text{OTf})_2$  (L:M, 10 mol%) in EtOAc (1 mL) under argon atmosphere at 30 °C for 24 h. [b] Isolated yield **3a**. [c] Determined by UPC<sup>2</sup> analysis on a chiral stationary.

### 3.6 Screening of additives

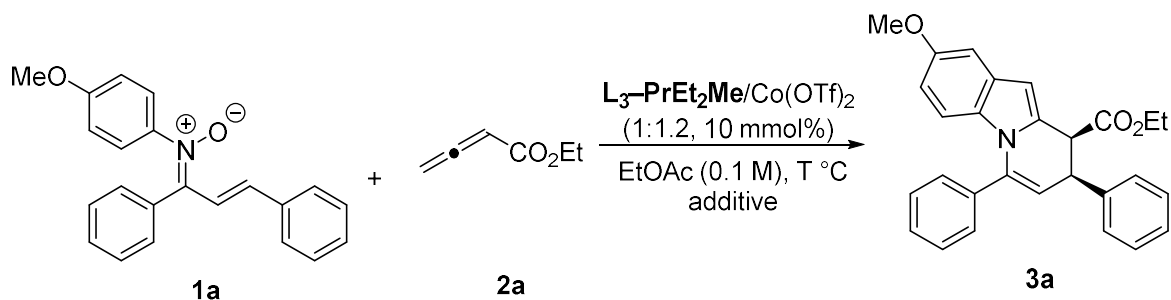

| entry <sup>[a]</sup> | Additive                         | yield (%) <sup>[b]</sup> | dr <sup>[c]</sup> | ee (%) <sup>[c]</sup> |
|----------------------|----------------------------------|--------------------------|-------------------|-----------------------|
| 1                    | 3 Å MS (20 mg)                   | 31                       | 95:5              | 97                    |
| 2                    | 4 Å MS (20 mg)                   | 31                       | 95:5              | 97                    |
| 3                    | 5 Å MS (20 mg)                   | 32                       | 95:5              | 97                    |
| 4                    | $\text{Na}_2\text{SO}_4$ (20 mg) | 79                       | 95:5              | 97                    |
| 5                    | $\text{Na}_2\text{SO}_4$ (40 mg) | 79                       | 95:5              | 97                    |
| 6                    | $\text{Na}_2\text{SO}_4$ (60 mg) | 79                       | 95:5              | 97                    |

[a] Unless otherwise noted, all reactions were carried out with **1a** (0.10 mmol), **2a** (0.10 mmol),  $\text{Co}(\text{OTf})_2/\text{L}_3\text{-PrEt}_2\text{Me}$  (1.2:1, 10 mol%) and additive in EtOAc (1 mL) under argon atmosphere at 30 °C for 24 h. [b] Isolated yield **3a**. [c] Determined by UPC<sup>2</sup> analysis on a chiral stationary.

#### 4. Limited substrates

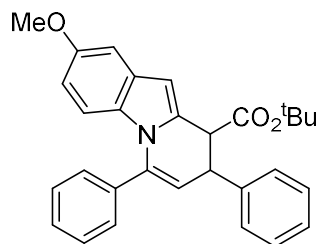

yield = 51%  
ee = 57%/93%, dr = 60:40

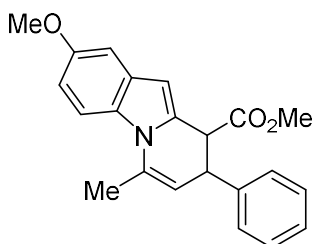

yield = 19%,  
race, dr = 88:12

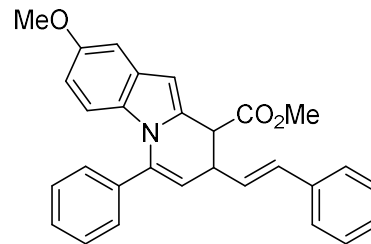

yield = 54%  
ee = 90%/63%, dr = 78:22

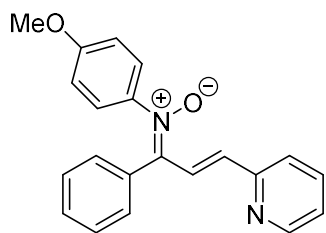

complex

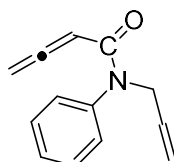

complex

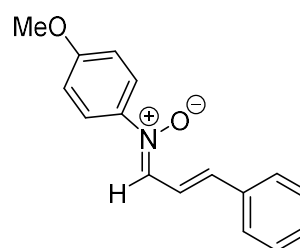

N.D.

#### 5. Analysis of 2D NMR spectra of the product 3z

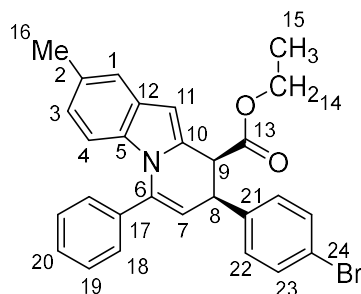

| Number of Atom | H    | C     | Number of Atom | H         | C     |
|----------------|------|-------|----------------|-----------|-------|
| 1              | 6.71 | 123.3 | 13             | -         | 169.4 |
| 2              | -    | 129.7 | 14             | 4.05      | 60.8  |
| 3              | 7.33 | 120.5 | 15             | 1.14      | 14.0  |
| 4              | 6.69 | 104.2 | 16             | 2.38      | 21.3  |
| 5              | -    | -     | 17             | -         | 135.9 |
| 6              | -    | 139.4 | 18-20          | 7.42-7.50 | 128.1 |
| 7              | 5.58 | 112.3 |                |           | 128.5 |
| 8              | 4.18 | 41.7  |                |           | 128.8 |
| 9              | 4.37 | 46.6  | 21             | -         | 138.7 |
| 10             | -    | -     | 22             | 6.88-6.96 | 129.9 |
| 11             | 6.13 | 112.7 | 23             | 7.31-7.38 | 131.5 |
| 12             | -    | -     | 24             | -         | -     |



## 6. Nonlinear effect

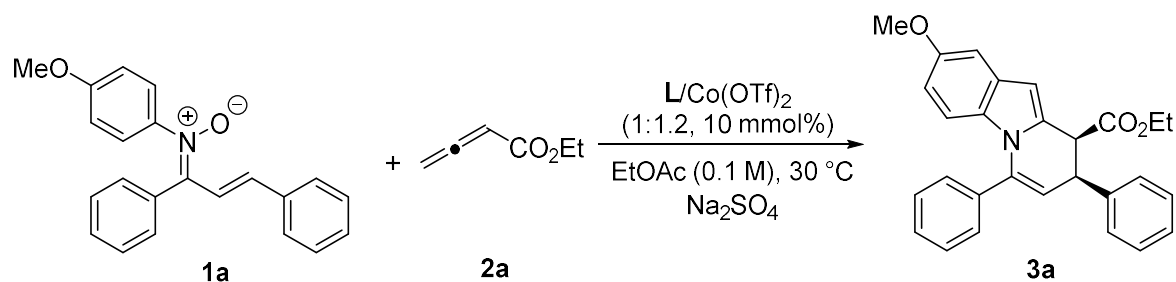

A dry reaction tube was charged with *N*-aryl nitron **1a** (0.10 mmol),  $Co(OTf)_2/L$  (10 mol%, 1.2:1), allene **2a** (0.10 mmol),  $Na_2SO_4$  (20 mg) in EtOAc (1.0 mL) under argon atmosphere. The reaction mixture was stirred at 30 °C for 24 h. The desired product was purified directly by silica gel column chromatograph (ethyl acetate/petroleum ether, 50:1) to afford the corresponding product **3a**.

| Entry <sup>[a]</sup> | ee of catalyst <b>L</b> (%) | ee of product <sup>[b]</sup> |
|----------------------|-----------------------------|------------------------------|
| 1                    | 0                           | 0                            |
| 2                    | 20                          | 27                           |
| 3                    | 40                          | 41                           |
| 4                    | 60                          | 66                           |
| 5                    | 80                          | 79                           |
| 6                    | 100                         | 97                           |

[a] Unless otherwise noted, all reactions were carried out with **1a** (0.10 mmol), **2a** (0.10 mmol),  $Co(OTf)_2/L$  (1.2:1, 10 mol%) and  $Na_2SO_4$  (20 mg) in EtOAc (1 mL) under argon atmosphere at 30 °C for 24 h. [b] Determined by UPC<sup>2</sup> analysis on a chiral stationary.

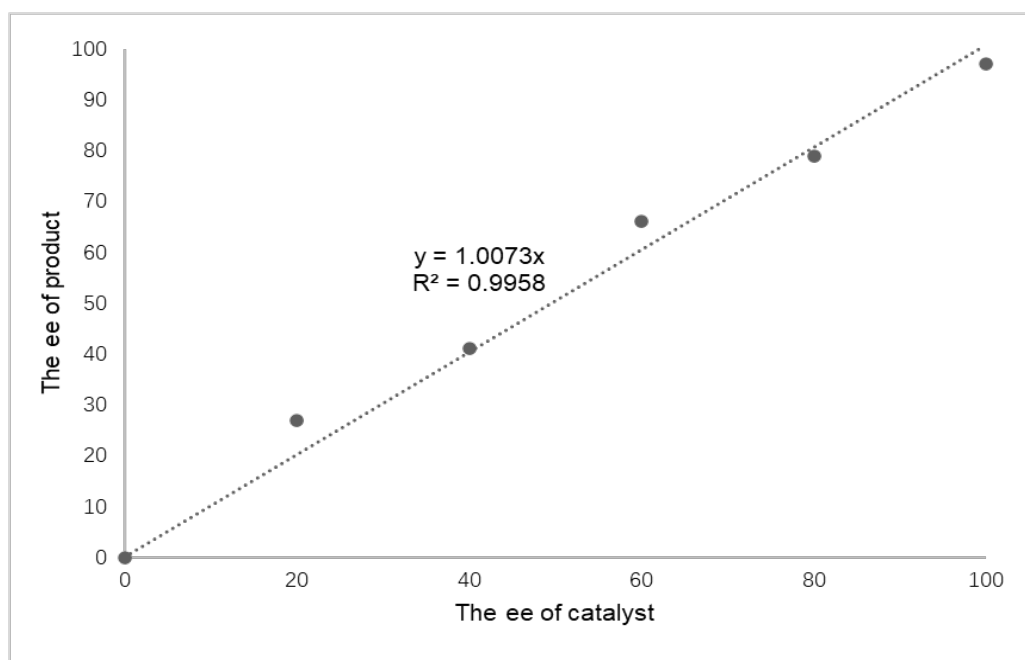

## 7. Mechanism study

### 7.1 Trace the reaction by <sup>1</sup>H NMR analysis

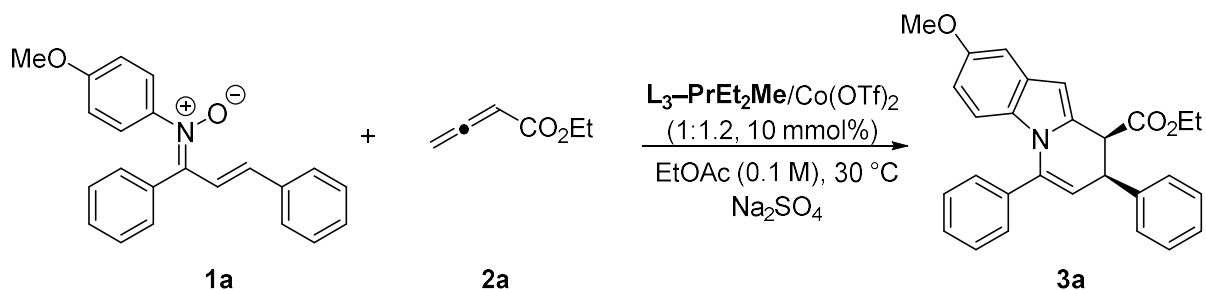

A dry reaction tube was charged with *N*-aryl nitronium **1a** (0.10 mmol), Co(OTf)<sub>2</sub>/L (10 mol%, 1.2:1), allene **2a** (0.10 mmol), Na<sub>2</sub>SO<sub>4</sub> (20 mg) in EtOAc (1.0 mL) under argon atmosphere. The reaction mixture was stirred at 30 °C for x h, and filtered with suction. The yield was determined by <sup>1</sup>H NMR. (<sup>1</sup>H NMR see SI control experiment <sup>1</sup>H NMR, CH<sub>2</sub>Br<sub>2</sub> as the internal standard solvent)

| Entry <sup>[a]</sup> | T/h | Yield <sup>[b]</sup> |
|----------------------|-----|----------------------|
| 1                    | 0   | 0                    |
| 2                    | 1   | 1                    |
| 3                    | 2   | 1                    |
| 4                    | 3   | 1                    |
| 5                    | 4   | 9                    |
| 6                    | 5   | 14                   |

[a] Unless otherwise noted, all reactions were carried out with **1a** (0.10 mmol), **2a** (0.10 mmol), Co(OTf)<sub>2</sub>/L (1.2:1, 10 mol%) and Na<sub>2</sub>SO<sub>4</sub> (20 mg) in EtOAc (1 mL) under argon atmosphere at 30 °C for T h. [b] Determined by <sup>1</sup>H NMR.

### 7.2 Operando IR experiments

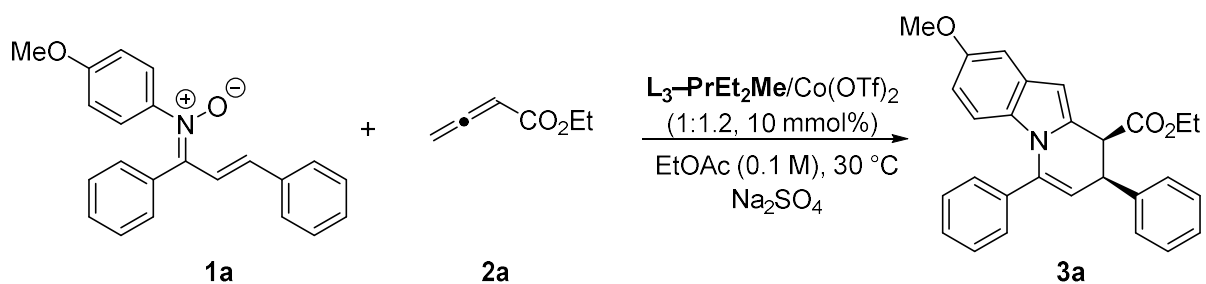

Initially, the infrared absorption spectra of each reactant (**1a**, **2a**) and product **3a** in EtOAc were collected. The following figure shows the absorption of each participant minus the absorption of solvent.

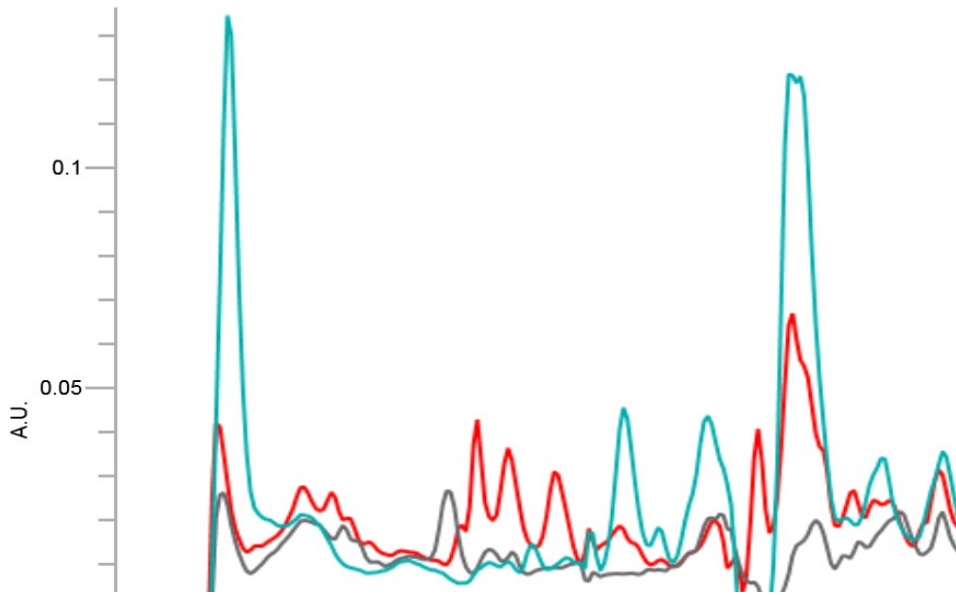

| Spectrum Name    | Color                                | Units |
|------------------|--------------------------------------|-------|
| 3a minus EA      | <span style="color: red;">—</span>   | A.U.  |
| 1a-2 minus 1a EA | <span style="color: black;">—</span> | A.U.  |
| 2a-2 minus 1a EA | <span style="color: cyan;">—</span>  | A.U.  |

Figure1. The IR spectra of each component.

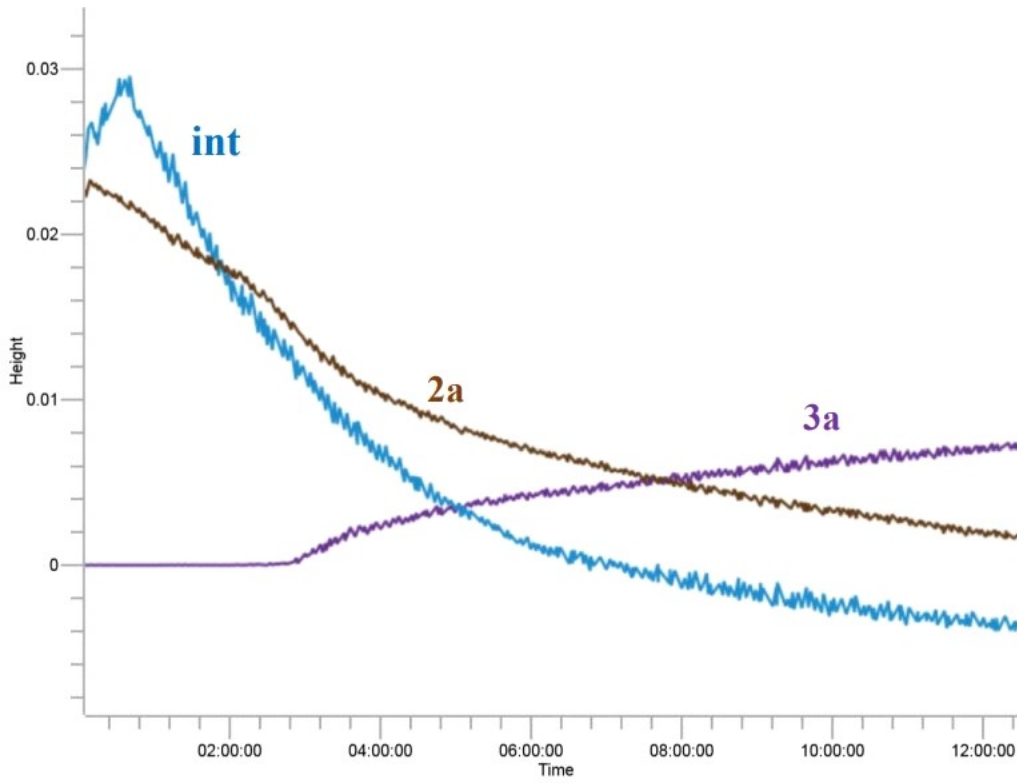

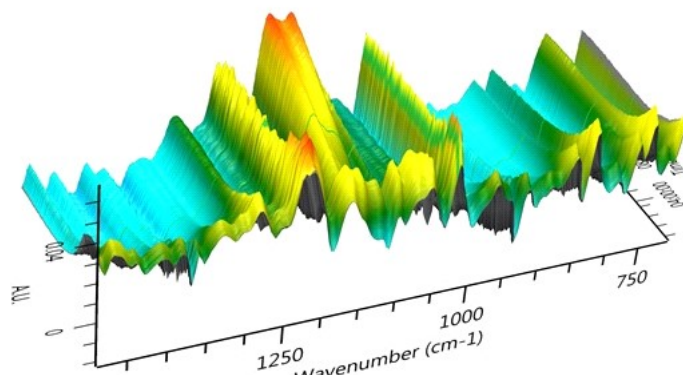

| Trend             | Color                                                                             | Units  |
|-------------------|-----------------------------------------------------------------------------------|--------|
| Peak at 1446 cm-1 |  | Height |
| Peak at 1413 cm-1 |  | Height |
| Peak at 1504 cm-1 |  | Height |

Figure 2. 3D ATR-FTIR profile of the catalytic asymmetric cascade reaction of each component.

The Operando IR experiments is consistent with the  $^1\text{H}$  NMR experiment. There is basically no product formed in 3 hours. A newly absorption peak increased first and then decreased before and after adding the substrate **1a**. These implied that this newly generated species could be the intermediate.

## 8. X-ray crystallography of 3z

The colourless crystal in block-shape, with approximate dimensions of  $0.136 \times 0.165 \times 0.511 \text{ mm}^3$ , was selected and mounted for the single-crystal X-ray diffraction. The data set was collected by Bruker D8 Venture Photon II diffractometer at 173(2)K equipped with micro-focus Mo radiation source ( $K_{\alpha} = 0.71073\text{\AA}$ ). Applied with face-indexed numerical absorption correction, the structure solution was solved and refinement was processed by SHELXTL (version 6.14) and OLEX 2.3 program package<sup>a, b, c, d</sup>. The structure was analyzed by ADDSYM routine implemented in PLATON suite and no higher symmetry was suggested<sup>e</sup>.

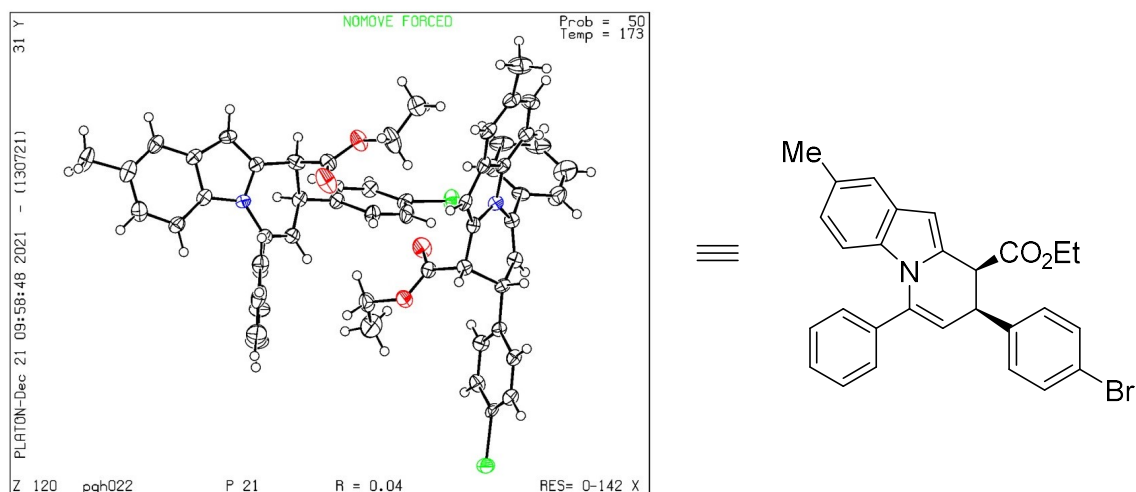

### Crystallographic Data for $\text{C}_{56}\text{H}_{48}\text{Br}_2\text{N}_2\text{O}_4$ .

|                                                   |                                                             |
|---------------------------------------------------|-------------------------------------------------------------|
| Formula                                           | $\text{C}_{56}\text{H}_{48}\text{Br}_2\text{N}_2\text{O}_4$ |
| Formula mass (amu)                                | 972.78                                                      |
| Space group                                       | P 21                                                        |
| <i>a</i> (Å)                                      | 11.505(3)                                                   |
| <i>b</i> (Å)                                      | 8.2528(15)                                                  |
| <i>c</i> (Å)                                      | 24.175(5)                                                   |
| $\alpha$ (deg)                                    | 90                                                          |
| $\beta$ (deg)                                     | 92.468(6)                                                   |
| $\gamma$ (deg)                                    | 90                                                          |
| <i>V</i> (Å <sup>3</sup> )                        | 2293.3(8)                                                   |
| <i>Z</i>                                          | 2                                                           |
| $\lambda$ (Å)                                     | 0.71073                                                     |
| <i>T</i> (K)                                      | 173 K                                                       |
| $\rho_{\text{calcd}}$ (g cm <sup>-3</sup> )       | 1.409                                                       |
| $\mu$ (mm <sup>-1</sup> )                         | 1.818                                                       |
| Transmission factors                              | 0.605, 0.985                                                |
| $\theta_{\text{max}}$ (deg)                       | 26.414                                                      |
| No. of unique data, including $F_o^2 < 0$         | 9150                                                        |
| No. of unique data, with $F_o^2 > 2\sigma(F_o^2)$ | 7256                                                        |
| No. of variables                                  | 581                                                         |

|                                                  |        |
|--------------------------------------------------|--------|
| $R(F)$ for $F_o^2 > 2\sigma(F_o^2)$ <sup>a</sup> | 0.0428 |
| $R_w(F_o^2)$ <sup>b</sup>                        | 0.1093 |
| Goodness of fit                                  | 1.006  |

$$^a R(F) = \frac{\sum ||F_o| - |F_c||}{\sum |F_o|}$$

$$^b R_w(F_o^2) = \frac{[\sum [w(F_o^2 - F_c^2)^2] / \sum wF_o^4]^{1/2}}{w^{-1} = [\sigma^2(F_o^2) + (Ap)^2 + Bp]}, \text{ where } p = [\max(F_o^2, 0) + 2F_c^2] / 3.$$

#### References:

<sup>a</sup> Sheldrick, G. M. *Acta Cryst.* **2008**, *A64*, 112–122.

<sup>b</sup> Sheldrick, G. M. *Acta Cryst.* **2015**, *A71*, 3–8.

<sup>c</sup> Sheldrick, G. M. *Acta Cryst.* **2015**, *C71*, 3–8.

<sup>d</sup> Dolomanov, O.V., Bourhis, L.J., Gildea, R.J., Howard, J. A. K., Puschmann, H. *J. Appl. Cryst.* **2009**, *42*, 339–341.

<sup>e</sup> Spek, A. L. *J. Appl. Cryst.* **2003**, *36*, 7–13.

## 9. Transformation of products

### 9.1 Reduction of 3a

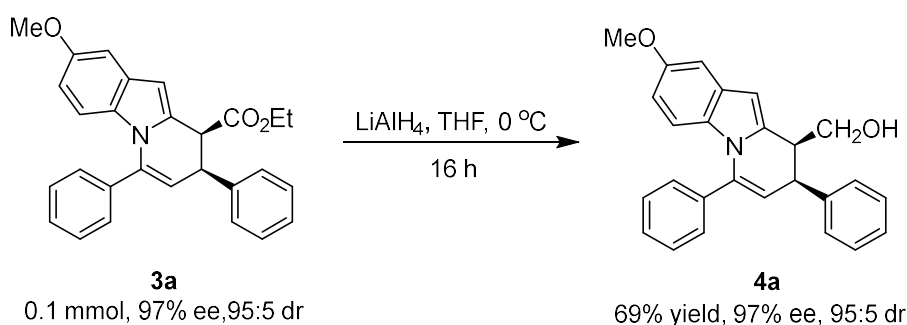

Synthesis of **4a**: A dry reaction tube was charged with **3a** (42.3 mg, 0.1 mmol, 97% ee, 95:5 dr) in anhydrous THF (1.0 mL). The mixture was stirred at 0 °C for 10 min. Then LiAlH<sub>4</sub> (8.4 mg, 0.22 mmol, 2.2 equiv) was added at 0 °C and stirred at 0 °C for 12 hours. After the reaction was completed, the mixture was extracted with ethyl acetate. The combined organics were dried and concentrated in vacuo. The residue was subjected to column chromatography on silica gel and eluted with petroleum ether/ethyl acetate (50/1 and 2/1, v/v) to afford the product **4a** (2.63 mg, 69% yield, 97% ee, 95:5 dr).

### 9.2 Epimerization of 3b

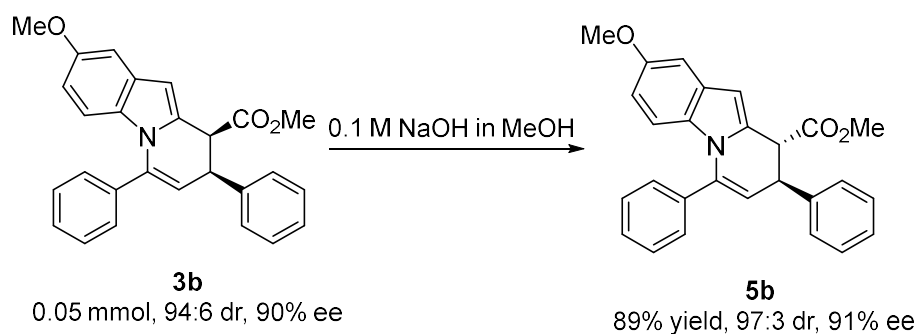

A dry reaction tube was charged with *syn*-dihydropyridoindole **3b** (0.05 mmol, 0.204 g), and then a 0.1 M solution of NaOH in MeOH (0.11 mL, 0.010 mmol) was added to the reaction tube. The reaction mixture was stirred at 25 °C for 1 h. The reaction mixture was then diluted with CH<sub>2</sub>Cl<sub>2</sub> (10.0 mL), washed with brine (3 x 5.0 mL), and dried with Na<sub>2</sub>SO<sub>4</sub>. The CH<sub>2</sub>Cl<sub>2</sub> solution was then concentrated under vacuum and purified directly by silica gel column chromatograph (ethyl acetate/petroleum ether, 50:1) to afford the corresponding product **5b** (0.0182 g, 89% yield, 97:3 dr, 91% ee).

## 10. Characterization of Typical Products

Ethyl (8*S*,9*S*)-2-methoxy-6,8-diphenyl-8,9-dihydropyrido[1,2-*a*]indole-9-carboxylate **3a**

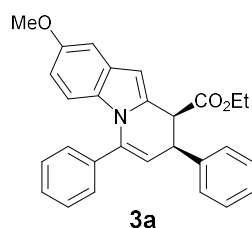

Yellow oil; *R*<sub>f</sub> = 0.6 (petroleum ether/ethyl acetate = 6/1), 79% yield, 97% ee, 95:5 dr. [α]<sub>D</sub><sup>25</sup> = +32.6 (c = 0.60, in CH<sub>2</sub>Cl<sub>2</sub>, λ = 589 nm).

Dissolved in *i*PrOH for UPC<sup>2</sup>; UPC<sup>2</sup> (Daicel CHIRALPAK OJ-3, CO<sub>2</sub>/CH<sub>3</sub>OH = 80/20, flow rate = 1.5 mL/min, λ = 254 nm) retention time: *t*<sub>1</sub> = 2.94 min, *t*<sub>2</sub> = 4.18 min, *t*<sub>3</sub> = 5.93 min, *t*<sub>4</sub> = 9.02 min. dr = 95:5 determined by <sup>1</sup>H NMR.

**<sup>1</sup>H NMR** (400 MHz, Chloroform-*d*) δ = 7.50 – 7.42 (m, 5H), 7.31 – 7.19 (m, 3H), 7.10 – 7.06 (m, 2H), 7.01 (d, *J* = 2.6 Hz, 1H), 6.65 (s, 1H), 6.52 (dd, *J* = 9.1, 2.6 Hz, 1H), 6.14 (d, *J* = 9.1 Hz, 1H), 5.62 (d, *J* = 4.8 Hz, 1H), 4.35 (d, *J* = 6.0 Hz, 1H), 4.27 – 4.18 (m, 1H), 4.04 – 3.95 (m, 2H), 3.79 (s, 3H), 1.07 (t, *J* = 7.2 Hz, 3H) ppm.

**<sup>13</sup>C{<sup>1</sup>H} NMR** (101 MHz, Chloroform-*d*) δ = 169.5, 154.3, 139.6, 139.0, 136.1, 133.6, 129.9, 129.6, 128.7, 128.5, 128.5, 128.2, 128.1, 127.3, 113.7, 112.7, 111.2, 103.9, 102.7, 60.7, 55.7, 47.0, 42.3, 14.0 ppm.

**IR** (neat): 3066, 3034, 2983, 2933, 2838, 1730, 1646, 1615, 1476, 1446, 1399, 1265, 1171, 1032, 843, 735 *ν* (cm<sup>-1</sup>)

**HRMS** (ESI-FT) calcd for C<sub>28</sub>H<sub>26</sub>NO<sub>3</sub><sup>+</sup> ([M]+H<sup>+</sup>) = 424.1907, found 424.1902.

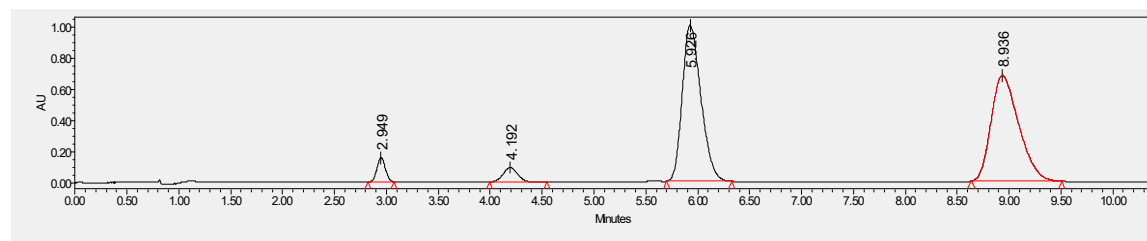

|   | Retention Time | Area     | % Area |
|---|----------------|----------|--------|
| 1 | 2.949          | 879453   | 3.27   |
| 2 | 4.192          | 880199   | 3.27   |
| 3 | 5.926          | 12540832 | 46.63  |
| 4 | 8.936          | 12593192 | 46.83  |

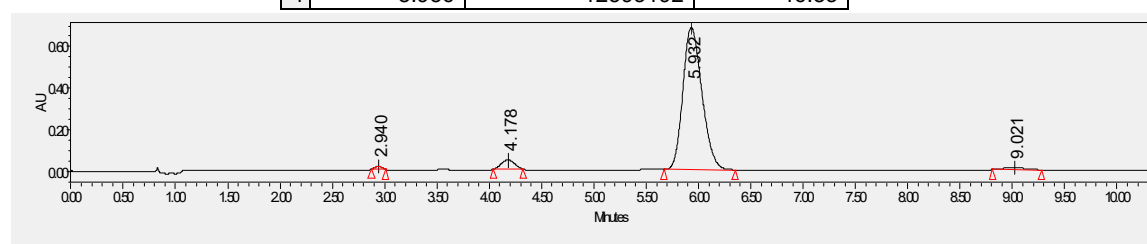

|   | Retention Time | Area    | % Area |
|---|----------------|---------|--------|
| 1 | 2.940          | 61386   | 0.66   |
| 2 | 4.178          | 386882  | 4.18   |
| 3 | 5.932          | 8657185 | 93.62  |

|   |       |        |      |
|---|-------|--------|------|
| 4 | 9.021 | 141881 | 1.53 |
|---|-------|--------|------|

Methyl (8*S*,9*S*)-2-methoxy-6,8-diphenyl-8,9-dihydropyrido[1,2-*a*]indole-9-carboxylate **3b**

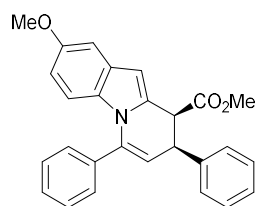

**3b**

Yellow oil;  $R_f = 0.6$  (petroleum ether/ethyl acetate = 6/1), 74% yield, 90% ee, 95:5 dr.  $[\alpha]_D^{25} = +34.5$  ( $c = 0.56$ , in  $\text{CH}_2\text{Cl}_2$ ,  $\lambda = 589$  nm).

Dissolved in *i*PrOH for UPC<sup>2</sup>; UPC<sup>2</sup> (Daicel CHIRALPAK OJ-3,  $\text{CO}_2/\text{CH}_3\text{OH} = 80/20$ , flow rate = 1.5 mL/min,  $\lambda = 254$  nm) retention time:  $t_1 = 3.81$  min,  $t_2 = 5.92$  min,  $t_3 = 9.14$  min,  $t_4 = 14.07$  min. dr = 95:5 determined by <sup>1</sup>H NMR.

**<sup>1</sup>H NMR** (400 MHz, Chloroform-*d*)  $\delta = 7.53 - 7.37$  (m, 5H), 7.27 - 7.19 (m, 3H), 7.09 - 7.04 (m, 2H), 7.01 (d,  $J = 2.6$  Hz, 1H), 6.65 (s, 1H), 6.52 (dd,  $J = 9.0, 2.6$  Hz, 1H), 6.14 (d,  $J = 9.0$  Hz, 1H), 5.61 (d,  $J = 4.9$  Hz, 1H), 4.37 (d,  $J = 6.0$  Hz, 1H), 4.25 - 4.18 (m, 1H), 3.79 (s, 3H), 3.54 (s, 3H) ppm.

**<sup>13</sup>C{<sup>1</sup>H} NMR** (101 MHz, Chloroform-*d*)  $\delta = 169.9, 154.3, 139.5, 139.1, 136.0, 133.4, 129.9, 129.6, 128.8, 128.5, 128.2, 128.1, 127.4, 113.7, 112.7, 111.3, 103.9, 102.7, 55.6, 51.6, 46.9, 42.4$  ppm.

**IR** (neat): 3060, 3028, 3002, 2946, 2835, 1736, 1647, 1612, 1476, 1443, 1398, 1341, 1247, 1165, 1032, 842, 737  $\nu$  ( $\text{cm}^{-1}$ )

**HRMS** (ESI-FT) calcd for  $\text{C}_{27}\text{H}_{24}\text{NO}_3^+ ([\text{M}+\text{H}]^+) = 410.1751$ , found 410.1749.

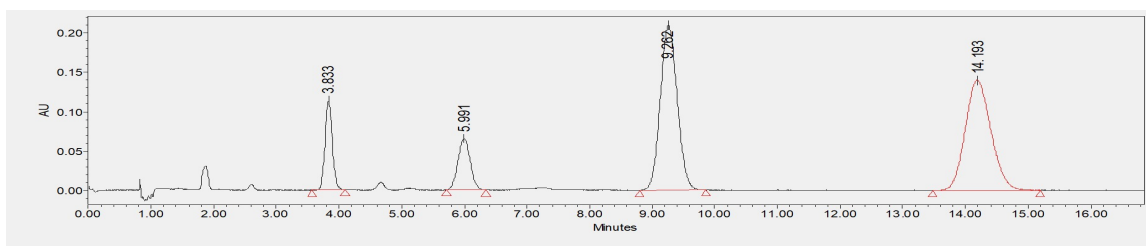

|   | Retention Time | Area    | % Area |
|---|----------------|---------|--------|
| 1 | 3.833          | 917915  | 9.44   |
| 2 | 5.991          | 884089  | 9.09   |
| 3 | 9.262          | 3941590 | 40.53  |
| 4 | 14.193         | 3981201 | 40.94  |

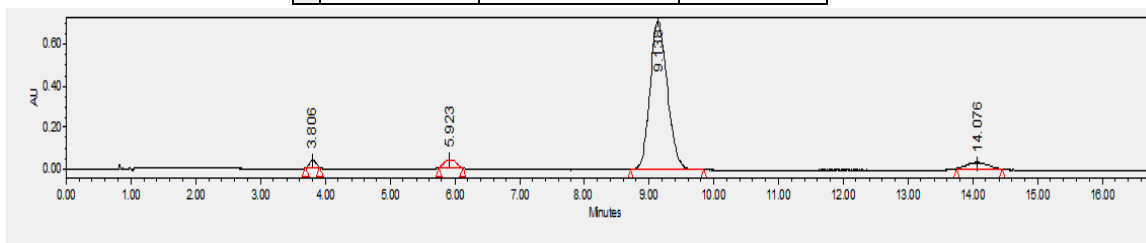

|   | Retention Time | Area     | % Area |
|---|----------------|----------|--------|
| 1 | 3.806          | 242230   | 1.67   |
| 2 | 5.923          | 456128   | 3.14   |
| 3 | 9.138          | 13177685 | 90.86  |
| 4 | 14.076         | 627871   | 4.33   |

Butyl (8*S*,9*S*)-2-methoxy-6,8-diphenyl-8,9-dihydropyrido[1,2-*a*]indole-9-carboxylate **3c**

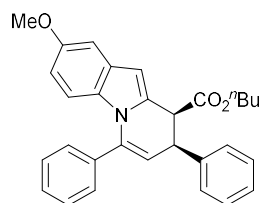

**3c**

Yellow oil;  $R_f = 0.6$  (petroleum ether/ethyl acetate = 6/1), 63% yield, 95% ee, 95:5 dr.  $[\alpha]_D^{24} = +25.2$  ( $c = 0.58$ , in  $\text{CH}_2\text{Cl}_2$ ,  $\lambda = 589$  nm).

Dissolved in *i*PrOH for UPC<sup>2</sup>; UPC<sup>2</sup> (Daicel CHIRALPAK AYH,  $\text{CO}_2/\text{CH}_3\text{OH} = 90/10$ , flow rate = 1.0 mL/min,  $\lambda = 254$  nm) retention time:  $t_1 = 24.32$  min,  $t_2 = 27.56$  min,  $t_3 = 32.75$  min,  $t_4 = 38.48$  min. dr = 95:5 determined by <sup>1</sup>H NMR.



**<sup>1</sup>H NMR** (400 MHz, Chloroform-*d*)  $\delta$  = 7.48 – 7.40 (m, 5H), 7.24 – 7.20 (m, 3H), 7.12 – 7.06 (m, 2H), 7.01 (d, *J* = 2.5 Hz, 1H), 6.64 (s, 1H), 6.52 (dd, *J* = 9.1, 2.6 Hz, 1H), 6.14 (d, *J* = 9.0 Hz, 1H), 5.62 (d, *J* = 4.7 Hz, 1H), 4.36 (d, *J* = 5.2 Hz, 1H), 4.26 – 4.18 (m, 1H), 4.00 – 3.87 (m, 2H), 3.79 (s, 3H), 1.47 – 1.37 (m, 2H), 1.23 – 1.13 (m, 2H), 0.82 (t, *J* = 7.4 Hz, 3H) ppm.

**<sup>13</sup>C{<sup>1</sup>H} NMR** (101 MHz, Chloroform-*d*)  $\delta$  = 169.7, 154.3, 139.6, 139.0, 136.0, 133.6, 129.9, 129.6, 128.7, 128.5, 128.5, 128.1, 127.3, 113.7, 112.8, 111.2, 103.9, 102.7, 64.6, 55.7, 47.1, 42.3, 30.4, 19.0, 13.6 ppm.

**IR** (neat): 3063, 3034, 2956, 2931, 2874, 2835, 1730, 1646, 1615, 1475, 1446, 1399, 1339, 1279, 1169, 1035, 843, 761  $\nu$  (cm<sup>-1</sup>)

**HRMS** (ESI-FT) calcd for C<sub>30</sub>H<sub>30</sub>NO<sub>3</sub><sup>+</sup> ([M]+H<sup>+</sup>) = 452.2220, found 452.2211.

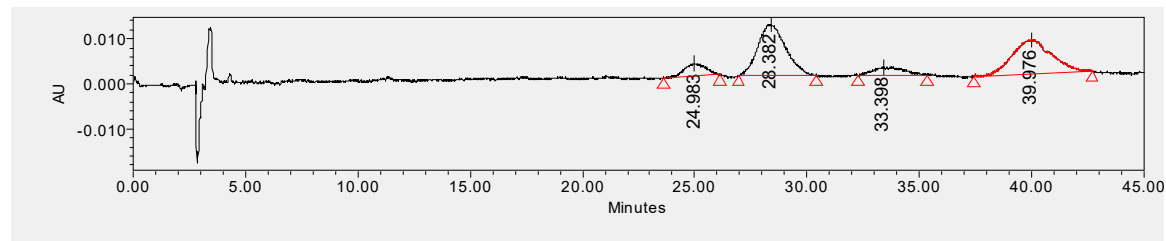

|   | Retention Time | Area   | % Area |
|---|----------------|--------|--------|
| 1 | 24.983         | 182261 | 8.16   |
| 2 | 28.382         | 965980 | 43.25  |
| 3 | 33.398         | 154147 | 6.90   |
| 4 | 39.976         | 931305 | 41.69  |

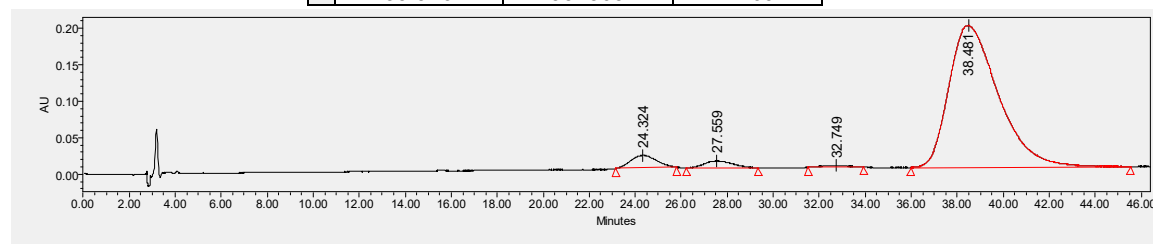

|   | Retention Time | Area     | % Area |
|---|----------------|----------|--------|
| 1 | 24.324         | 1344648  | 4.30   |
| 2 | 27.559         | 789171   | 2.52   |
| 3 | 32.749         | 156290   | 0.50   |
| 4 | 38.481         | 29011987 | 92.68  |

Prop-2-yn-1-yl (8*S*,9*S*)-2-methoxy-6,8-diphenyl-8,9-dihydropyrido[1,2-*a*]indole-9-carboxylate **3d**

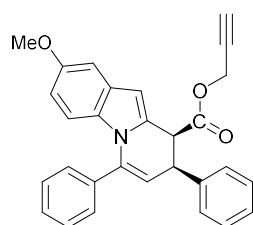

**3d**

Yellow oil; *R*<sub>f</sub> = 0.6 (petroleum ether/ethyl acetate = 6/1), 59% yield, 99% ee, 98:2 dr. [ $\alpha$ ]<sub>D</sub><sup>25</sup> = +42.3 (c = 0.35, in CH<sub>2</sub>Cl<sub>2</sub>,  $\lambda$  = 589 nm).

Dissolved in *i*PrOH for UPC<sup>2</sup>; UPC<sup>2</sup> (Daicel CHIRALPAK AD-3, CO<sub>2</sub>/CH<sub>3</sub>OH = 80/20, flow rate = 1.5 mL/min,  $\lambda$  = 254 nm) retention time: *t*<sub>1</sub> = 3.85 min, *t*<sub>2</sub> = 5.04 min, *t*<sub>3</sub> = 5.71 min, *t*<sub>4</sub> = 15.97 min. dr = 98:2 determined by <sup>1</sup>H NMR.

**<sup>1</sup>H NMR** (400 MHz, Chloroform-*d*)  $\delta$  = 7.52 – 7.39 (m, 5H), 7.24 – 7.20 (m, 3H), 7.10 – 7.05 (m, 2H), 7.01 (d, *J* = 2.6 Hz, 1H), 6.68 (s, 1H), 6.53 (dd, *J* = 9.1, 2.6 Hz, 1H), 6.14 (d, *J* = 9.0 Hz, 1H), 5.62 (d, *J* = 5.0 Hz, 1H), 4.63 – 4.46 (m, 2H), 4.41 (d, *J* = 6.0 Hz, 1H), 4.25 (t, *J* = 5.5 Hz, 1H), 3.79 (s, 3H), 2.41 (t, *J* = 2.5 Hz, 1H) ppm.

**<sup>13</sup>C{<sup>1</sup>H} NMR** (101 MHz, Chloroform-*d*)  $\delta$  = 168.6, 154.3, 139.2, 139.2, 136.0, 132.8, 129.9, 129.6, 128.8, 128.6, 128.5, 128.2, 128.2, 127.5, 113.7, 112.6, 111.4, 104.3, 104.2, 102.8, 75.2, 75.1, 55.6, 52.1, 46.7, 42.3 ppm.

IR (neat): 3265, 3059, 3028, 3002, 2930, 2832, 1740, 1644, 1612, 1475, 1446, 1400, 1273, 1146, 1033, 844, 762  $\nu$  ( $\text{cm}^{-1}$ )

HRMS (ESI-FT) calcd for  $\text{C}_{29}\text{H}_{24}\text{NO}_3^+$  ( $[\text{M}+\text{H}^+]$ ) = 434.1751, found 434.1745.

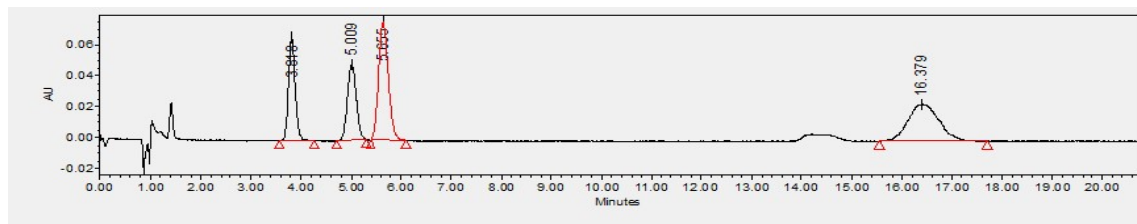

|   | Retention Time | Area    | % Area |
|---|----------------|---------|--------|
| 1 | 3.818          | 617697  | 18.92  |
| 2 | 5.009          | 601000  | 18.41  |
| 3 | 5.655          | 1017614 | 31.17  |
| 4 | 16.379         | 1027948 | 31.49  |

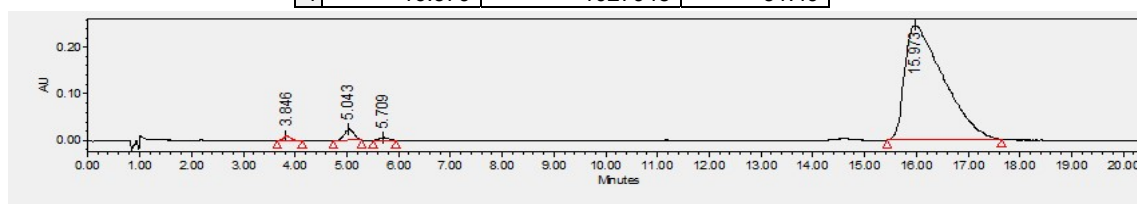

|   | Retention Time | Area     | % Area |
|---|----------------|----------|--------|
| 1 | 3.846          | 86911    | 0.66   |
| 2 | 5.043          | 284934   | 2.16   |
| 3 | 5.709          | 58141    | 0.44   |
| 4 | 15.973         | 12733391 | 96.73  |

Phenyl (8*S*,9*S*)-2-methoxy-6,8-diphenyl-8,9-dihydropyrido[1,2-*a*]indole-9-carboxylate **3e**

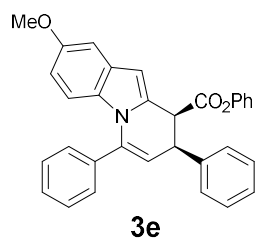

Yellow oil;  $R_f$  = 0.6 (petroleum ether/ethyl acetate = 6/1), 66% yield, 97% ee/82% ee, 93:7 dr.  $[\alpha]_D^{26} = +33.2$  ( $c = 0.59$ , in  $\text{CH}_2\text{Cl}_2$ ,  $\lambda = 589$  nm).

Dissolved in *i*PrOH for UPC<sup>2</sup>; UPC<sup>2</sup> (Daicel CHIRALPAK AD-3,  $\text{CO}_2/\text{CH}_3\text{OH} = 80/20$ , flow rate = 1.5 mL/min,  $\lambda = 254$  nm) retention time:  $t_1 = 7.01$  min,  $t_2 = 8.43$  min,  $t_3 = 11.30$  min,  $t_4 = 25.64$  min. dr = 93:7 determined by <sup>1</sup>H NMR.

<sup>1</sup>H NMR (400 MHz, Chloroform-*d*)  $\delta = 7.50 - 7.38$  (m, 5H), 7.31 - 7.25 (m, 5H), 7.22 - 7.12 (m, 3H), 7.04 (d,  $J = 2.6$  Hz, 1H), 6.81 - 6.75 (m, 3H), 6.54 (dd,  $J = 9.1$ ,

2.6 Hz, 1H), 6.15 (d,  $J = 9.0$  Hz, 1H), 5.67 (d,  $J = 4.9$  Hz, 1H), 4.62 (d,  $J = 6.1$  Hz, 1H), 4.41 - 4.34 (m, 1H), 3.80 (s, 3H) ppm.

<sup>13</sup>C{<sup>1</sup>H} NMR (101 MHz, Chloroform-*d*)  $\delta = 168.0$ , 154.4, 150.3, 139.4, 139.1, 135.9, 132.8, 130.0, 129.6, 129.3, 128.8, 128.7, 128.5, 128.4, 128.2, 127.6, 125.8, 121.4, 113.8, 112.4, 111.5, 104.4, 102.8, 55.6, 46.8, 42.4 ppm.

IR (neat): 3060, 3031, 2999, 2929, 2832, 1757, 1646, 1594, 1478, 1446, 1401, 1167, 1034, 834, 739  $\nu$  ( $\text{cm}^{-1}$ )

HRMS (ESI-FT) calcd for  $\text{C}_{32}\text{H}_{26}\text{NO}_3^+$  ( $[\text{M}+\text{H}^+]$ ) = 472.1907, found 472.1899.

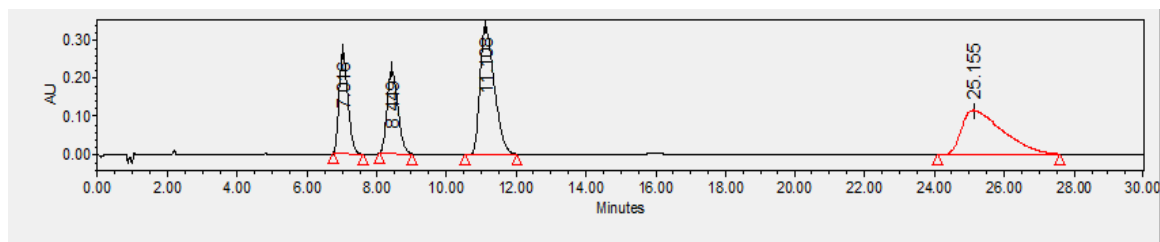

|  | Retention | Area | % Area |
|--|-----------|------|--------|
|--|-----------|------|--------|

|   | Time   |         |       |
|---|--------|---------|-------|
| 1 | 7.016  | 4663551 | 16.58 |
| 2 | 8.449  | 4656015 | 16.55 |
| 3 | 11.108 | 9465537 | 33.65 |
| 4 | 25.155 | 9340223 | 33.21 |

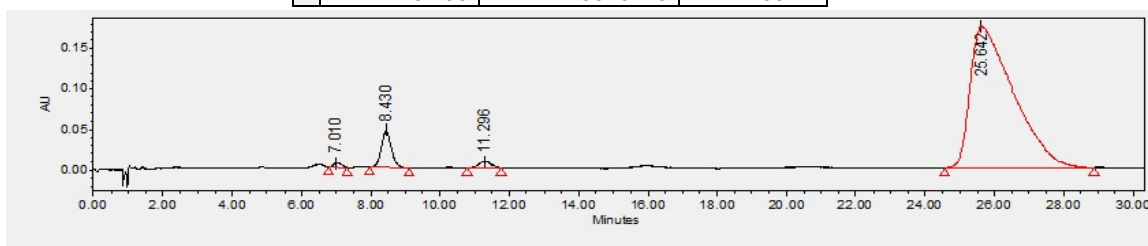

|   | Retention Time | Area     | % Area |
|---|----------------|----------|--------|
| 1 | 7.010          | 77065    | 0.47   |
| 2 | 8.430          | 938276   | 5.77   |
| 3 | 11.296         | 199383   | 1.23   |
| 4 | 25.642         | 15055054 | 92.53  |

### Benzyl (8*S*,9*S*)-2-methoxy-6,8-diphenyl-8,9-dihydropyrido[1,2-*a*]indole-9-carboxylate **3f**

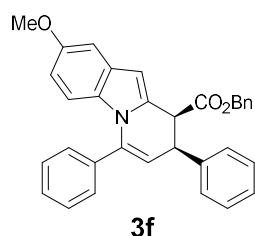

Yellow oil;  $R_f = 0.6$  (petroleum ether/ethyl acetate = 6/1), 62% yield, 98% ee, 95:5 dr.  $[\alpha]_D^{25} = +18.5$  ( $c = 0.55$ , in  $\text{CH}_2\text{Cl}_2$ ,  $\lambda = 589$  nm).

Dissolved in *i*PrOH for UPC<sup>2</sup>; UPC<sup>2</sup> (Daicel CHIRALPAK OJ-3,  $\text{CO}_2/\text{CH}_3\text{OH} = 80/20$ , flow rate = 1.5 mL/min,  $\lambda = 254$  nm) retention time:  $t_1 = 7.44$  min,  $t_2 = 13.84$  min,  $t_3 = 16.89$  min,  $t_4 = 22.71$  min. dr = 95:5 determined by <sup>1</sup>H NMR.

<sup>1</sup>H NMR (400 MHz, Chloroform-*d*)  $\delta = 7.47 - 7.38$  (m, 5H), 7.31 - 7.25 (m, 3H), 7.21 - 7.18 (m, 3H), 7.13 - 7.08 (m, 2H), 7.05 - 6.98 (m, 3H), 6.65 (s, 1H), 6.52 (dd,  $J = 9.1, 2.6$  Hz, 1H), 6.13 (d,  $J = 9.1$  Hz, 1H), 5.59 (d,  $J = 4.8$  Hz, 1H), 4.96 (q,  $J = 12.3$  Hz, 2H), 4.41 (d,  $J = 6.1$  Hz, 1H), 4.27 - 4.19 (m, 1H), 3.79 (s, 3H) ppm.

<sup>13</sup>C{<sup>1</sup>H} NMR (101 MHz, Chloroform-*d*)  $\delta = 169.3, 154.3, 139.5, 139.1, 136.0, 135.3, 133.4, 129.9, 129.6, 128.7, 128.6, 128.5, 128.4, 128.4, 128.2, 128.2, 127.3, 113.7, 112.6, 111.3, 104.0, 102.7, 66.6, 55.7, 47.1, 42.4$  ppm.

IR (neat): 3056, 3031, 2999, 2930, 2838, 1732, 1645, 1612, 1475, 1446, 1400, 1268, 1158, 1035, 843, 737  $\text{cm}^{-1}$

HRMS (ESI-FT) calcd for  $\text{C}_{32}\text{H}_{26}\text{NO}_3^+$  ( $[\text{M}+\text{H}]^+$ ) = 472.1907, found 472.1899.

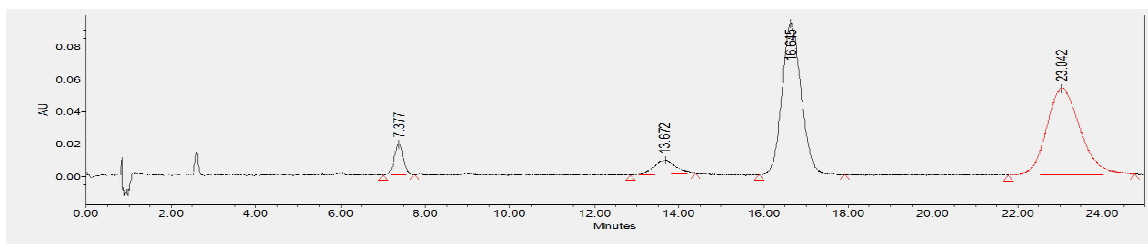

|   | Retention Time | Area    | % Area |
|---|----------------|---------|--------|
| 1 | 7.377          | 275336  | 4.32   |
| 2 | 13.672         | 283294  | 4.44   |
| 3 | 16.645         | 2908860 | 45.61  |
| 4 | 23.042         | 2909604 | 45.63  |

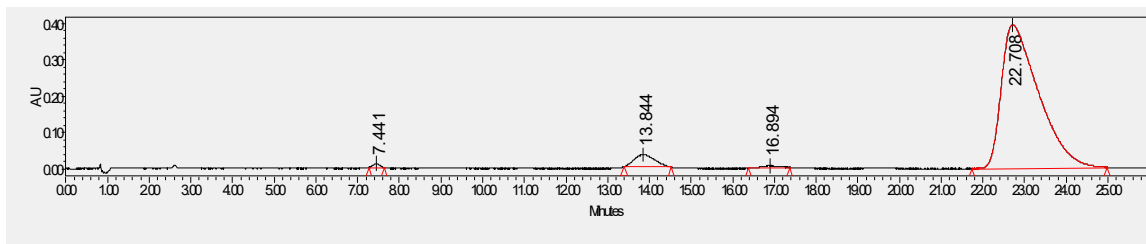

|   | Retention Time | Area     | % Area |
|---|----------------|----------|--------|
| 1 | 7.441          | 126195   | 0.49   |
| 2 | 13.844         | 1153321  | 4.48   |
| 3 | 16.894         | 159046   | 0.62   |
| 4 | 22.708         | 24318927 | 94.41  |

Isopropyl (8*S*,9*S*)-2-methoxy-6,8-diphenyl-8,9-dihydropyrido[1,2-*a*]indole-9-carboxylate **3g**

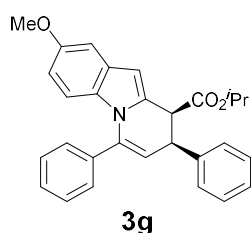

Yellow oil;  $R_f = 0.6$  (petroleum ether/ethyl acetate = 6/1), 61% yield, 91% ee/94% ee, 80:20 dr.  $[\alpha]_D^{24} = +18.9$  ( $c = 0.62$ , in  $\text{CH}_2\text{Cl}_2$ ,  $\lambda = 589$  nm).

Dissolved in *i*PrOH for UPC<sup>2</sup>; UPC<sup>2</sup> (Daicel CHIRALPAK OD-3,  $\text{CO}_2/\text{CH}_3\text{OH} = 90/10$ , flow rate = 1.5 mL/min,  $\lambda = 254$  nm) retention time:  $t_1 = 5.79$  min,  $t_2 = 7.24$  min,  $t_3 = 8.28$  min,  $t_4 = 8.88$  min. dr = 80:20 determined by <sup>1</sup>H NMR.

<sup>1</sup>H NMR (400 MHz, Chloroform-*d*)  $\delta = 7.50 - 7.35$  (m, 5H), 7.24 – 7.17 (m, 3H), 7.14 – 7.06 (m, 2H), 7.02 (d,  $J = 2.6$  Hz, 1H), 6.66 (s, 1H), 6.52 (dd,  $J = 9.1, 2.6$  Hz,

1H), 6.14 (d,  $J = 9.1$  Hz, 1H), 5.63 (d,  $J = 4.9$  Hz, 1H), 4.86 (p,  $J = 6.3$  Hz, 1H), 4.32 (d,  $J = 6.1$  Hz, 1H), 4.24 – 4.16 (m, 1H), 3.80 (s, 3H), 1.10 (d,  $J = 6.4$  Hz, 3H), 1.01 (d,  $J = 6.2$  Hz, 3H) ppm.

<sup>13</sup>C{<sup>1</sup>H} NMR (101 MHz, Chloroform-*d*)  $\delta = 169.1, 154.3, 139.6, 138.9, 136.1, 133.8, 129.9, 129.6, 128.7, 128.5, 128.4, 128.3, 128.2, 127.3, 113.7, 112.9, 111.1, 103.9, 102.7, 68.3, 55.7, 47.0, 42.2, 21.7, 21.6$  ppm.

IR (neat): 3066, 3034, 2980, 2935, 1727, 1645, 1615, 1475, 1460, 1400, 1275, 1171, 1036, 843, 760  $\nu$  ( $\text{cm}^{-1}$ )

HRMS (ESI-FT) calcd for  $\text{C}_{29}\text{H}_{28}\text{NO}_3^+$  ( $[\text{M}] + \text{H}^+$ ) = 438.2064, found 438.2057.

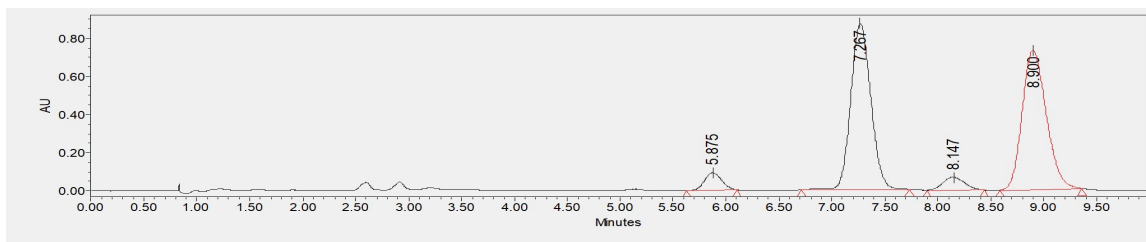

|   | Retention Time | Area     | % Area |
|---|----------------|----------|--------|
| 1 | 5.875          | 1043375  | 4.17   |
| 2 | 7.267          | 11506402 | 45.99  |
| 3 | 8.147          | 968116   | 3.87   |
| 4 | 8.900          | 11502140 | 45.97  |

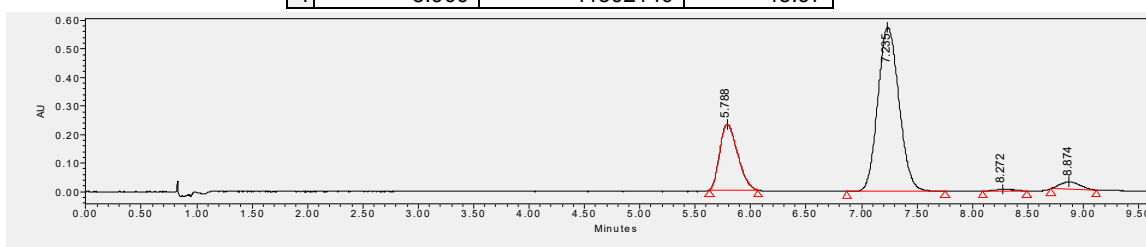

|   | Retention Time | Area    | % Area |
|---|----------------|---------|--------|
| 1 | 5.788          | 2563691 | 24.22  |
| 2 | 7.235          | 7611775 | 71.91  |
| 3 | 8.272          | 78007   | 0.74   |

|   |       |        |      |
|---|-------|--------|------|
| 4 | 8.874 | 332196 | 3.14 |
|---|-------|--------|------|

(8*S*,9*S*)-2-methoxy-6,8-diphenyl-8,9-dihydropyrido[1,2-*a*]indol-9-yl)(phenyl)methanone **3h**

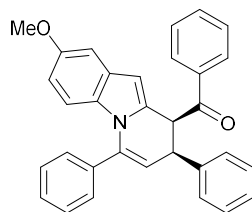

**3h**

Yellow oil;  $R_f = 0.6$  (petroleum ether/ethyl acetate = 6/1), 71% yield, 96% ee/57% ee, 67:33 dr.  $[\alpha]_D^{25} = +39.8$  ( $c = 0.64$ , in  $\text{CH}_2\text{Cl}_2$ ,  $\lambda = 589$  nm).

Dissolved in *i*PrOH for UPC<sup>2</sup>; UPC<sup>2</sup> (Daicel CHIRALPAK OD-3,  $\text{CO}_2/\text{CH}_3\text{OH} = 80/20$ , flow rate = 1.5 mL/min,  $\lambda = 254$  nm) retention time:  $t_1 = 7.25$  min,  $t_2 = 12.55$  min,  $t_3 = 15.17$  min,  $t_4 = 41.58$  min. dr = 95:5 determined by <sup>1</sup>H NMR.

<sup>1</sup>H NMR (400 MHz, Chloroform-*d*)  $\delta = 7.74$  (d,  $J = 7.7$  Hz, 2H), 7.61 – 7.40 (m, 7H), 7.34 (m, 2H), 7.27 – 7.20 (m, 2H), 7.12 – 7.05 (m, 2H), 7.00 – 6.91 (m, 2H),

6.55 – 6.52 (m, 1H), 6.23 – 6.12 (m, 1H), 5.64 (d,  $J = 4.8$  Hz, 1H), 5.38 (d,  $J = 5.8$  Hz, 1H), 4.30 (d,  $J = 5.5$  Hz, 1H), 3.76 (s, 3H) ppm.

<sup>13</sup>C{<sup>1</sup>H} NMR (101 MHz, Chloroform-*d*)  $\delta = 196.2$ , 154.3, 139.3, 139.2, 137.4, 136.1, 134.8, 132.8, 129.9, 129.6, 128.8, 128.6, 128.5, 128.4, 128.4, 128.4, 128.3, 127.2, 113.7, 113.0, 111.1, 103.8, 102.7, 55.7, 47.2, 43.6 ppm.

IR (neat): 3060, 3037, 3002, 2941, 2835, 1683, 1646, 1606, 1476, 1442, 1399, 1206, 1169, 837, 760  $\nu$  ( $\text{cm}^{-1}$ )

HRMS (ESI-FT) calcd for  $\text{C}_{32}\text{H}_{26}\text{NO}_2^+$  ( $[\text{M}+\text{H}]^+$ ) = 456.1959, found 456.1953.

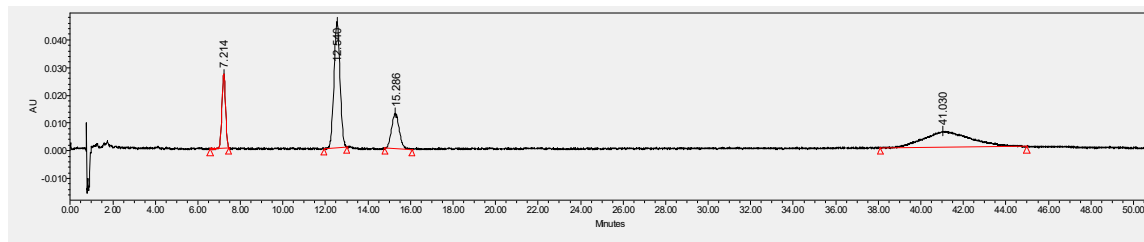

|   | Retention Time | Area   | % Area |
|---|----------------|--------|--------|
| 1 | 7.214          | 314336 | 12.98  |
| 2 | 12.540         | 908893 | 37.52  |
| 3 | 15.286         | 316101 | 13.05  |
| 4 | 41.030         | 883259 | 36.46  |

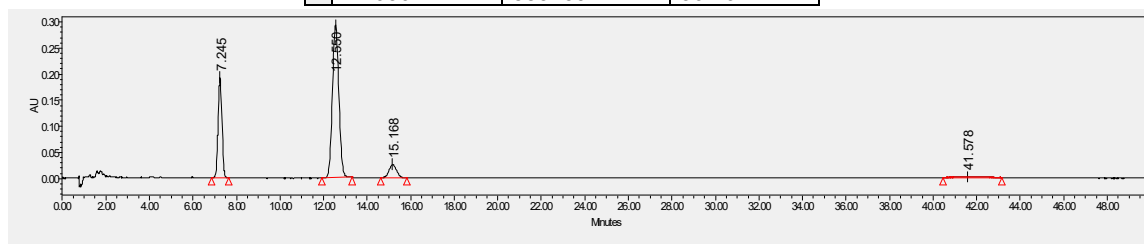

|   | Retention Time | Area    | % Area |
|---|----------------|---------|--------|
| 1 | 7.245          | 2393980 | 26.09  |
| 2 | 12.550         | 6015096 | 65.55  |
| 3 | 15.168         | 645594  | 7.04   |
| 4 | 41.578         | 121761  | 1.33   |

Ethyl (8*S*,9*S*)-2-methyl-6,8-diphenyl-8,9-dihydropyrido[1,2-*a*]indole-9-carboxylate **3i**

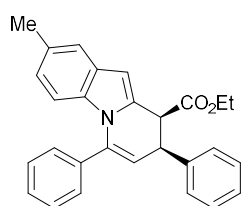

**3i**

Yellow oil;  $R_f = 0.6$  (petroleum ether/ethyl acetate = 6/1), 51% yield, 96% ee, 95:5 dr.  $[\alpha]_D^{26} = +29.5$  ( $c = 0.26$ , in  $\text{CH}_2\text{Cl}_2$ ,  $\lambda = 589$  nm).

Dissolved in *i*PrOH for UPC<sup>2</sup>; UPC<sup>2</sup> (Daicel CHIRALPAK OJ-3,  $\text{CO}_2/\text{CH}_3\text{OH} = 80/20$ , flow rate = 1.5 mL/min,  $\lambda = 254$  nm) retention time:  $t_1 = 2.18$  min,  $t_2 = 3.44$  min,  $t_3 = 3.97$  min,  $t_4 = 7.18$  min. dr = 95:5 determined by <sup>1</sup>H NMR.

<sup>1</sup>H NMR (400 MHz, Chloroform-*d*)  $\delta = 7.50$  – 7.39 (m, 5H), 7.33 (s, 1H), 7.24 –

7.20 (m, 3H), 7.16 – 7.03 (m, 2H), 6.69 (dd,  $J = 8.6, 1.7$  Hz, 1H), 6.64 (s, 1H), 6.14 (d,  $J = 8.5$  Hz, 1H), 5.62 (d,  $J = 4.8$  Hz, 1H), 4.35 (d,  $J = 6.0$  Hz, 1H), 4.26 – 4.18 (m, 1H), 3.99 (m, 2H), 2.36 (s, 3H), 1.07 (t,  $J = 7.1$  Hz, 3H) ppm.

$^{13}\text{C}\{^1\text{H}\}$  NMR (101 MHz, Chloroform- $d$ )  $\delta = 169.6, 139.7, 139.1, 136.2, 133.1, 129.6, 129.3, 128.7, 128.5, 128.2, 128.2, 127.3, 123.2, 120.4, 112.9, 112.7, 103.8, 60.7, 47.0, 42.4, 21.2, 14.0$  ppm.

IR (neat): 3063, 3028, 2983, 2928, 2854, 1734, 1647, 1600, 1493, 1449, 1254, 1176, 1072, 872, 759  $\nu$  ( $\text{cm}^{-1}$ )

HRMS (ESI-FT) calcd for  $\text{C}_{28}\text{H}_{26}\text{NO}_2^+$  ( $[\text{M}+\text{H}^+]$ ) = 408.1958, found 408.1950.

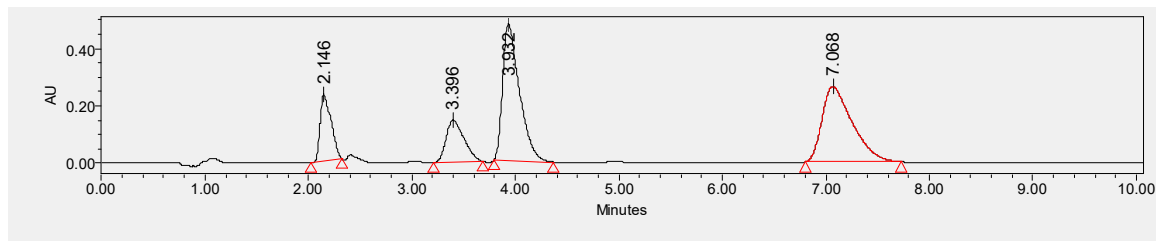

|   | Retention Time | Area    | % Area |
|---|----------------|---------|--------|
| 1 | 2.146          | 1723619 | 12.13  |
| 2 | 3.396          | 1762165 | 12.40  |
| 3 | 3.932          | 5383442 | 37.88  |
| 4 | 7.068          | 5343918 | 37.60  |

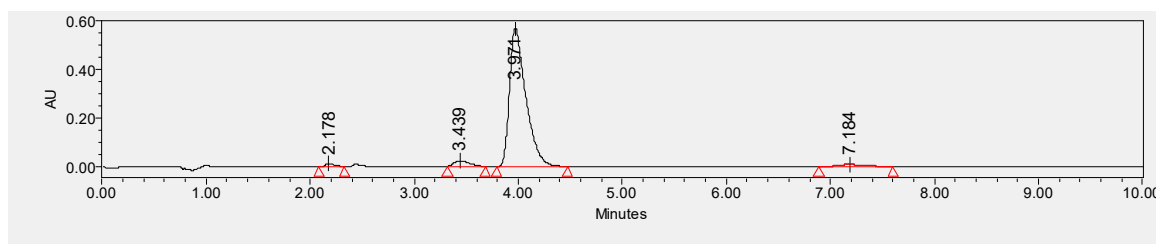

|   | Retention Time | Area    | % Area |
|---|----------------|---------|--------|
| 1 | 2.178          | 80906   | 1.21   |
| 2 | 3.439          | 238162  | 3.56   |
| 3 | 3.971          | 6197125 | 92.62  |
| 4 | 7.184          | 174446  | 2.61   |

### Ethyl (8*S*,9*S*)-2-(*tert*-butyl)-6,8-diphenyl-8,9-dihydropyrido[1,2-*a*]indole-9-carboxylate **3j**

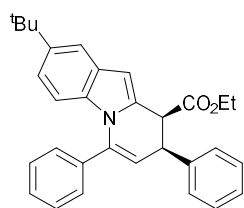

**3j**

Yellow oil;  $R_f = 0.6$  (petroleum ether/ethyl acetate = 6/1), 63% yield, 95% ee, 96:4 dr.  $[\alpha]_D^{26} = +39.6$  ( $c = 0.48$ , in  $\text{CH}_2\text{Cl}_2$ ,  $\lambda = 589$  nm).

Dissolved in *i*PrOH for UPC<sup>2</sup>; UPC<sup>2</sup> (Daicel CHIRALPAK ODH,  $\text{CO}_2/\text{CH}_3\text{OH} = 80/20$ , flow rate = 1.5 mL/min,  $\lambda = 254$  nm) retention time:  $t_1 = 11.68$  min,  $t_2 = 12.76$  min,  $t_3 = 14.72$  min,  $t_4 = 15.51$  min. dr = 96:4 determined by  $^1\text{H}$  NMR.

$^1\text{H}$  NMR (400 MHz, Chloroform- $d$ )  $\delta = 7.54$  (d,  $J = 2.0$  Hz, 1H), 7.52 – 7.40 (m, 5H), 7.23 (d,  $J = 4.1$  Hz, 3H), 7.14 – 7.08 (m, 2H), 6.95 (dd,  $J = 8.8, 2.0$  Hz, 1H), 6.67 (s, 1H), 6.17 (d,  $J = 8.8$  Hz, 1H), 5.59 (d,  $J = 4.6$  Hz, 1H), 4.35 (d,  $J = 6.1$  Hz, 1H), 4.24 – 4.17 (m, 1H), 3.98 (m, 2H), 1.32 (s, 9H), 1.06 (t,  $J = 7.1$  Hz, 3H) ppm.

$^{13}\text{C}\{^1\text{H}\}$  NMR (101 MHz, Chloroform- $d$ )  $\delta = 169.6, 143.2, 139.8, 139.2, 136.3, 133.0, 128.8, 128.7, 128.5, 128.3, 128.2, 127.3, 119.9, 116.6, 112.5, 112.5, 104.3, 60.7, 47.0, 42.5, 34.4, 31.8, 14.0$  ppm.

IR (neat): 3066, 3031, 2958, 2933, 2832, 1730, 1646, 1602, 1474, 1450, 1397, 1290, 1174, 1030, 878, 759  $\nu$  ( $\text{cm}^{-1}$ )

HRMS (ESI-FT) calcd for  $\text{C}_{31}\text{H}_{32}\text{NO}_2^+$  ( $[\text{M}+\text{H}^+]$ ) = 450.2428, found 450.2422.

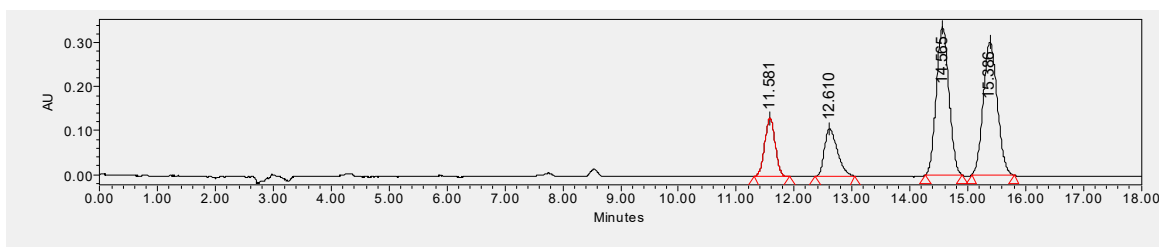

|   | Retention Time | Area    | % Area |
|---|----------------|---------|--------|
| 1 | 11.581         | 1660795 | 12.25  |
| 2 | 12.610         | 1672297 | 12.34  |
| 3 | 14.565         | 5143436 | 37.94  |
| 4 | 15.386         | 5079707 | 37.47  |

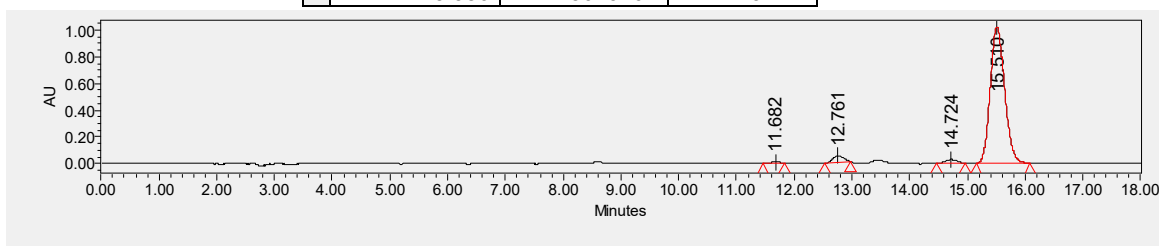

|   | Retention Time | Area     | % Area |
|---|----------------|----------|--------|
| 1 | 11.682         | 120216   | 0.64   |
| 2 | 12.761         | 664646   | 3.54   |
| 3 | 14.724         | 415491   | 2.21   |
| 4 | 15.510         | 17589562 | 93.61  |

**Ethyl (8*S*,9*S*)-2-chloro-6,8-diphenyl-8,9-dihydropyrido[1,2-*a*]indole-9-carboxylate **3k****

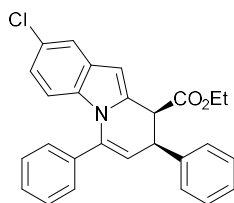

**3k**

Yellow oil;  $R_f = 0.6$  (petroleum ether/ethyl acetate = 6/1), 63% yield, 99% ee, 95:5 dr.  $[\alpha]_D^{26} = +37.3$  ( $c = 0.43$ , in  $\text{CH}_2\text{Cl}_2$ ,  $\lambda = 589$  nm).

Dissolved in *i*PrOH for UPC<sup>2</sup>; UPC<sup>2</sup> (Daicel CHIRALPAK OJ-3,  $\text{CO}_2/\text{CH}_3\text{OH} = 80/20$ , flow rate = 1.5 mL/min,  $\lambda = 254$  nm) retention time:  $t_1 = 3.05$  min,  $t_2 = 3.65$  min,  $t_3 = 6.93$  min,  $t_4 = 10.65$  min. dr = 95:5 determined by <sup>1</sup>H NMR.

**<sup>1</sup>H NMR** (400 MHz, Chloroform-*d*)  $\delta = 7.50$  (d,  $J = 2.1$  Hz, 1H), 7.49 – 7.40 (m, 5H), 7.23 (d,  $J = 2.2$  Hz, 3H), 7.10 – 7.02 (m, 2H), 6.81 (dd,  $J = 8.9, 2.2$  Hz, 1H), 6.68 (s, 1H), 6.15 (d,  $J = 8.9$  Hz, 1H), 5.69 (d,  $J = 4.9$  Hz, 1H), 4.35 (d,  $J = 6.0$  Hz, 1H), 4.28 – 4.19 (m, 1H), 4.00 (m, 2H), 1.08 (t,  $J = 7.2$  Hz, 3H) ppm.

**<sup>13</sup>C{<sup>1</sup>H} NMR** (101 MHz, Chloroform-*d*)  $\delta = 169.3, 139.2, 138.8, 135.7, 134.5, 133.0, 130.1, 129.0, 128.6, 128.5, 128.1, 128.1, 127.4, 126.0, 121.9, 120.0, 113.9, 113.8, 103.7, 60.8, 46.8, 42.2, 14.0$  ppm.

**IR** (neat): 3063, 3031, 2983, 2928, 2854, 1734, 1647, 1600, 1493, 1449, 1397, 1254, 1176, 1072, 868, 760  $\text{cm}^{-1}$

**HRMS** (ESI-FT) calcd for  $\text{C}_{27}\text{H}_{23}\text{NO}_2\text{Cl}^+ ([\text{M}+\text{H}]^+) = 428.1412$ , found 428.1418.

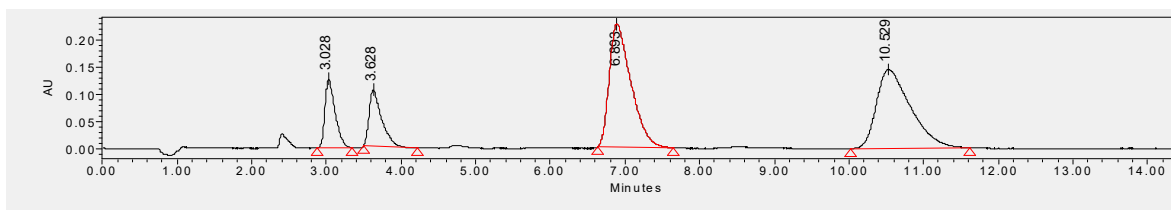

|  | Retention | Area | % Area |
|--|-----------|------|--------|
|--|-----------|------|--------|

|   | Time   |         |       |
|---|--------|---------|-------|
| 1 | 3.028  | 1193743 | 10.34 |
| 2 | 3.628  | 1215513 | 10.53 |
| 3 | 6.893  | 4552915 | 39.44 |
| 4 | 10.529 | 4583179 | 39.70 |

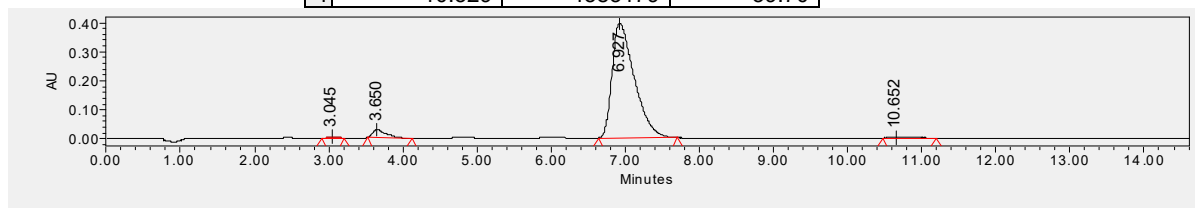

|   | Retention Time | Area    | % Area |
|---|----------------|---------|--------|
| 1 | 3.045          | 45945   | 0.53   |
| 2 | 3.650          | 355228  | 4.11   |
| 3 | 6.927          | 8217266 | 95.02  |
| 4 | 10.652         | 29106   | 0.34   |

**Ethyl (8S,9S)-2-bromo-6,8-diphenyl-8,9-dihydropyrido[1,2-a]indole-9-carboxylate **3I****

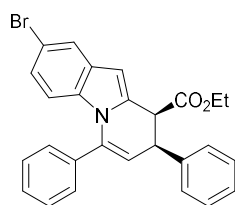

**3I**

Yellow oil;  $R_f = 0.6$  (petroleum ether/ethyl acetate = 6/1), 70% yield, 93% ee/ 50% ee, 93:7 dr.  $[\alpha]_D^{25} = +35.2$  ( $c = 0.47$ , in  $\text{CH}_2\text{Cl}_2$ ,  $\lambda = 589$  nm).

Dissolved in iPrOH for UPC<sup>2</sup>; UPC<sup>2</sup> (Daicel CHIRALPAK OJ-3,  $\text{CO}_2/\text{CH}_3\text{OH} = 80/20$ , flow rate = 1.5 mL/min,  $\lambda = 254$  nm) retention time:  $t_1 = 3.77$  min,  $t_2 = 4.50$  min,  $t_3 = 9.12$  min,  $t_4 = 14.00$  min. dr = 93:7 determined by <sup>1</sup>H NMR.

**<sup>1</sup>H NMR** (400 MHz, Chloroform-*d*)  $\delta = 7.66$  (d,  $J = 2.0$  Hz, 1H), 7.48 – 7.40 (m, 5H), 7.23 (dd,  $J = 5.1, 1.8$  Hz, 3H), 7.06 (dd,  $J = 6.7, 2.9$  Hz, 2H), 6.94 (dd,  $J = 8.9, 2.1$  Hz, 1H), 6.68 (s, 1H), 6.11 (d,  $J = 8.9$  Hz, 1H), 5.70 (d,  $J = 4.9$  Hz, 1H), 4.35 (d,  $J = 6.1$  Hz, 1H), 4.28 – 4.19 (m, 1H), 4.00 (m, 2H), 1.08 (t,  $J = 7.1$  Hz, 3H) ppm.

**<sup>13</sup>C{<sup>1</sup>H} NMR** (101 MHz, Chloroform-*d*)  $\delta = 169.2, 139.2, 138.7, 135.7, 134.3, 133.3, 130.7, 129.0, 128.6, 128.5, 128.1, 128.1, 127.4, 124.5, 123.1, 114.4, 113.9, 113.7, 103.6, 60.8, 46.8, 42.2, 14.0$  ppm.

**IR** (neat): 3060, 3031, 2986, 2826, 2851, 1733, 1647, 1599, 1493, 1450, 1396, 1256, 1176, 1029, 868, 759  $\nu$  ( $\text{cm}^{-1}$ )

**HRMS** (ESI-FT) calcd for  $\text{C}_{27}\text{H}_{23}\text{NO}_2\text{Br}^+$  ( $[\text{M}+\text{H}]^+$ ) = 472.0907, found 472.0909.

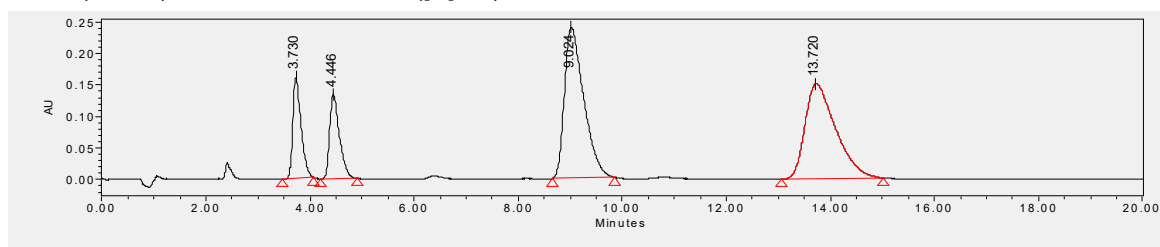

|   | Retention Time | Area    | % Area |
|---|----------------|---------|--------|
| 1 | 3.730          | 1753267 | 11.08  |
| 2 | 4.446          | 1737505 | 10.98  |
| 3 | 9.024          | 6153464 | 38.89  |
| 4 | 13.720         | 6178646 | 39.05  |



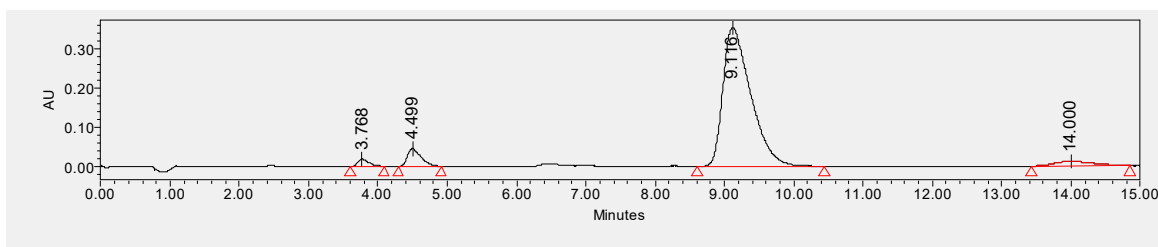

|   | Retention Time | Area    | % Area |
|---|----------------|---------|--------|
| 1 | 3.768          | 190471  | 1.73   |
| 2 | 4.499          | 608459  | 5.53   |
| 3 | 9.116          | 9749106 | 88.53  |
| 4 | 14.000         | 464148  | 4.21   |

### Ethyl (8*S*,9*S*)-8-(4-fluorophenyl)-2-methoxy-6-phenyl-8,9-dihydropyrido[1,2-*a*]indole-9-carboxylate **3m**

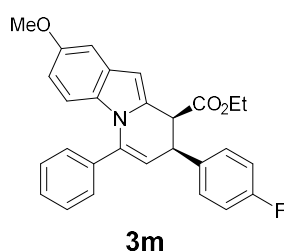

Yellow oil;  $R_f = 0.6$  (petroleum ether/ethyl acetate = 6/1), 66% yield, 97% ee, 97:3 dr.  $[\alpha]_D^{26} = +40.0$  ( $c = 0.57$ , in  $\text{CH}_2\text{Cl}_2$ ,  $\lambda = 589$  nm).

Dissolved in iPrOH for UPC<sup>2</sup>; UPC<sup>2</sup> (Daicel CHIRALPAK OD-3,  $\text{CO}_2/\text{CH}_3\text{OH} = 80/20$ , flow rate = 1.5 mL/min,  $\lambda = 254$  nm) retention time:  $t_1 = 3.16$  min,  $t_2 = 3.78$  min,  $t_3 = 4.62$  min,  $t_4 = 5.34$  min. dr = 97:3 determined by <sup>1</sup>H NMR.

<sup>1</sup>H NMR (400 MHz, Chloroform-*d*)  $\delta = 7.48 - 7.41$  (m, 5H), 7.05 – 6.98 (m, 3H), 6.95 – 6.88 (m, 2H), 6.67 (s, 1H), 6.52 (dd,  $J = 9.1, 2.6$  Hz, 1H), 6.13 (d,  $J = 9.1$  Hz, 1H), 5.58 (d,  $J = 5.1$  Hz, 1H), 4.34 (d,  $J = 6.0$  Hz, 1H), 4.20 (t,  $J = 5.6$  Hz, 1H), 4.08 – 3.98 (m, 2H), 3.79 (s, 3H), 1.12 (t,  $J = 7.1$  Hz, 3H) ppm.

<sup>13</sup>C{<sup>1</sup>H} NMR (101 MHz, Chloroform-*d*)  $\delta = 169.4, 162.0$  ( $J = 246.6$  Hz), 154.4, 139.2, 135.9, 135.3 ( $J = 2.9$  Hz), 133.2, 129.8 ( $J = 4.0$  Hz), 129.7, 129.7, 128.9, 128.5, 128.2, 115.4, 115.2, 113.7, 112.6, 111.3, 104.3, 102.8, 60.8, 55.7, 46.9, 41.5, 14.0 ppm.

IR (neat): 3063, 2989, 2933, 2832, 1730, 1646, 1606, 1507, 1475, 1444, 1398, 1206, 1163, 1032, 841, 761  $\text{cm}^{-1}$

HRMS (ESI-FT) calcd for  $\text{C}_{28}\text{H}_{25}\text{NO}_3\text{F}^+$  ( $[\text{M}+\text{H}]^+$ ) = 442.1813, found 442.1811.

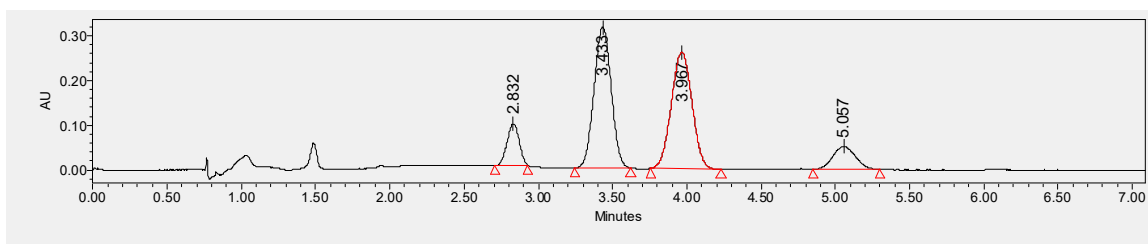

|   | Retention Time | Area    | % Area |
|---|----------------|---------|--------|
| 1 | 2.832          | 527432  | 8.60   |
| 2 | 3.433          | 2546717 | 41.52  |
| 3 | 3.967          | 2523072 | 41.14  |
| 4 | 5.057          | 536259  | 8.74   |

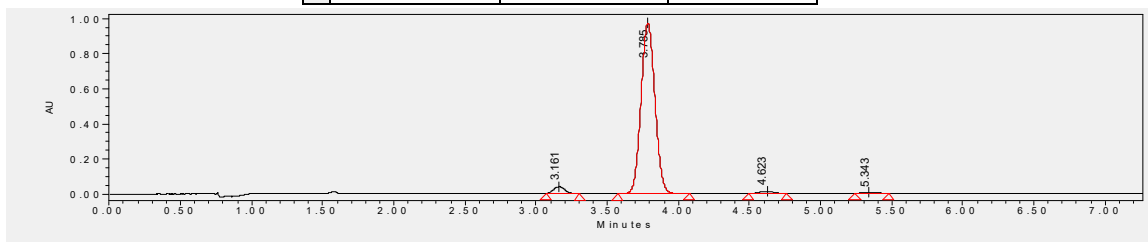

|   | Retention Time | Area    | % Area |
|---|----------------|---------|--------|
| 1 | 3.161          | 216289  | 3.12   |
| 2 | 3.785          | 6576564 | 94.85  |
| 3 | 4.623          | 94282   | 1.36   |
| 4 | 5.343          | 46871   | 0.68   |

Ethyl (8*S*,9*S*)-8-(4-chlorophenyl)-2-methoxy-6-phenyl-8,9-dihydropyrido[1,2-*a*]indole-9-carboxylate **3n**

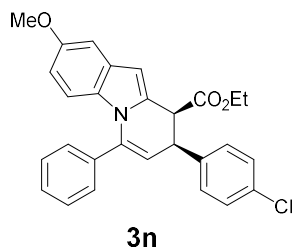

Yellow oil;  $R_f = 0.6$  (petroleum ether/ethyl acetate = 6/1), 65% yield, 97% ee, 96:4 dr.  $[\alpha]_D^{24} = +44.1$  ( $c = 0.53$ , in  $\text{CH}_2\text{Cl}_2$ ,  $\lambda = 589$  nm).

Dissolved in *i*PrOH for UPC<sup>2</sup>; UPC<sup>2</sup> (Daicel CHIRALPAK OJ-3,  $\text{CO}_2/\text{CH}_3\text{OH} = 80/20$ , flow rate = 1.5 mL/min,  $\lambda = 254$  nm) retention time:  $t_1 = 4.36$  min,  $t_2 = 5.34$  min,  $t_3 = 6.52$  min,  $t_4 = 8.16$  min. dr = 96:4 determined by <sup>1</sup>H NMR.

<sup>1</sup>H NMR (400 MHz, Chloroform-*d*)  $\delta = 7.49 - 7.42$  (m, 5H), 7.22 – 7.15 (m, 2H), 7.01 (d,  $J = 2.6$  Hz, 1H), 7.00 – 6.93 (m, 2H), 6.68 (s, 1H), 6.52 (dd,  $J = 9.1, 2.6$  Hz, 1H), 6.13 (d,  $J = 9.1$  Hz, 1H), 5.57 (d,  $J = 5.1$  Hz, 1H), 4.35 (d,  $J = 6.0$  Hz, 1H), 4.18 (t,  $J = 5.6$  Hz, 1H), 4.07 – 3.99 (m, 2H), 3.79 (s, 3H), 1.13 (t,  $J = 7.1$  Hz, 3H) ppm.

<sup>13</sup>C{<sup>1</sup>H} NMR (101 MHz, Chloroform-*d*)  $\delta = 169.3, 154.4, 139.3, 138.1, 135.8, 133.1, 129.8, 129.6, 129.6, 128.9, 128.6, 128.5, 128.1, 113.7, 112.2, 111.3, 104.3, 102.7, 60.8, 55.7, 46.7, 41.6, 14.0$  ppm.

IR (neat): 3056, 2983, 2934, 2835, 1731, 1646, 1616, 1477, 1444, 1400, 1205, 1171, 1094, 760  $\nu$  ( $\text{cm}^{-1}$ )

HRMS (ESI-FT) calcd for  $\text{C}_{28}\text{H}_{25}\text{NO}_3\text{Cl}^+$  ( $[\text{M}]^+\text{H}^+$ ) = 458.1517, found 458.1517.

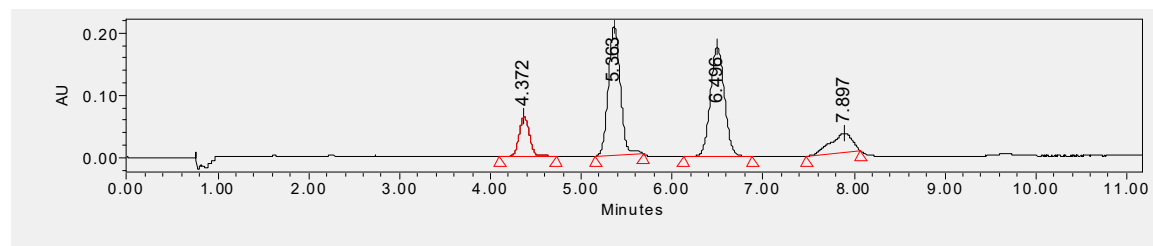

|   | Retention Time | Area    | % Area |
|---|----------------|---------|--------|
| 1 | 4.372          | 509252  | 10.61  |
| 2 | 5.363          | 1892515 | 39.42  |
| 3 | 6.496          | 1885588 | 39.27  |
| 4 | 7.897          | 513964  | 10.70  |

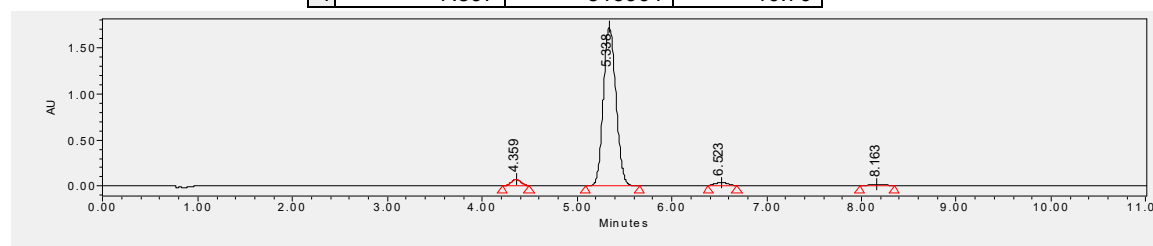

|   | Retention Time | Area     | % Area |
|---|----------------|----------|--------|
| 1 | 4.359          | 499610   | 2.94   |
| 2 | 5.338          | 16007058 | 94.26  |
| 3 | 6.523          | 315663   | 1.86   |
| 4 | 8.163          | 160009   | 0.94   |

Ethyl (8*S*,9*S*)-8-(4-bromophenyl)-2-methoxy-6-phenyl-8,9-dihydropyrido[1,2-*a*]indole-9-carboxylate **3o**

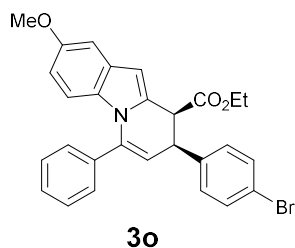

Yellow oil;  $R_f = 0.6$  (petroleum ether/ethyl acetate = 6/1), 69% yield, 99% ee, 97:3 dr.  $[\alpha]_D^{26} = +47.0$  ( $c = 0.47$ , in  $\text{CH}_2\text{Cl}_2$ ,  $\lambda = 589$  nm).

Dissolved in *i*PrOH for UPC<sup>2</sup>; UPC<sup>2</sup> (Daicel CHIRALPAK OD-3,  $\text{CO}_2/\text{CH}_3\text{OH} = 80/20$ , flow rate = 1.5 mL/min,  $\lambda = 254$  nm) retention time:  $t_1 = 5.26$  min,  $t_2 = 6.44$  min,  $t_3 = 7.78$  min,  $t_4 = 9.55$  min. dr = 95:5 determined by <sup>1</sup>H NMR.

<sup>1</sup>H NMR (400 MHz, Chloroform-*d*)  $\delta = 7.49 - 7.41$  (m, 5H), 7.37 - 7.30 (m, 2H), 7.01 (d,  $J = 2.6$  Hz, 1H), 6.91 (d,  $J = 8.5$  Hz, 2H), 6.68 (s, 1H), 6.52 (dd,  $J = 9.1, 2.6$  Hz, 1H), 6.12 (d,  $J = 9.1$  Hz, 1H), 5.56 (d,  $J = 5.2$  Hz, 1H), 4.35 (d,  $J = 4.9$  Hz, 1H), 4.17 (t,  $J = 5.6$  Hz, 1H), 4.09 - 3.99 (m, 2H), 3.80 (s, 3H), 1.13 (t,  $J = 7.1$  Hz, 3H) ppm.

<sup>13</sup>C{<sup>1</sup>H} NMR (101 MHz, Chloroform-*d*)  $\delta = 169.3, 154.4, 139.3, 138.6, 135.8, 133.1, 131.5, 130.0, 129.8, 129.7, 128.9, 128.5, 128.1, 121.2, 113.7, 112.2, 111.4, 104.4, 102.8, 60.9, 55.7, 46.6, 41.7, 14.1$  ppm.

IR (neat): 3063, 2986, 2931, 2854, 2832, 1731, 1647, 1617, 1479, 1447, 1400, 1205, 1172, 1074, 841, 759  $\text{cm}^{-1}$

HRMS (ESI-FT) calcd for  $\text{C}_{28}\text{H}_{25}\text{NO}_3\text{Br}^+$  ( $[\text{M}] + \text{H}^+$ ) = 502.1012, found 502.1009.

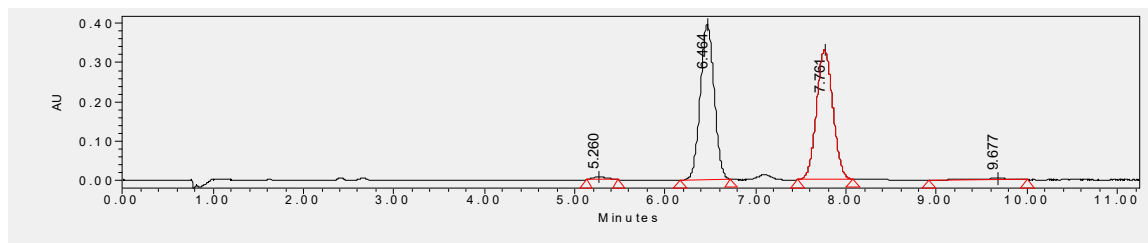

|   | Retention Time | Area    | % Area |
|---|----------------|---------|--------|
| 1 | 5.260          | 75499   | 0.88   |
| 2 | 6.464          | 4212517 | 49.32  |
| 3 | 7.761          | 4180452 | 48.94  |
| 4 | 9.677          | 73103   | 0.86   |

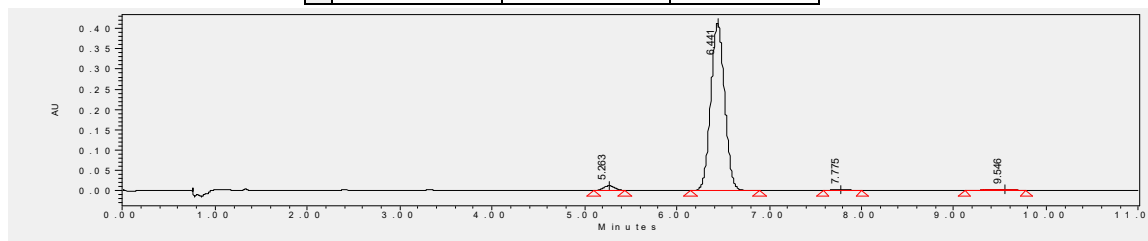

|   | Retention Time | Area    | % Area |
|---|----------------|---------|--------|
| 1 | 5.263          | 105436  | 2.35   |
| 2 | 6.441          | 4320725 | 96.41  |
| 3 | 7.775          | 21722   | 0.48   |
| 4 | 9.546          | 33729   | 0.75   |

### Ethyl (8*S*,9*S*)-2-methoxy-8-(4-nitrophenyl)-6-phenyl-8,9-dihydroindolo[1,2-*a*]pyridine-9-carboxylate **3p**

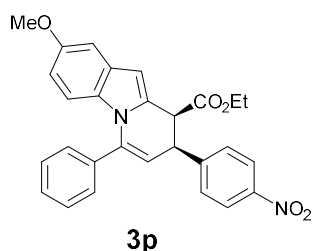

Yellow oil;  $R_f = 0.6$  (petroleum ether/ethyl acetate = 6/1), 70% yield, 97% ee, 98:2 dr.  $[\alpha]_D^{26} = +86.5$  ( $c = 0.51$ , in  $\text{CH}_2\text{Cl}_2$ ,  $\lambda = 589$  nm).

Dissolved in *i*PrOH for UPC<sup>2</sup>; UPC<sup>2</sup> (Daicel CHIRALPAK OD-3,  $\text{CO}_2/\text{CH}_3\text{OH} = 80/20$ , flow rate = 1.5 mL/min,  $\lambda = 254$  nm) retention time:  $t_1 = 6.43$  min,  $t_2 = 7.07$  min,  $t_3 = 10.34$  min,  $t_4 = 13.64$  min. dr = 98:2 determined by <sup>1</sup>H NMR.

<sup>1</sup>H NMR (400 MHz, Chloroform-*d*)  $\delta = 8.10 - 8.02$  (m, 2H), 7.51 - 7.43 (m,

5H), 7.20 – 7.13 (m, 2H), 7.02 (d,  $J = 2.6$  Hz, 1H), 6.72 (s, 1H), 6.54 (dd,  $J = 9.1, 2.6$  Hz, 1H), 6.13 (d,  $J = 9.1$  Hz, 1H), 5.59 (d,  $J = 5.5$  Hz, 1H), 4.43 (d,  $J = 4.6$  Hz, 1H), 4.30 (t,  $J = 5.7$  Hz, 1H), 4.11 – 4.02 (m, 2H), 3.80 (s, 3H), 1.15 (t,  $J = 7.1$  Hz, 3H) ppm.

$^{13}\text{C}\{^1\text{H}\}$  NMR (101 MHz, Chloroform- $d$ )  $\delta = 169.0, 154.6, 147.3, 147.1, 140.0, 135.5, 132.4, 129.8, 129.7, 129.2, 129.2, 128.6, 128.1, 123.6, 113.7, 111.6, 111.1, 104.9, 102.9, 61.1, 55.7, 46.4, 41.8, 14.1$  ppm.

IR (neat): 3066, 2986, 2932, 2854, 2835, 1731, 1646, 1601, 1519, 1476, 1445, 1399, 1205, 1173, 1032, 855, 760  $\nu$  ( $\text{cm}^{-1}$ )

HRMS (ESI-FT) calcd for  $\text{C}_{28}\text{H}_{25}\text{N}_2\text{O}_5^+$  ( $[\text{M}+\text{H}^+]$ ) = 469.1758, found 469.1757.

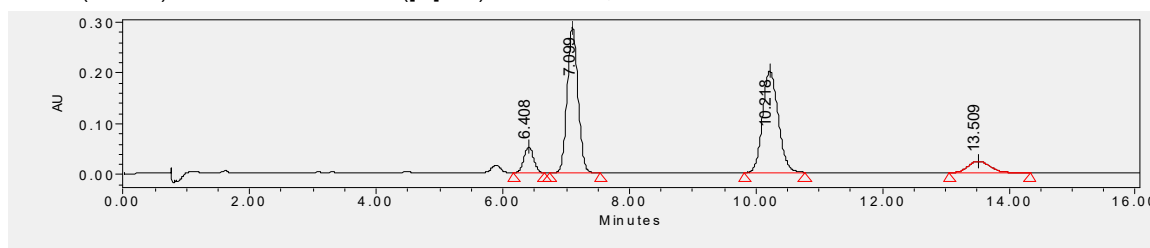

|   | Retention Time | Area    | % Area |
|---|----------------|---------|--------|
| 1 | 6.408          | 544572  | 6.86   |
| 2 | 7.099          | 3407337 | 42.92  |
| 3 | 10.218         | 3446546 | 43.41  |
| 4 | 13.509         | 540310  | 6.81   |

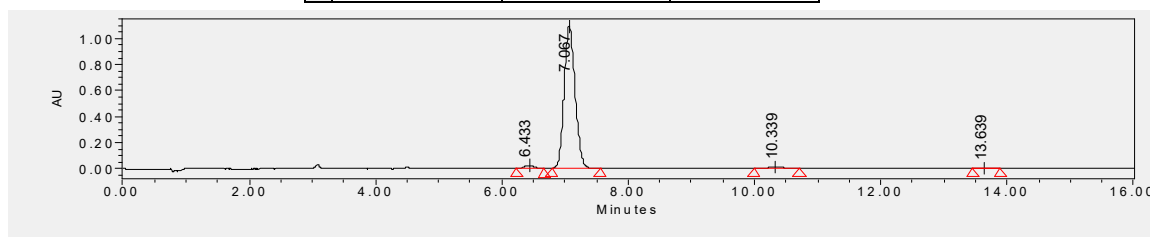

|   | Retention Time | Area     | % Area |
|---|----------------|----------|--------|
| 1 | 6.433          | 257767   | 1.87   |
| 2 | 7.067          | 13335283 | 96.52  |
| 3 | 10.339         | 201310   | 1.46   |
| 4 | 13.639         | 21632    | 0.16   |

### Ethyl (8*S*,9*S*)-2-methoxy-6-phenyl-8-(*p*-tolyl)-8,9-dihydropyrido[1,2-*a*]indole-9-carboxylate **3q**

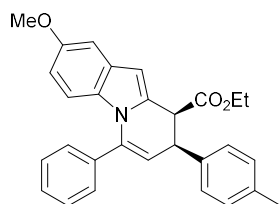

**3q**

Yellow oil;  $R_f = 0.6$  (petroleum ether/ethyl acetate = 6/1), 75% yield, 96% ee/62% ee, 94:6 dr.  $[\alpha]_D^{26} = +36.9$  ( $c = 0.54$ , in  $\text{CH}_2\text{Cl}_2$ ,  $\lambda = 589$  nm).

Dissolved in *i*PrOH for UPC<sup>2</sup>; UPC<sup>2</sup> (Daicel CHIRALPAK OD-3,  $\text{CO}_2/\text{CH}_3\text{OH} = 80/20$ , flow rate = 1.5 mL/min,  $\lambda = 254$  nm) retention time:  $t_1 = 3.81$  min,  $t_2 = 4.25$  min,  $t_3 = 5.14$  min,  $t_4 = 5.71$  min. dr = 94:6 determined by  $^1\text{H}$  NMR.

$^1\text{H}$  NMR (400 MHz, Chloroform- $d$ )  $\delta = 7.51 - 7.39$  (m, 5H), 7.10 – 6.99 (m, 3H), 6.97 – 6.85 (m, 2H), 6.65 (s, 1H), 6.51 (dd,  $J = 9.1, 2.6$  Hz, 1H), 6.14 (d,  $J = 9.0$  Hz, 1H), 5.61 (d,  $J = 5.0$  Hz, 1H), 4.33 (d,  $J = 6.1$  Hz, 1H), 4.18 (t,  $J = 5.5$  Hz, 1H), 4.06 – 3.97 (m, 2H), 3.79 (s, 3H), 2.28 (s, 3H), 1.10 (t,  $J = 7.1$  Hz, 3H) ppm.

$^{13}\text{C}\{^1\text{H}\}$  NMR (101 MHz, Chloroform- $d$ )  $\delta = 169.6, 154.3, 138.9, 136.9, 136.4, 136.1, 133.7, 129.9, 129.6, 129.2, 128.7, 128.5, 128.2, 128.0, 113.7, 113.1, 111.1, 103.9, 102.8, 60.7, 55.7, 47.0, 42.0, 21.0, 14.0$  ppm.

IR (neat): 3056, 2979, 2924, 2854, 2835, 1730, 1644, 1615, 1475, 1444, 1398, 1206, 1169, 1031, 841, 734  $\nu$  ( $\text{cm}^{-1}$ )

HRMS (ESI-FT) calcd for  $C_{29}H_{28}NO_3^+$  ( $[M]+H^+$ ) = 438.2064, found 438.2059.

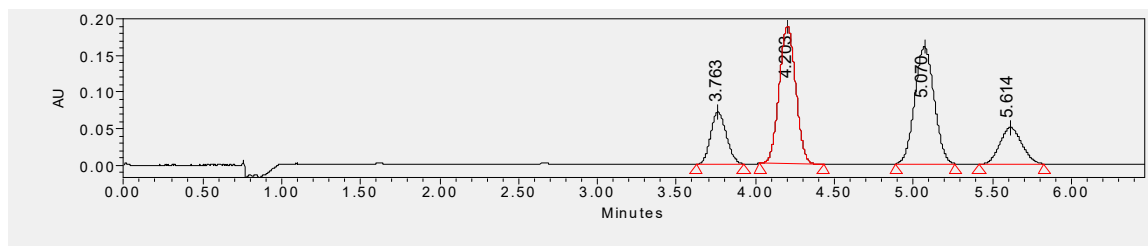

|   | Retention Time | Area    | % Area |
|---|----------------|---------|--------|
| 1 | 3.763          | 494680  | 13.21  |
| 2 | 4.203          | 1384496 | 36.97  |
| 3 | 5.070          | 1375122 | 36.72  |
| 4 | 5.614          | 490506  | 13.10  |

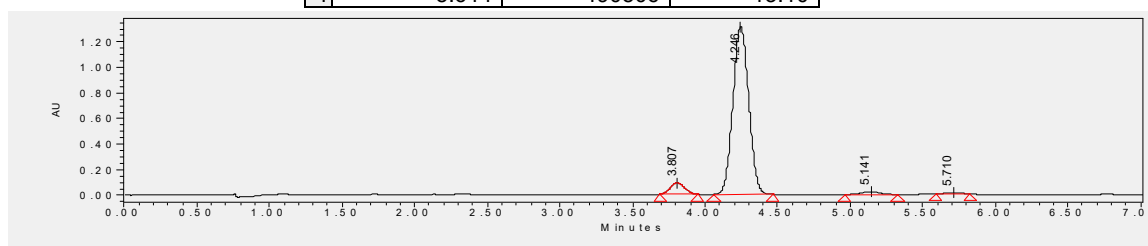

|   | Retention Time | Area     | % Area |
|---|----------------|----------|--------|
| 1 | 3.807          | 612304   | 5.60   |
| 2 | 4.246          | 10025184 | 91.77  |
| 3 | 5.141          | 192471   | 1.76   |
| 4 | 5.710          | 94724    | 0.87   |

Ethyl (8*S*,9*S*)-2-methoxy-8-(4-methoxyphenyl)-6-phenyl-8,9-dihydropyrido[1,2-*a*]indole-9-carboxylate **3r**

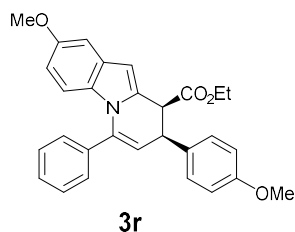

Yellow oil;  $R_f$  = 0.6 (petroleum ether/ethyl acetate = 6/1), 74% yield, 94% ee/49% ee, 88:12 dr.  $[\alpha]_D^{26} = +34.7$  ( $c = 0.44$ , in  $CH_2Cl_2$ ,  $\lambda = 589$  nm).

Dissolved in *i*PrOH for UPC<sup>2</sup>; UPC<sup>2</sup> (Daicel CHIRALPAK OD-3,  $CO_2/CH_3OH=80/20$ , flow rate = 1.5 mL/min,  $\lambda = 254$  nm) retention time:  $t_1 = 4.81$  min,  $t_2 = 5.42$  min,  $t_3 = 6.87$  min,  $t_4 = 7.28$  min. dr = 88:12 determined by <sup>1</sup>H NMR.

<sup>1</sup>H NMR (400 MHz, Chloroform-*d*)  $\delta$  = 7.52 – 7.39 (m, 5H), 7.01 (d,  $J = 2.6$  Hz, 1H), 7.00 – 6.92 (m, 2H), 6.80 – 6.71 (m, 2H), 6.67 (s, 1H), 6.52 (dd,  $J = 9.1, 2.6$  Hz, 1H), 6.14 (d,  $J = 9.0$  Hz, 1H), 5.60 (d,  $J = 5.1$  Hz, 1H), 4.32 (d,  $J = 5.0$  Hz, 1H), 4.17 (t,  $J = 5.6$  Hz, 1H), 4.03 (qd,  $J = 7.1, 3.7$  Hz, 2H), 3.79 (s, 3H), 3.74 (s, 3H), 1.12 (t,  $J = 7.1$  Hz, 3H) ppm.

<sup>13</sup>C{<sup>1</sup>H} NMR (101 MHz, Chloroform-*d*)  $\delta$  = 169.6, 158.8, 154.3, 138.8, 136.1, 133.6, 131.5, 129.9, 129.7, 129.2, 128.7, 128.5, 128.2, 113.8, 113.7, 113.3, 111.1, 104.0, 102.7, 60.7, 55.7, 55.2, 47.0, 41.5, 14.1 ppm.

IR (neat): 3066, 2995, 2932, 2835, 1732, 1646, 1612, 1583, 1511, 1476, 1446, 1399, 1250, 1175, 1034, 762  $cm^{-1}$

HRMS (ESI-FT) calcd for  $C_{29}H_{28}NO_4^+$  ( $[M]+H^+$ ) = 454.2013, found 454.2009.

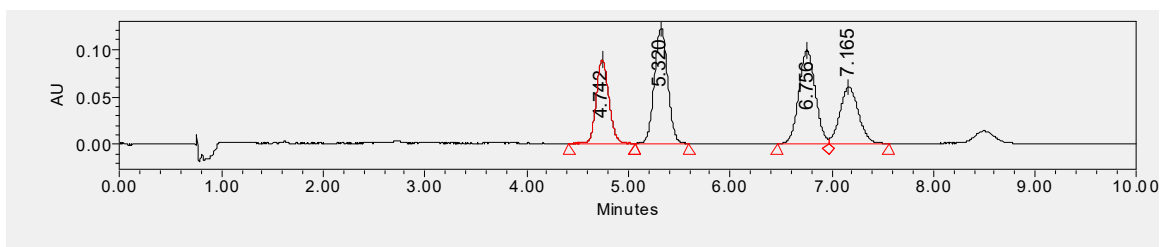

|   | Retention Time | Area    | % Area |
|---|----------------|---------|--------|
| 1 | 4.742          | 756955  | 20.35  |
| 2 | 5.320          | 1103021 | 29.66  |
| 3 | 6.756          | 1103091 | 29.66  |
| 4 | 7.165          | 756416  | 20.34  |

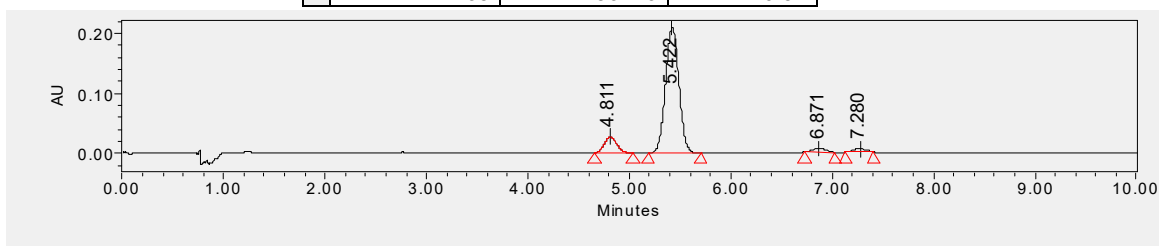

|   | Retention Time | Area    | % Area |
|---|----------------|---------|--------|
| 1 | 4.811          | 230733  | 10.15  |
| 2 | 5.422          | 1937645 | 85.25  |
| 3 | 6.871          | 56240   | 2.47   |
| 4 | 7.280          | 48232   | 2.12   |

**Ethyl (8*S*,9*S*)-8-(2-bromophenyl)-2-methoxy-6-phenyl-8,9-dihydropyrido[1,2-*a*]indole-9-carboxylate **3s****

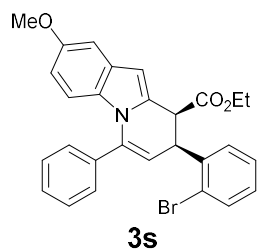

Yellow oil;  $R_f = 0.6$  (petroleum ether/ethyl acetate = 6/1), 61% yield, 97% ee, 98:2 dr.  $[\alpha]_D^{24} = +40.2$  ( $c = 0.47$ , in  $\text{CH}_2\text{Cl}_2$ ,  $\lambda = 589$  nm).

Dissolved in *i*PrOH for UPC<sup>2</sup>; UPC<sup>2</sup> (Daicel CHIRALPAK OD-3,  $\text{CO}_2/\text{CH}_3\text{OH} = 80/20$ , flow rate = 1.5 mL/min,  $\lambda = 254$  nm) retention time:  $t_1 = 4.30$  min,  $t_2 = 5.32$  min,  $t_3 = 6.50$  min,  $t_4 = 8.52$  min. dr = 98:2 determined by <sup>1</sup>H NMR.

**<sup>1</sup>H NMR** (400 MHz, Chloroform-*d*)  $\delta = 7.49 - 7.42$  (m, 5H),  $7.21 - 7.16$  (m, 2H),  $7.01$  (d,  $J = 2.6$  Hz, 1H),  $7.00 - 6.93$  (m, 2H),  $6.68$  (s, 1H),  $6.52$  (dd,  $J = 9.1, 2.6$  Hz, 1H),  $6.13$  (d,  $J = 9.1$  Hz, 1H),  $5.57$  (d,  $J = 5.2$  Hz, 1H),  $4.34$  (d,  $J = 7.1$  Hz, 1H),  $4.18$  (t,  $J = 5.6$  Hz, 1H),  $4.08 - 3.96$  (m, 2H),  $3.80$  (s, 3H),  $1.13$  (t,  $J = 7.1$  Hz, 3H) ppm.

**<sup>13</sup>C{<sup>1</sup>H} NMR** (101 MHz, Chloroform-*d*)  $\delta = 169.3, 154.4, 139.3, 138.1, 135.8, 133.1, 129.8, 129.6, 129.6, 128.9, 128.6, 128.5, 128.1, 113.7, 112.2, 111.3, 104.3, 102.7, 60.8, 55.7, 46.7, 41.6, 14.1$  ppm.

**IR** (neat): 3060, 2983, 2935, 2832, 1730, 1647, 1616, 1477, 1444, 1399, 1205, 1171, 1033, 760  $\nu$  ( $\text{cm}^{-1}$ )

**HRMS** (ESI-FT) calcd for  $\text{C}_{28}\text{H}_{25}\text{NO}_3\text{Br}^+$  ( $[\text{M}] + \text{H}^+$ ) = 502.1012, found 502.1012.

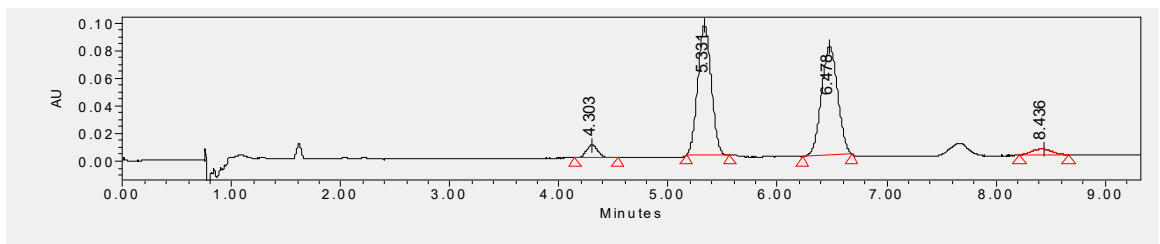

|   | Retention Time | Area  | % Area |
|---|----------------|-------|--------|
| 1 | 4.303          | 65502 | 3.74   |

|   |       |        |       |
|---|-------|--------|-------|
| 2 | 5.331 | 809553 | 46.22 |
| 3 | 6.478 | 819534 | 46.79 |
| 4 | 8.436 | 56787  | 3.24  |

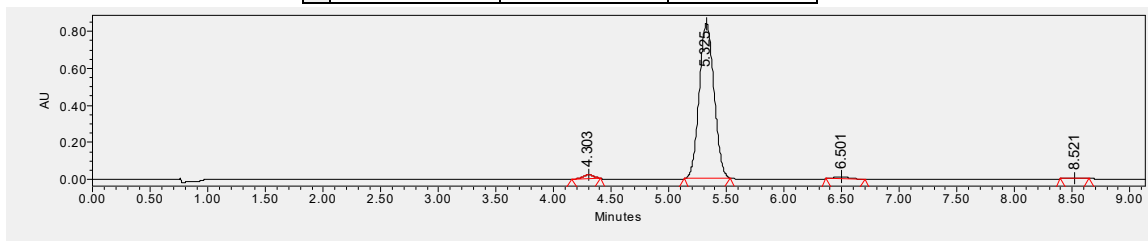

|   | Retention Time | Area    | % Area |
|---|----------------|---------|--------|
| 1 | 4.303          | 142777  | 1.84   |
| 2 | 5.325          | 7506504 | 96.62  |
| 3 | 6.501          | 99073   | 1.28   |
| 4 | 8.521          | 20397   | 0.26   |

### Ethyl (8*S*,9*S*)-2-methoxy-6-phenyl-8-(*o*-tolyl)-8,9-dihydropyrido[1,2-*a*]indole-9-carboxylate **3t**

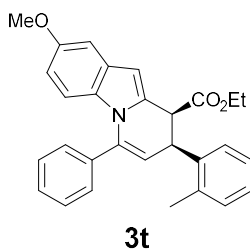

Yellow oil;  $R_f = 0.6$  (petroleum ether/ethyl acetate = 6/1), 70% yield, 95% ee, 99:1 dr.  $[\alpha]^{24}_D = -16.5$  ( $c = 0.58$ , in  $\text{CH}_2\text{Cl}_2$ ,  $\lambda = 589$  nm).

Dissolved in *i*PrOH for UPC<sup>2</sup>; UPC<sup>2</sup> (Daicel CHIRALPAK OD-3,  $\text{CO}_2/\text{CH}_3\text{OH} = 80/20$ , flow rate = 1.5 mL/min,  $\lambda = 254$  nm) retention time:  $t_1 = 3.31$  min,  $t_2 = 4.09$  min,  $t_3 = 4.61$  min,  $t_4 = 5.50$  min. dr = 99:1 determined by <sup>1</sup>H NMR.

<sup>1</sup>H NMR (400 MHz, Chloroform-*d*)  $\delta = 7.49 - 7.42$  (m, 5H), 7.21 - 7.12 (m, 2H), 7.10 - 7.07 (m, 2H), 7.02 (d,  $J = 2.6$  Hz, 1H), 6.56 (s, 1H), 6.52 (dd,  $J = 9.1, 2.6$

Hz, 1H), 6.14 (d,  $J = 9.1$  Hz, 1H), 5.56 (d,  $J = 3.8$  Hz, 1H), 4.50 (dd,  $J = 6.3, 3.7$  Hz, 1H), 4.30 (dt,  $J = 6.3, 0.9$  Hz, 1H), 4.00 - 3.83 (m, 2H), 3.80 (s, 3H), 2.43 (s, 3H), 0.98 (t,  $J = 7.1$  Hz, 3H) ppm.

<sup>13</sup>C{<sup>1</sup>H} NMR (101 MHz, Chloroform-*d*)  $\delta = 169.6, 154.3, 138.9, 138.3, 136.2, 135.8, 134.0, 130.4, 130.0, 129.4, 128.6, 128.5, 127.7, 127.2, 126.3, 113.7, 113.0, 111.3, 103.1, 102.6, 60.6, 55.7, 45.3, 38.1, 19.4, 13.8$  ppm.

IR (neat): 3060, 3031, 2983, 2935, 2835, 1732, 1646, 1616, 1477, 1445, 1400, 1207, 1172, 1033, 843, 759  $\text{cm}^{-1}$

HRMS (ESI-FT) calcd for  $\text{C}_{29}\text{H}_{28}\text{NO}_3^+$  ( $[\text{M}+\text{H}^+]$ ) = 438.2064, found 438.2064.

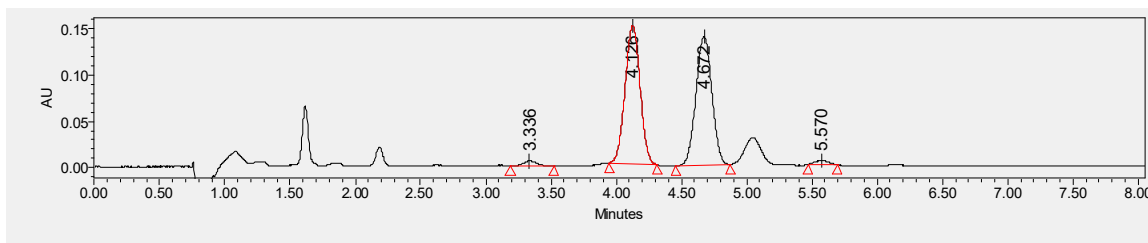

|   | Retention Time | Area    | % Area |
|---|----------------|---------|--------|
| 1 | 3.336          | 35734   | 1.46   |
| 2 | 4.126          | 1199409 | 48.99  |
| 3 | 4.672          | 1180552 | 48.22  |
| 4 | 5.570          | 32727   | 1.34   |

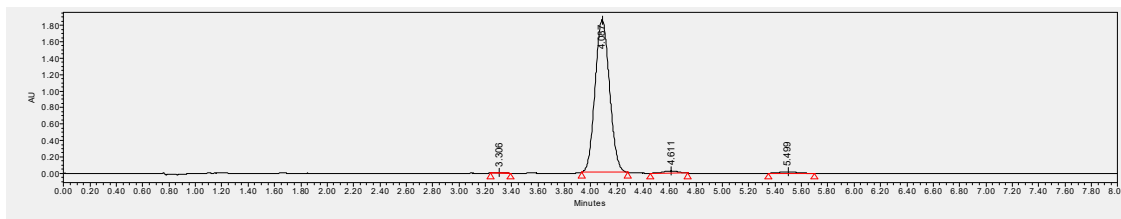

|   | Retention Time | Area     | % Area |
|---|----------------|----------|--------|
| 1 | 3.306          | 36981    | 0.25   |
| 2 | 4.087          | 14110550 | 97.21  |
| 3 | 4.611          | 208243   | 1.43   |
| 4 | 5.499          | 159890   | 1.10   |

**Ethyl (8S,9S)-8-(3-bromophenyl)-2-methoxy-6-phenyl-8,9-dihydropyrido[1,2-a]indole-9-carboxylate **3u****

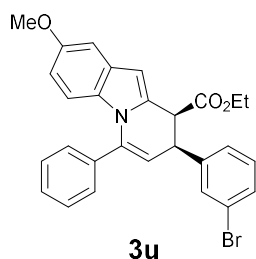

Yellow oil;  $R_f = 0.6$  (petroleum ether/ethyl acetate = 6/1), 63% yield, 97% ee, 95:5 dr.  $[\alpha]^{25}_D = +20.2$  ( $c = 0.51$ , in  $\text{CH}_2\text{Cl}_2$ ,  $\lambda = 589$  nm).

Dissolved in  $i\text{PrOH}$  for UPC<sup>2</sup>; UPC<sup>2</sup> (Daicel CHIRALPAK OJH,  $\text{CO}_2/\text{CH}_3\text{OH} = 80/20$ , flow rate = 1.5 mL/min,  $\lambda = 254$  nm) retention time:  $t_1 = 10.99$  min,  $t_2 = 20.63$  min,  $t_3 = 23.85$  min,  $t_4 = 28.59$  min. dr = 95:5 determined by  $^1\text{H}$  NMR.

**$^1\text{H}$  NMR** (400 MHz, Chloroform- $d$ )  $\delta = 7.49 - 7.43$  (m, 5H), 7.39 – 7.28 (m, 2H), 7.10 (t,  $J = 7.8$  Hz, 1H), 7.01 (d,  $J = 2.6$  Hz, 1H), 6.98 – 6.92 (m, 1H), 6.64 (s, 1H), 6.52 (dd,  $J = 9.1, 2.6$  Hz, 1H), 6.13 (d,  $J = 9.1$  Hz, 1H), 5.54 (d,  $J = 4.6$  Hz, 1H),

4.32 (d,  $J = 6.4$  Hz, 1H), 4.22 – 4.15 (m, 1H), 4.03 (q,  $J = 7.1$  Hz, 2H), 3.79 (s, 3H), 1.11 (t,  $J = 7.1$  Hz, 3H) ppm.

**$^{13}\text{C}\{^1\text{H}\}$  NMR** (101 MHz, Chloroform- $d$ )  $\delta = 169.3, 154.4, 142.1, 139.5, 135.8, 133.2, 131.4, 130.4, 130.1, 129.9, 129.5, 128.9, 128.5, 128.1, 126.7, 122.4, 113.7, 111.6, 111.4, 104.1, 102.7, 60.9, 55.7, 46.9, 41.9, 14.0$  ppm.

**IR** (neat): 3060, 2986, 2934, 2829, 1732, 1644, 1616, 1476, 1445, 1399, 1266, 1172, 1033, 843, 763  $\nu$  ( $\text{cm}^{-1}$ )

**HRMS** (ESI-FT) calcd for  $\text{C}_{28}\text{H}_{25}\text{NO}_3\text{Br}^+$  ( $[\text{M}+\text{H}]^+$ ) = 502.1012, found 502.1017.

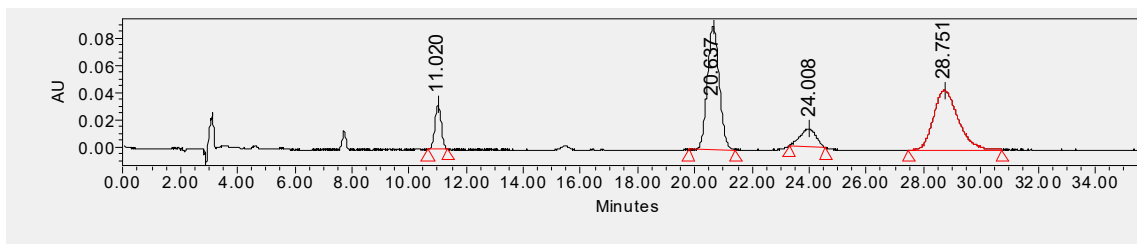

|   | Retention Time | Area    | % Area |
|---|----------------|---------|--------|
| 1 | 11.020         | 505317  | 8.05   |
| 2 | 20.637         | 2627806 | 41.87  |
| 3 | 24.008         | 503678  | 8.03   |
| 4 | 28.751         | 2639161 | 42.05  |

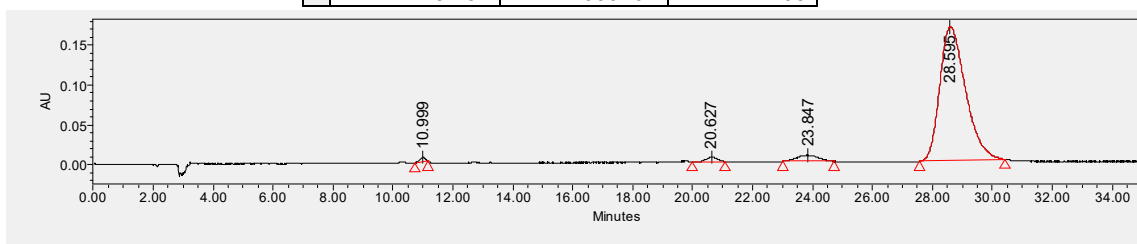



|   | Retention Time | Area     | % Area |
|---|----------------|----------|--------|
| 1 | 10.999         | 76556    | 0.72   |
| 2 | 20.627         | 154421   | 1.45   |
| 3 | 23.847         | 394539   | 3.71   |
| 4 | 28.595         | 10018259 | 94.12  |

Ethyl (8*S*,9*S*)-2-methoxy-6-phenyl-8-(*m*-tolyl)-8,9-dihydropyrido[1,2-*a*]indole-9-carboxylate **3v**

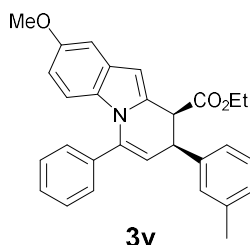

Yellow oil;  $R_f = 0.6$  (petroleum ether/ethyl acetate = 6/1), 68% yield, 92% ee/57% ee, 94:6 dr.  $[\alpha]_D^{24} = +13.2$  ( $c = 0.56$ , in  $\text{CH}_2\text{Cl}_2$ ,  $\lambda = 589$  nm).

Dissolved in *i*PrOH for UPC<sup>2</sup>; UPC<sup>2</sup> (Daicel CHIRALPAK OD-3,  $\text{CO}_2/\text{CH}_3\text{OH} = 80/20$ , flow rate = 1.5 mL/min,  $\lambda = 254$  nm) retention time:  $t_1 = 3.57$  min,  $t_2 = 4.19$  min,  $t_3 = 5.25$  min,  $t_4 = 8.95$  min. dr = 94:6 determined by <sup>1</sup>H NMR.

<sup>1</sup>H NMR (400 MHz, Chloroform-*d*)  $\delta = 7.55 - 7.37$  (m, 5H), 7.13 (t,  $J = 7.6$  Hz, 1H), 7.06 - 7.00 (m, 2H), 6.97 (s, 1H), 6.89 (d,  $J = 8.0$  Hz, 1H), 6.61 (s, 1H), 6.52 (dd,  $J = 9.1, 2.6$  Hz, 1H), 6.14 (d,  $J = 9.0$  Hz, 1H), 5.60 (d,  $J = 4.4$  Hz, 1H), 4.31 (d,  $J = 6.1$  Hz, 1H), 4.23 - 4.16 (m, 1H), 4.04 - 3.94 (m, 2H), 3.79 (s, 3H), 2.27 (s, 3H), 1.06 (t,  $J = 7.1$  Hz, 3H) ppm.

<sup>13</sup>C{<sup>1</sup>H} NMR (101 MHz, Chloroform-*d*)  $\delta = 169.6, 154.3, 139.6, 139.0, 137.9, 136.1, 133.8, 129.9, 129.5, 129.0, 128.7, 128.5, 128.4, 128.1, 128.0, 125.1, 113.7, 112.8, 111.2, 103.6, 102.7, 60.6, 55.7, 47.2, 42.3, 21.4, 14.0$  ppm.

IR (neat): 3053, 3028, 2983, 2930, 2835, 1730, 1646, 1611, 1475, 1444, 1396, 1205, 1169, 1032, 842, 763  $\text{cm}^{-1}$

HRMS (ESI-FT) calcd for  $\text{C}_{29}\text{H}_{28}\text{NO}_3^+ ([\text{M}]+\text{H}^+) = 438.2064$ , found 438.2057.

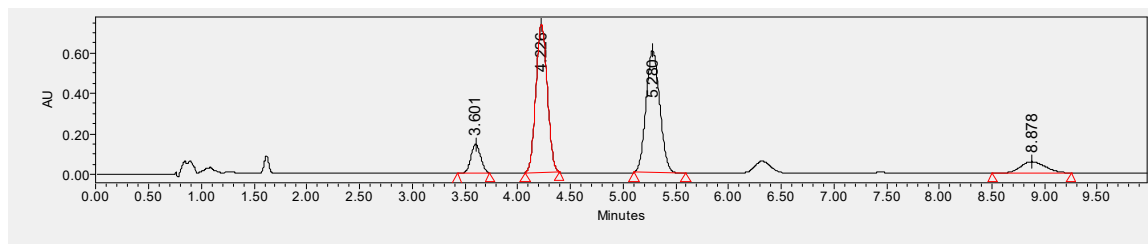

|   | Retention Time | Area    | % Area |
|---|----------------|---------|--------|
| 1 | 3.601          | 914596  | 7.18   |
| 2 | 4.226          | 5443032 | 42.74  |
| 3 | 5.280          | 5472098 | 42.97  |
| 4 | 8.878          | 904782  | 7.10   |

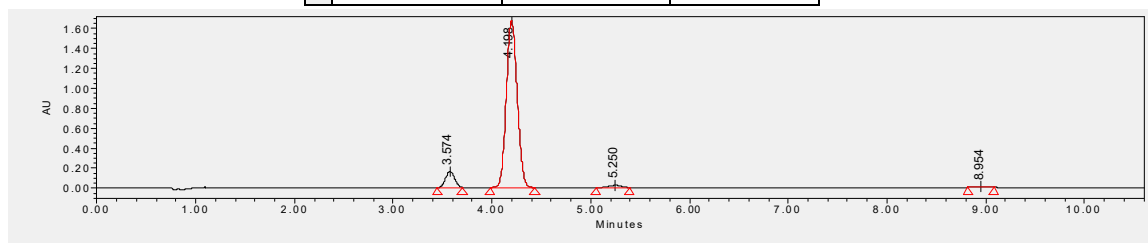

|   | Retention Time | Area     | % Area |
|---|----------------|----------|--------|
| 1 | 3.574          | 1032790  | 7.27   |
| 2 | 4.198          | 12903719 | 90.85  |
| 3 | 5.250          | 209092   | 1.47   |
| 4 | 8.954          | 58122    | 0.41   |

Ethyl (8*S*,9*S*)-8-(furan-2-yl)-2-methoxy-6-phenyl-8,9-dihydropyrido[1,2-*a*]indole-9-carboxylate **3w**

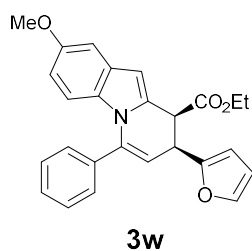

Yellow oil;  $R_f = 0.6$  (petroleum ether/ethyl acetate = 6/1), 60% yield, 90% ee/70% ee, 80:20 dr.  $[\alpha]^{26}_D = +15.7$  ( $c = 0.41$ , in  $\text{CH}_2\text{Cl}_2$ ,  $\lambda = 589$  nm).

Dissolved in *i*PrOH for UPC<sup>2</sup>; UPC<sup>2</sup> (Daicel CHIRALPAK OD-3,  $\text{CO}_2/\text{CH}_3\text{OH} = 80/20$ , flow rate = 1.5 mL/min,  $\lambda = 254$  nm) retention time:  $t_1 = 6.39$  min,  $t_2 = 8.63$  min,  $t_3 = 11.69$  min,  $t_4 = 12.84$  min. dr = 80:20 determined by <sup>1</sup>H NMR.

<sup>1</sup>H NMR (400 MHz, Chloroform-*d*)  $\delta = 7.46 - 7.40$  (m, 5H), 7.36 – 7.34 (m, 1H), 7.01 (d,  $J = 2.6$  Hz, 1H), 6.62 (s, 1H), 6.51 (dd,  $J = 9.1, 2.6$  Hz, 1H), 6.28 (dd,  $J = 3.3, 1.8$  Hz, 1H), 6.12 (d,  $J = 9.1$  Hz, 1H), 6.06 (d,  $J = 3.9$  Hz, 1H), 5.55 (d,  $J = 4.3$  Hz, 1H), 4.41 (d,  $J = 5.8$  Hz, 1H), 4.35 – 4.31 (m, 1H), 4.03 (q,  $J = 7.2$  Hz, 2H), 3.79 (s, 3H), 1.11 (t,  $J = 7.1$  Hz, 3H) ppm.

<sup>13</sup>C{<sup>1</sup>H} NMR (101 MHz, Chloroform-*d*)  $\delta = 169.4, 154.3, 153.3, 141.8, 139.4, 135.8, 133.7, 129.9, 129.4, 128.9, 128.5, 128.2, 113.6, 111.3, 110.4, 109.4, 106.5, 103.6, 102.7, 60.9, 55.7, 45.1, 36.2, 14.0$  ppm.

IR (neat): 3117, 3063, 2983, 2832, 2832, 1733, 1651, 1616, 1477, 1446, 1400, 1207, 1172, 1033, 843, 737  $\text{cm}^{-1}$

HRMS (ESI-FT) calcd for  $\text{C}_{26}\text{H}_{24}\text{NO}_4^+$  ( $[\text{M}+\text{H}]^+$ ) = 414.1700, found 414.1703.

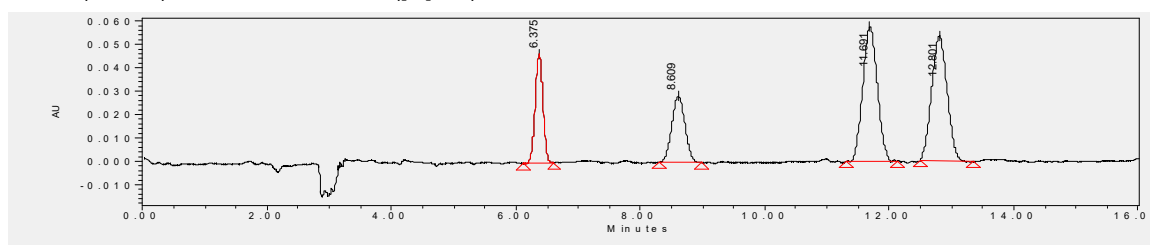

|   | Retention Time | Area   | % Area |
|---|----------------|--------|--------|
| 1 | 6.375          | 405547 | 15.11  |
| 2 | 8.609          | 417544 | 15.55  |
| 3 | 11.691         | 936160 | 34.87  |
| 4 | 12.801         | 925107 | 34.46  |

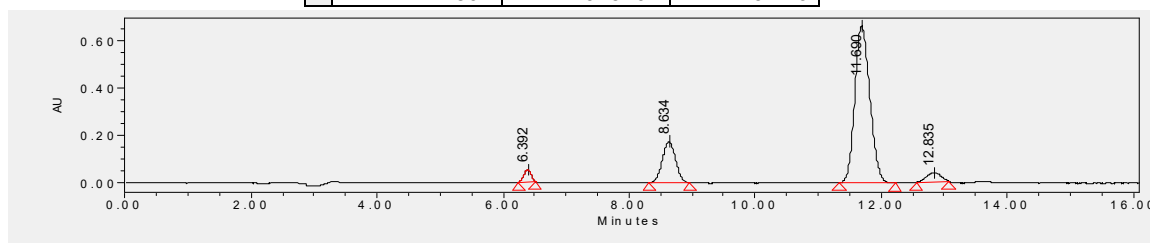

|   | Retention Time | Area     | % Area |
|---|----------------|----------|--------|
| 1 | 6.392          | 421147   | 2.87   |
| 2 | 8.634          | 2557167  | 17.44  |
| 3 | 11.690         | 11095438 | 75.65  |
| 4 | 12.835         | 592898   | 4.04   |

Ethyl (8*S*,9*S*)-2-methoxy-6-phenyl-8-(thiophen-2-yl)-8,9-dihydropyrido[1,2-*a*]indole-9-carboxylate **3x**

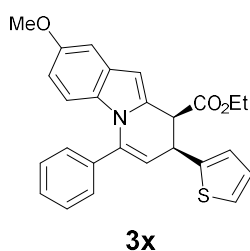

Yellow oil;  $R_f = 0.6$  (petroleum ether/ethyl acetate = 6/1), 41% yield, 97% ee/64% ee, 78:22 dr.  $[\alpha]^{26}_D = +47.8$  ( $c = 0.31$ , in  $\text{CH}_2\text{Cl}_2$ ,  $\lambda = 589$  nm).

Dissolved in *i*PrOH for UPC<sup>2</sup>; UPC<sup>2</sup> (Daicel CHIRALPAK OD-3,  $\text{CO}_2/\text{CH}_3\text{OH} = 80/20$ , flow rate = 1.5 mL/min,  $\lambda = 254$  nm) retention time:  $t_1 = 3.91$  min,  $t_2 = 5.05$  min,  $t_3 = 5.58$  min,  $t_4 = 6.19$  min. dr = 95:5 determined by <sup>1</sup>H NMR.

<sup>1</sup>H NMR (400 MHz, Chloroform-*d*)  $\delta = 7.48 - 7.41$  (m, 5H), 7.11 – 7.07 (m, 1H),

7.02 (d,  $J = 2.6$  Hz, 1H), 6.87 – 6.84 (m, 1H), 6.78 (s, 1H), 6.75 (d,  $J = 3.5$  Hz, 1H), 6.51 (dd,  $J = 9.1, 2.6$  Hz, 1H), 6.12 (d,  $J = 9.1$  Hz, 1H), 5.68 (d,  $J = 5.5$  Hz, 1H), 4.51 (t,  $J = 5.5$  Hz, 1H), 4.37 (d,  $J = 4.4$  Hz, 1H), 4.12 (q,  $J = 7.1$  Hz, 2H), 3.79 (s, 3H), 1.19 (t,  $J = 7.1$  Hz, 3H) ppm.

$^{13}\text{C}\{^1\text{H}\}$  NMR (101 MHz, Chloroform- $d$ )  $\delta = 169.2, 154.3, 142.1, 138.9, 135.8, 133.0, 129.8, 129.7, 128.9, 128.5, 128.2, 126.6, 125.5, 124.5, 113.6, 112.9, 111.3, 104.8, 102.7, 60.9, 55.6, 47.1, 37.3, 14.1$  ppm.

IR (neat): 3072, 2886, 2929, 2857, 2835, 1734, 1644, 1616, 1476, 1446, 1400, 1206, 1173, 1034, 846, 762  $\nu$  ( $\text{cm}^{-1}$ )

HRMS (ESI-FT) calcd for  $\text{C}_{26}\text{H}_{24}\text{NO}_3\text{S}^+$  ( $[\text{M}+\text{H}^+$ ) = 430.1471, found 430.1474.

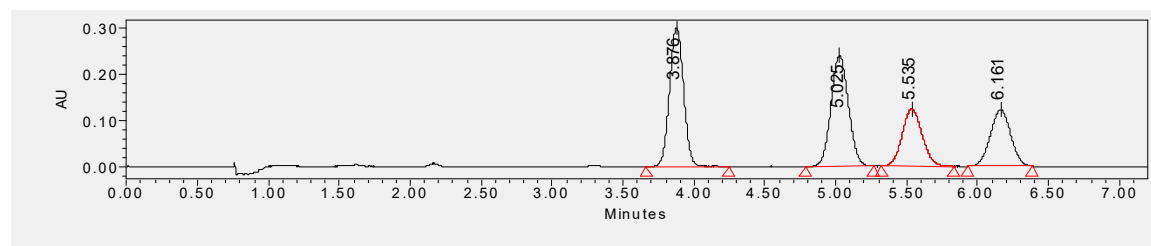

|   | Retention Time | Area    | % Area |
|---|----------------|---------|--------|
| 1 | 3.876          | 2067484 | 31.61  |
| 2 | 5.025          | 2049593 | 31.33  |
| 3 | 5.535          | 1207992 | 18.47  |
| 4 | 6.161          | 1216310 | 18.59  |

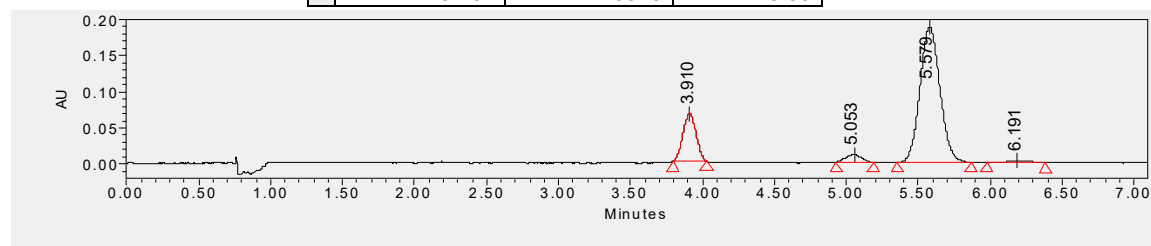

|   | Retention Time | Area    | % Area |
|---|----------------|---------|--------|
| 1 | 3.910          | 422920  | 18.04  |
| 2 | 5.053          | 80032   | 3.41   |
| 3 | 5.579          | 1811104 | 77.26  |
| 4 | 6.191          | 30185   | 1.29   |

Ethyl (8*S*,9*S*)-8-(benzo[d][1,3]dioxol-5-yl)-2-methoxy-6-phenyl-8,9-dihydropyrido[1,2-*a*]indole-9-carboxylate **3y**

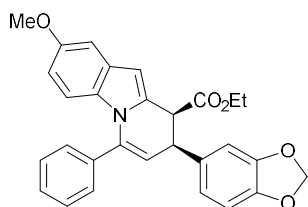

**3y**

Yellow oil;  $R_f = 0.6$  (petroleum ether/ethyl acetate = 6/1), 52% yield, 90% ee/70% ee, 80:20 dr.  $[\alpha]_D^{27} = +40.0$  ( $c = 0.45$ , in  $\text{CH}_2\text{Cl}_2$ ,  $\lambda = 589$  nm).

Dissolved in *i*PrOH for UPC<sup>2</sup>; UPC<sup>2</sup> (Daicel CHIRALPAK ODH,  $\text{CO}_2/\text{CH}_3\text{OH} = 80/20$ , flow rate = 1 mL/min,  $\lambda = 254$  nm) retention time:  $t_1 = 20.44$  min,  $t_2 = 23.49$  min,  $t_3 = 28.28$  min,  $t_4 = 30.46$  min. dr = 80:20 determined by  $^1\text{H}$  NMR.

$^1\text{H}$  NMR (400 MHz, Chloroform- $d$ )  $\delta = 7.47 - 7.43$  (m, 5H), 7.01 (d,  $J = 2.5$  Hz, 1H), 6.69 – 6.65 (m, 2H), 6.58 (d,  $J = 1.8$  Hz, 1H), 6.54 – 6.48 (m, 2H), 6.12 (d,  $J = 9.0$  Hz, 1H), 5.89 – 5.85 (m, 2H), 5.56 (d,  $J = 5.0$  Hz, 1H), 4.31 (d,  $J = 5.0$  Hz, 1H), 4.14 (t,  $J = 5.6$  Hz, 1H), 4.09 – 4.03 (m, 2H), 3.79 (s, 3H), 1.15 (t,  $J = 7.1$  Hz, 3H) ppm.

$^{13}\text{C}\{^1\text{H}\}$  NMR (101 MHz, Chloroform- $d$ )  $\delta = 169.6, 154.3, 147.6, 146.7, 139.0, 136.0, 133.4, 133.3, 129.8, 129.6, 128.8, 128.5, 128.2, 121.4, 113.7, 112.9, 111.2, 108.6, 108.1, 104.1, 102.8, 100.9, 60.8, 55.7, 47.1, 42.0, 14.1$  ppm.

IR (neat): 3066, 2989, 2927, 2861, 2835, 1733, 1646, 1615, 1482, 1444, 1400, 1247, 1172, 1037, 805, 763  $\nu$  ( $\text{cm}^{-1}$ )

HRMS (ESI-FT) calcd for  $\text{C}_{29}\text{H}_{26}\text{NO}_5^+$  ( $[\text{M}+\text{H}^+]$ ) = 468.1805, found 468.1798.

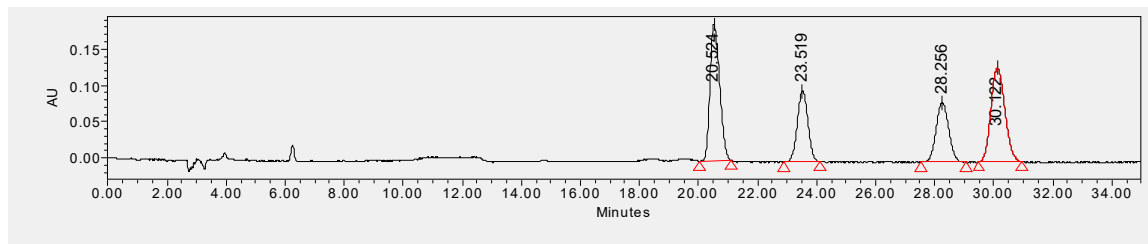

|   | Retention Time | Area    | % Area |
|---|----------------|---------|--------|
| 1 | 20.524         | 4239051 | 31.87  |
| 2 | 23.519         | 2399582 | 18.04  |
| 3 | 28.256         | 2417954 | 18.18  |
| 4 | 30.122         | 4246235 | 31.92  |

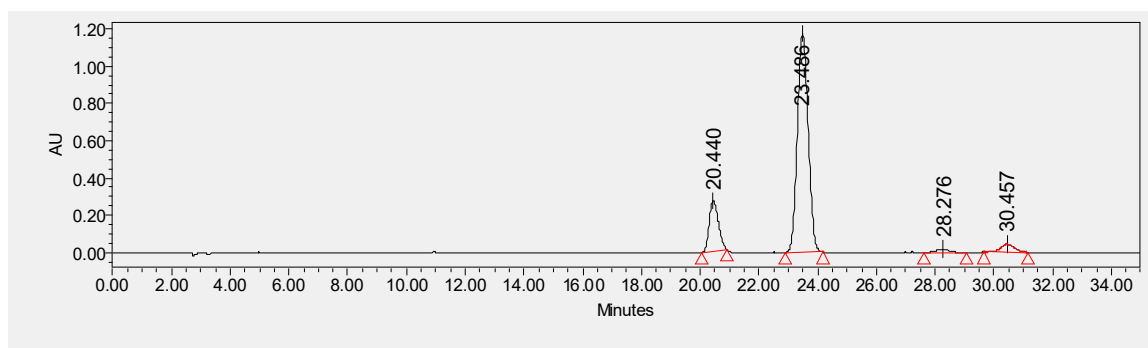

|   | Retention Time | Area     | % Area |
|---|----------------|----------|--------|
| 1 | 20.440         | 5961412  | 15.95  |
| 2 | 23.486         | 29529948 | 78.99  |
| 3 | 28.276         | 493001   | 1.32   |
| 4 | 30.457         | 1398476  | 3.74   |

ethyl (8*S*,9*S*)-8-(4-bromophenyl)-2-methyl-6-phenyl-8,9-dihydropyrido[1,2-*a*]indole-9-carboxylate **3z**

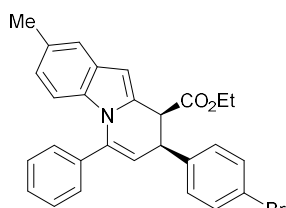

**3z**

Yellow solid, m.p.: 145-149 °C;  $R_f$  = 0.6 (petroleum ether/ethyl acetate = 6/1), 61% yield, 97% ee, 98:2 dr.  $[\alpha]_D^{25} = +40.8$  ( $c = 1.05$ , in  $\text{CH}_2\text{Cl}_2$ ,  $\lambda = 589$  nm).

Dissolved in *i*PrOH for UPC<sup>2</sup>; UPC<sup>2</sup> (Daicel CHIRALPAK OJH,  $\text{CO}_2/\text{CH}_3\text{OH} = 80/20$ , flow rate = 1 mL/min,  $\lambda = 254$  nm) retention time:  $t_1 = 9.78$  min,  $t_2 = 16.48$  min,  $t_3 = 17.80$  min,  $t_4 = 20.25$  min. dr = 98:2 determined by <sup>1</sup>H NMR.

<sup>1</sup>H NMR (400 MHz, Chloroform-*d*)  $\delta = 7.50 - 7.42$  (m, 5H), 7.38 - 7.31 (m, 3H), 6.96 - 6.88 (m, 2H), 6.71 (dd,  $J = 8.6, 1.8$  Hz, 1H), 6.69 (s, 1H), 6.14 (d,  $J = 8.5$  Hz, 1H), 5.58 (d,  $J = 5.2$  Hz, 1H), 4.37 (d,  $J = 5.9$  Hz, 1H), 4.18 (t,  $J = 5.6$  Hz, 1H), 4.05 (m, 2H), 2.38 (s, 3H), 1.14 (t,  $J = 7.1$  Hz, 3H) ppm.

<sup>13</sup>C NMR (101 MHz, Chloroform-*d*)  $\delta = 169.4, 139.4, 138.7, 135.9, 132.5, 131.5, 129.9, 129.7, 129.3, 128.8, 128.5, 128.1, 123.3, 121.2, 120.5, 112.7, 112.3, 104.2, 60.8, 46.6, 41.7, 21.1, 14.0$  ppm.

IR (neat): 3056, 3024, 2979, 2925, 2861, 1731, 1645, 1595, 1480, 1449, 1398, 1262, 1074, 871, 736  $\nu$  ( $\text{cm}^{-1}$ )

HRMS (ESI-FT) calcd for  $\text{C}_{28}\text{H}_{24}\text{NO}_2\text{Br}^+$  ( $[\text{M}+\text{H}^+]$ ) = 486.1064, found 486.1069.

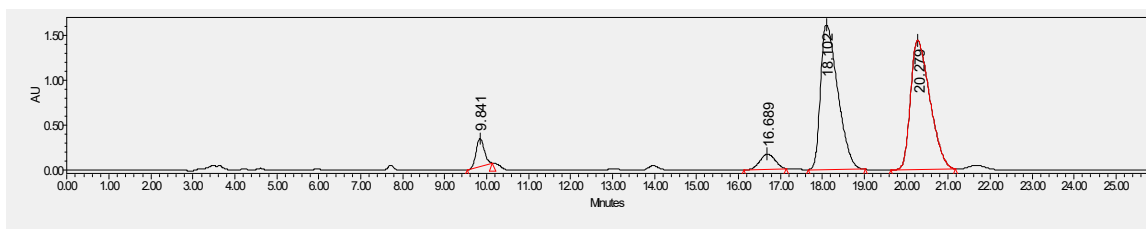

|   | Retention Time | Area     | % Area |
|---|----------------|----------|--------|
| 1 | 9.841          | 4195701  | 4.17   |
| 2 | 16.689         | 4234284  | 4.21   |
| 3 | 18.102         | 46057114 | 45.79  |
| 4 | 20.279         | 46094081 | 45.83  |

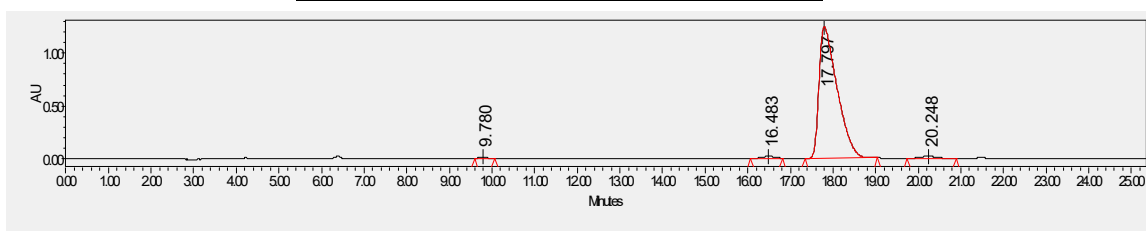

|   | Retention Time | Area     | % Area |
|---|----------------|----------|--------|
| 1 | 9.780          | 202592   | 0.54   |
| 2 | 16.483         | 432811   | 1.14   |
| 3 | 17.797         | 36616380 | 96.74  |
| 4 | 20.248         | 600454   | 1.59   |

**((8*S*,9*S*)-2-methoxy-6,8-diphenyl-8,9-dihydropyrido[1,2-*a*]indol-9-yl)methanol **4a****

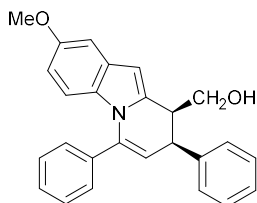

**4a**

Yellow oil;  $R_f = 0.2$  (petroleum ether/ethyl acetate = 6/1), 69% yield, 97% ee, 95:5 dr.  $[\alpha]_D^{20} = +25.9$  ( $c = 0.17$ , in  $\text{CH}_2\text{Cl}_2$ ,  $\lambda = 589$  nm).

Dissolved in *i*PrOH for UPC<sup>2</sup>; UPC<sup>2</sup> (Daicel CHIRALPAK ODH,  $\text{CO}_2/\text{CH}_3\text{OH} = 80/20$ , flow rate = 1 mL/min,  $\lambda = 254$  nm) retention time:  $t_1 = 35.13$  min,  $t_2 = 45.54$  min,  $t_3 = 49.57$  min,  $t_4 = 51.24$  min. dr = 95:5 determined by <sup>1</sup>H NMR.

<sup>1</sup>H NMR (400 MHz, Chloroform-*d*)  $\delta = 7.58 - 7.40$  (m, 5H), 7.24 – 7.17 (m, 3H), 7.00 (d,  $J = 2.5$  Hz, 1H), 6.98 – 6.90 (m, 2H), 6.53 (dd,  $J = 9.0, 2.6$  Hz, 1H), 6.34 (s, 1H), 6.19 (d,  $J = 9.1$  Hz, 1H), 5.71 (d,  $J = 6.0$  Hz, 1H), 4.08 – 4.01 (m, 1H), 3.98 (dd,  $J = 9.9, 6.3$  Hz, 1H), 3.81 (s, 3H) 3.67 – 3.49 (m, 2H), 1.55 (s, 1H).

<sup>13</sup>C NMR (101 MHz, Chloroform-*d*)  $\delta = 154.2, 139.2, 139.0, 137.3, 136.0, 129.9, 128.8, 128.5, 128.1, 127.0, 114.5, 113.6, 110.7, 102.5, 101.9, 61.2, 55.7, 42.1, 40.5$  ppm.

IR (neat): 3061, 3026, 2958, 2925, 2854, 1733, 1647, 1600, 1565, 1513, 1476, 1447, 1400, 1329, 1246, 1114, 1032, 844, 761  $\nu$  ( $\text{cm}^{-1}$ )

HRMS (ESI-FT) calcd for  $\text{C}_{26}\text{H}_{24}\text{NO}_2^+$  ( $[\text{M}+\text{H}]^+$ ) = 382.1802, found 382.1800.

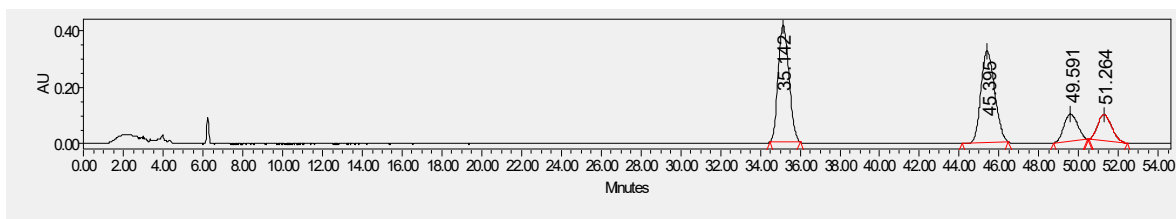

|  | Retention Time | Area | % Area |
|--|----------------|------|--------|
|--|----------------|------|--------|

|   |        |          |       |
|---|--------|----------|-------|
| 1 | 35.142 | 15719915 | 38.58 |
| 2 | 45.395 | 15710113 | 38.55 |
| 3 | 49.591 | 4657463  | 11.43 |
| 4 | 51.264 | 4659985  | 11.44 |

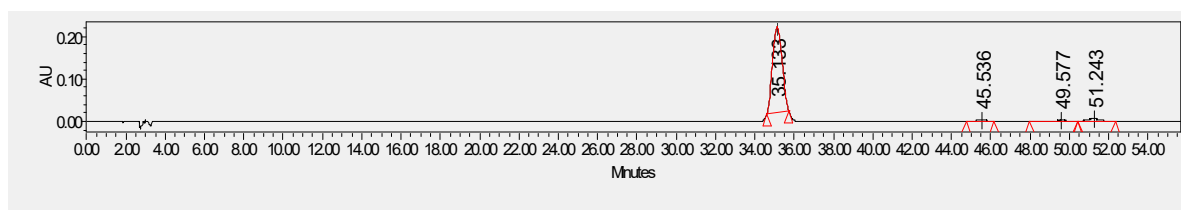

|   | Retention Time | Area    | % Area |
|---|----------------|---------|--------|
| 1 | 35.133         | 6938560 | 93.97  |
| 2 | 45.536         | 97778   | 1.32   |
| 3 | 49.577         | 80505   | 1.09   |
| 4 | 51.243         | 267337  | 3.62   |

**Methyl (8*S*,9*R*)-2-methoxy-6,8-diphenyl-8,9-dihydropyrido[1,2-*a*]indole-9-carboxylate 5b**

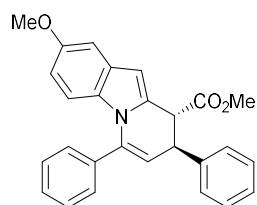

**5b**

Yellow oil;  $R_f = 0.6$  (petroleum ether/ethyl acetate = 6/1), 89% yield, 91% ee, 97:3 dr.  $[\alpha]_D^{15} = +46.7$  ( $c = 0.80$ , in  $\text{CH}_2\text{Cl}_2$ ,  $\lambda = 436$  nm).

Dissolved in *i*PrOH for UPC<sup>2</sup>; UPC<sup>2</sup> (Daicel CHIRALPAK OJ-3,  $\text{CO}_2/\text{CH}_3\text{OH} = 80/20$ , flow rate = 1.5 mL/min,  $\lambda = 254$  nm) retention time:  $t_1 = 3.74$  min,  $t_2 = 5.80$  min,  $t_3 = 9.00$  min,  $t_4 = 13.72$  min. dr = 97:3 determined by <sup>1</sup>H NMR.

**<sup>1</sup>H NMR** (600 MHz, Chloroform-*d*)  $\delta = 7.41 - 7.47$  (m, 5H), 7.26 - 7.21 (m, 3H), 7.16 (d,  $J = 7.7$  Hz, 2H), 6.98 (d,  $J = 2.4$  Hz, 1H), 6.52 (dd,  $J = 9.2, 2.4$  Hz, 1H), 6.33 (s, 1H), 6.17 (d,  $J = 9.1$  Hz, 1H), 5.50 (d,  $J = 4.8$  Hz, 1H), 4.24 - 4.18 (m, 1H), 4.14 (d,  $J = 7.0$  Hz, 1H), 3.78 (s, 3H), 3.69 (s, 3H) ppm.

**<sup>13</sup>C{<sup>1</sup>H} NMR** (151 MHz, Chloroform-*d*)  $\delta = 171.8, 154.4, 141.4, 139.2, 135.8, 133.7, 129.5, 129.0, 128.8, 128.8, 128.6, 128.2, 127.9, 127.3, 113.7, 113.3, 111.2, 103.4, 102.7, 55.7, 52.5, 49.0, 42.3$  ppm.

**IR** (neat): 3056, 3036, 2998, 2954, 2835, 1736, 1641, 1617, 1602, 1585, 1477, 1445, 1400, 1246, 1167, 1034, 915, 844, 732  $\nu$  ( $\text{cm}^{-1}$ )

**HRMS** (ESI-FT) calcd for  $\text{C}_{27}\text{H}_{24}\text{NO}_3^+$  ( $[\text{M}+\text{H}]^+$ ) = 410.1751, found 410.1750.

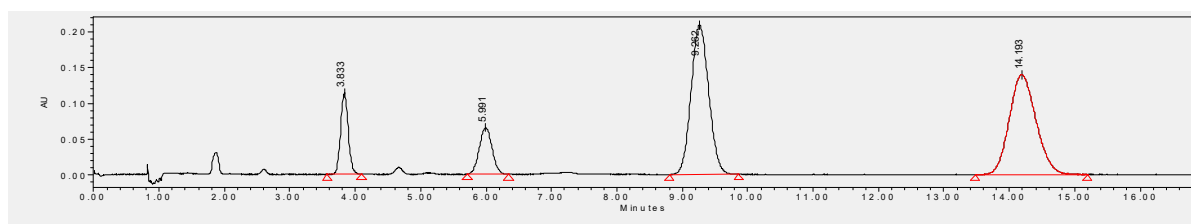

|   | Retention Time | Area    | % Area |
|---|----------------|---------|--------|
| 1 | 3.833          | 917915  | 9.44   |
| 2 | 5.991          | 884089  | 9.09   |
| 3 | 9.262          | 3941590 | 40.53  |
| 4 | 14.193         | 3981201 | 40.94  |

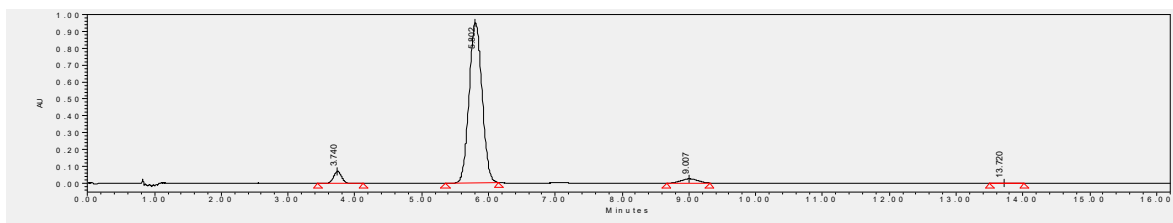

|   | Retention Time | Area     | % Area |
|---|----------------|----------|--------|
| 1 | 3.740          | 574638   | 4.16   |
| 2 | 5.802          | 12799467 | 92.64  |
| 3 | 9.007          | 432248   | 3.13   |
| 4 | 13.720         | 10225    | 0.07   |

Ethyl 6-methoxy-2,4-diphenyl-4,9-dihydro-3H-carbazole-1-carboxylate **6a**

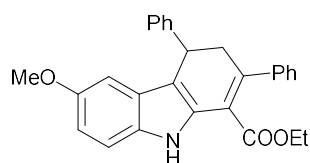

**6a**

<sup>1</sup>H NMR (400 MHz, Chloroform-*d*)  $\delta$  = 9.22 (s, 1H), 7.40 – 7.21 (m, 9H), 7.19 – 7.01 (m, 2H), 6.76 (dd, *J* = 8.8, 2.5 Hz, 1H), 6.30 (d, *J* = 2.5 Hz, 1H), 4.54 – 4.37 (m, 1H), 4.01 (dd, *J* = 7.2, 4.0 Hz, 2H), 3.60 (s, 3H), 3.23 (dd, *J* = 17.8, 8.0 Hz, 1H), 3.05 (dd, *J* = 17.8, 9.7 Hz, 1H), 0.84 (t, *J* = 7.1 Hz, 3H) ppm.

<sup>13</sup>C{<sup>1</sup>H} NMR (101 MHz, Chloroform-*d*)  $\delta$  = 167.2, 153.9, 146.5, 144.1, 141.8, 132.3, 131.7, 128.5, 127.9, 127.9, 127.5, 127.5, 126.6, 126.3, 112.3, 111.9,

111.4, 100.8, 60.7, 55.4, 43.3, 38.5, 13.3 ppm.

## 11. References

- [1] a) Y. H. Wen, X. Huang, J. L. Huang, Y. Xiong, B. Qin, X. M. Feng, *Synlett*. **2005**, 2445; b) K. Zheng, B. Qin, X. H. Liu, X. M. Feng, *J. Org. Chem.* **2007**, *72*, 8478; c) X. Zhang, D. H. Chen, X. H. Liu, X. M. Feng, *J. Org. Chem.* **2007**, *72*, 5227; d) Z. P. Yu, X. H. Liu, Z. H. Dong, M. S. Xie, X. M. Feng, *Angew. Chem. Int. Ed.* **2008**, *47*, 1308; *Angew. Chem.* **2008**, *120*, 1328; e) X. Zhou, D. J. Shang, Q. Zhang, L. L. Lin, X. H. Liu, X. M. Feng, *Org. Lett.* **2009**, *11*, 1401.
- [2] a) D.-L. Mo, D. A. Wink, L. L. Anderson, *Chem. Eur. J.* **2014**, *20*, 13217; b) W. H. Pace, D.-L. Mo, T. W. Reidl, D. J. Wink, L. L. Anderson, *Angew. Chem., Int. Ed.* **2016**, *55*, 9183; c) M. A. Kroc, A. Prajapati, D. J. Wink, L. L. Anderson, *J. Org. Chem.* **2018**, *83*, 1085; d) M. A. Kroc, M. Markiewicz, W. H. Pace, D. J. Wink, L. L. Anderson, *Chem. Commun.* **2019**, *55*, 2309
- [3] a) R. W. Lang, H. J. Hansen, *Helvetica Chimica Acta*, **1980**, *63*, 438; b) Z. Huang, X. Yang, F. Yang, T. Lu, Q. Zhou, *Org. Lett.*, 2017, *19*, 3524. c) L. Rout, A. M. Harned, *Chem. Eur. J.* **2009**, *15*, 12926. d) P. Maity, S. D. Lepore, *J. Org. Chem.* **2009**, *74*, 158. e) D.-L. Mo, D. A. Wink, L. L. Anderson, *Chem. Eur. J.* **2014**, *20*, 13217; d) G. Wang, X. Liu, Y. Chen, J. Yang, J. Li, L. Lin, X. Feng, *ACS Catal.* **2016**, *6*, 2482-2486.

## 12. Copies of NMR spectra for products

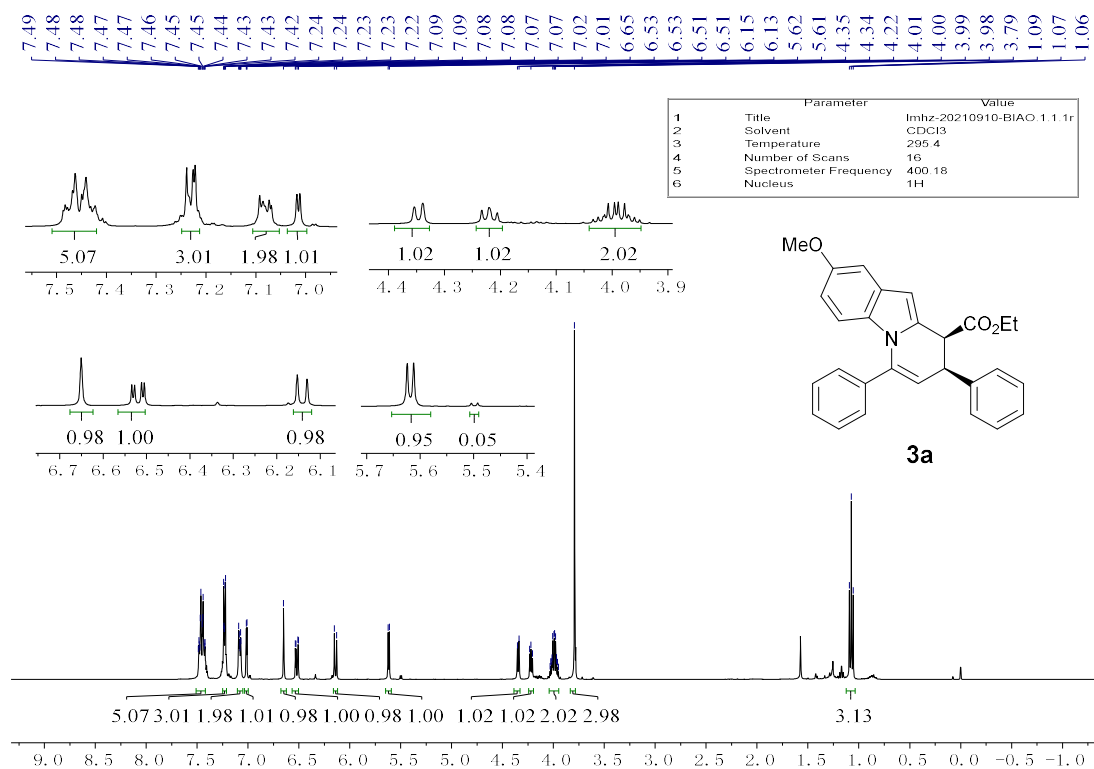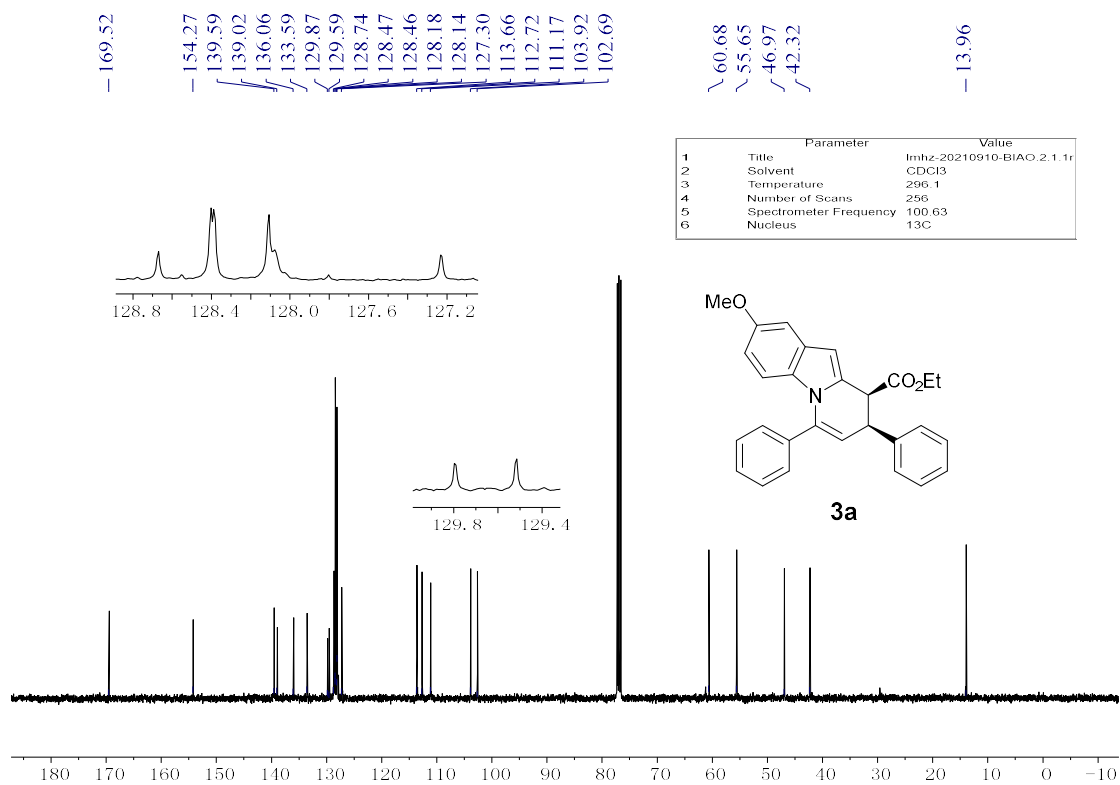



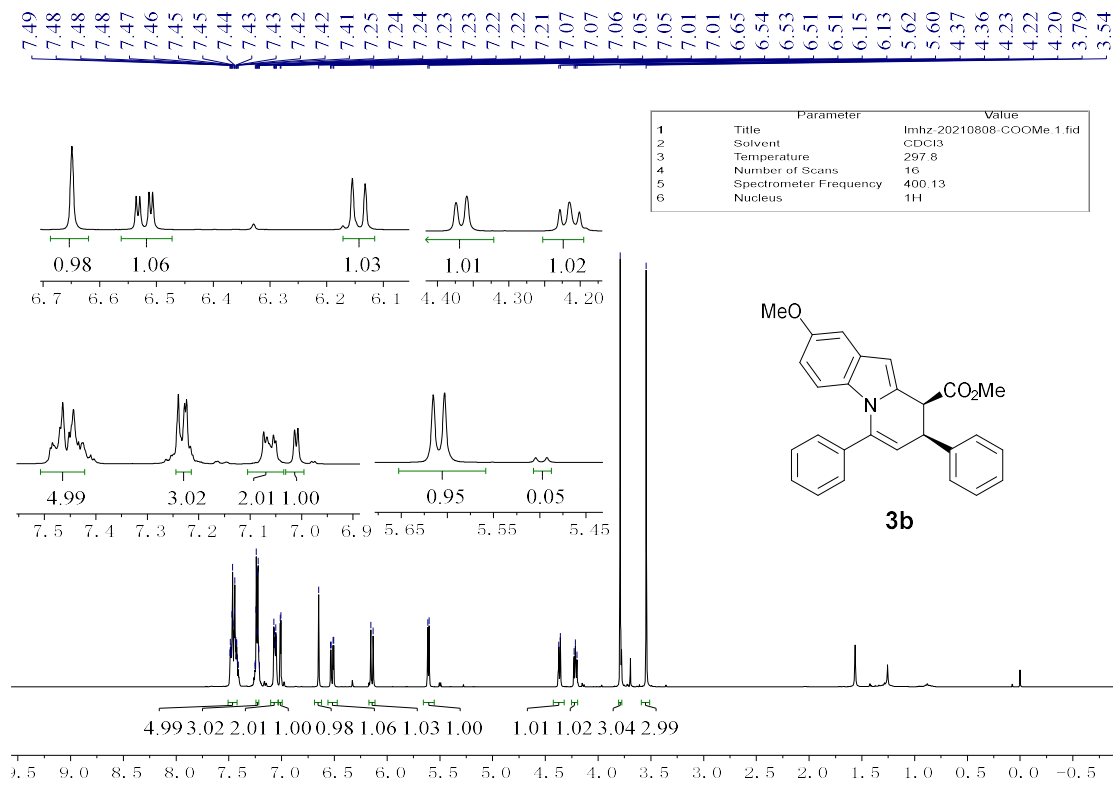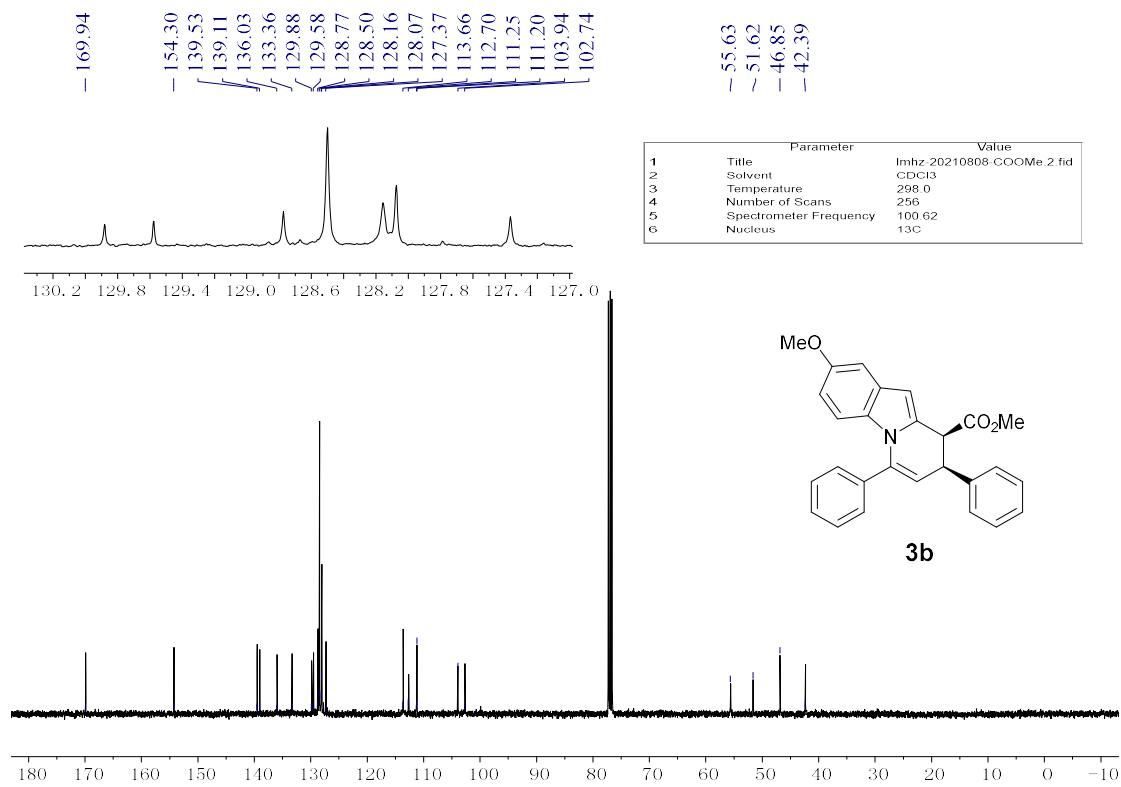

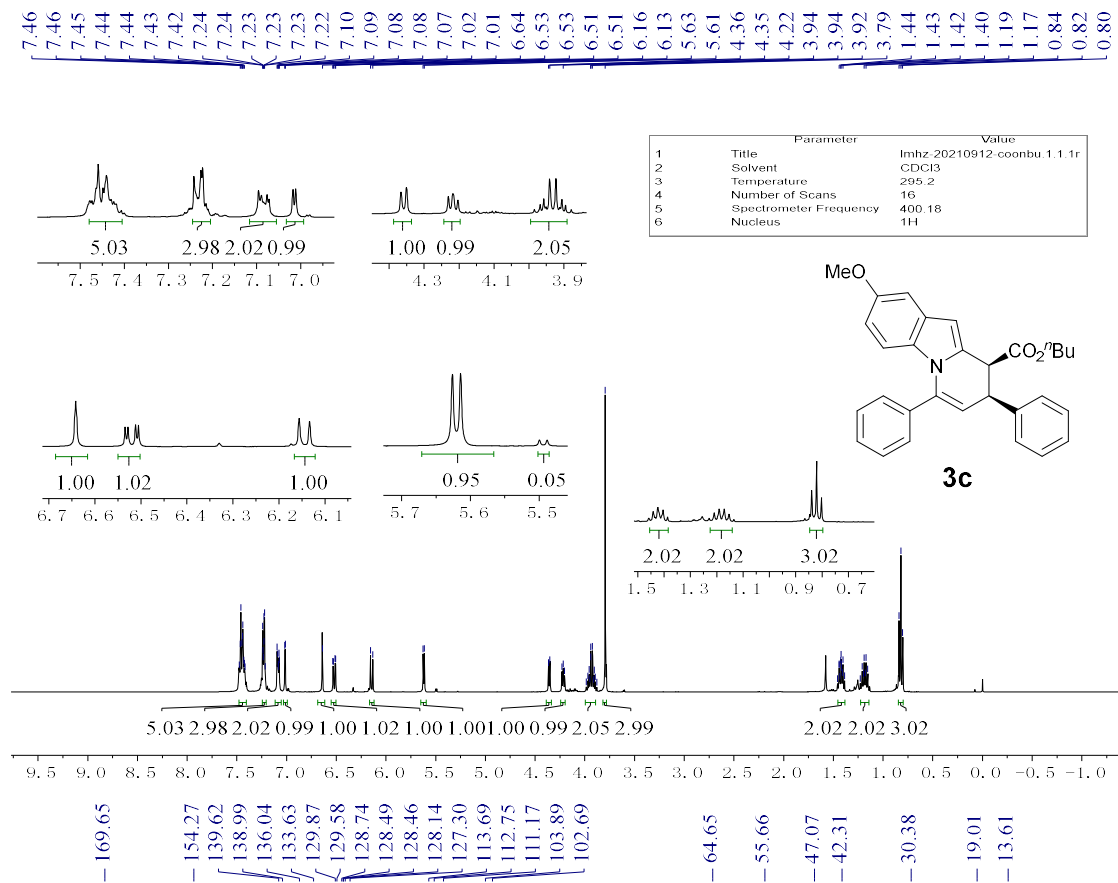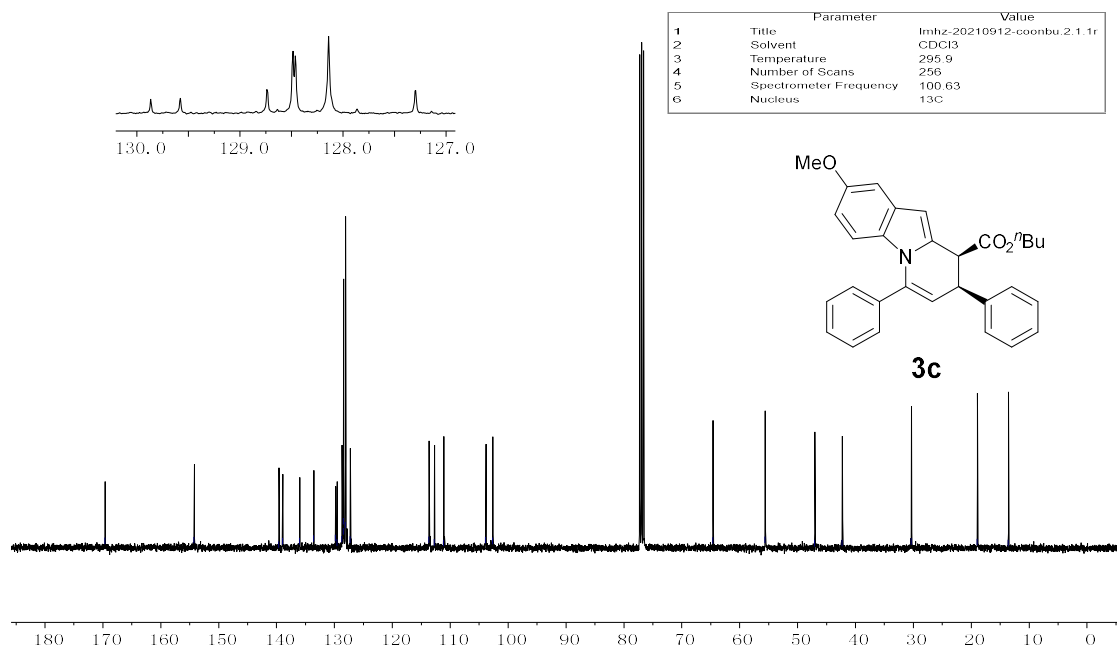

7.49  
7.49  
7.48  
7.47  
7.47  
7.45  
7.45  
7.44  
7.43  
7.24  
7.23  
7.22  
7.22  
7.09  
7.08  
7.07  
7.06  
7.02  
7.01  
6.68  
6.54  
6.53  
6.52  
6.51  
6.15  
6.13  
5.62  
5.61  
4.58  
4.57  
4.53  
4.53  
4.42  
4.41  
4.26  
4.25  
4.23  
3.79  
3.78  
2.42  
2.41

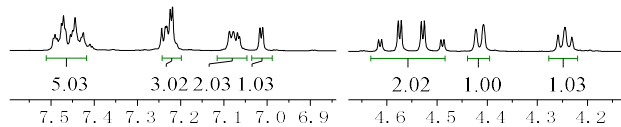

| Parameter                | Value                      |
|--------------------------|----------------------------|
| 1 Title                  | Imhz-20210804-COOeni.1.fid |
| 2 Solvent                | CDCl3                      |
| 3 Temperature            | 298.6                      |
| 4 Number of Scans        | 16                         |
| 5 Spectrometer Frequency | 400.13                     |
| 6 Nucleus                | 1H                         |

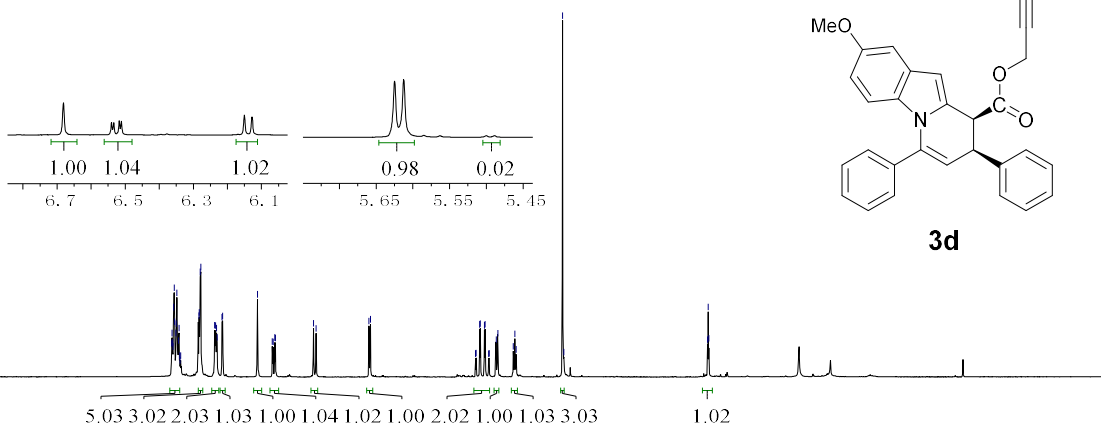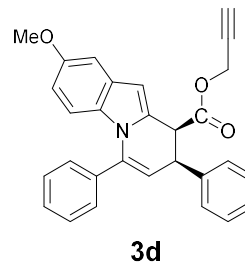

168.64  
154.34  
139.18  
139.16  
135.96  
132.77  
129.92  
129.58  
128.82  
128.57  
128.48  
128.22  
128.18  
127.46  
113.68  
112.55  
111.38  
104.26  
104.24  
102.77  
75.15  
75.11  
55.61  
52.13  
46.73  
42.32

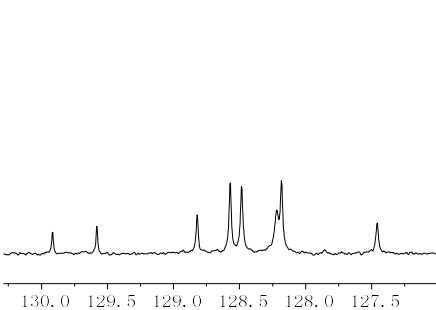

| Parameter                | Value                      |
|--------------------------|----------------------------|
| 1 Title                  | Imhz-20210804-COOeni.2.fid |
| 2 Solvent                | CDCl3                      |
| 3 Temperature            | 298.8                      |
| 4 Number of Scans        | 256                        |
| 5 Spectrometer Frequency | 100.62                     |
| 6 Nucleus                | 13C                        |

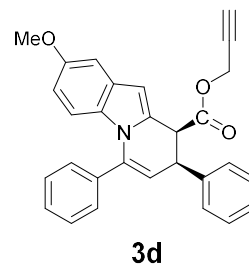

90 180 170 160 150 140 130 120 110 100 90 80 70 60 50 40 30 20 10 0 -

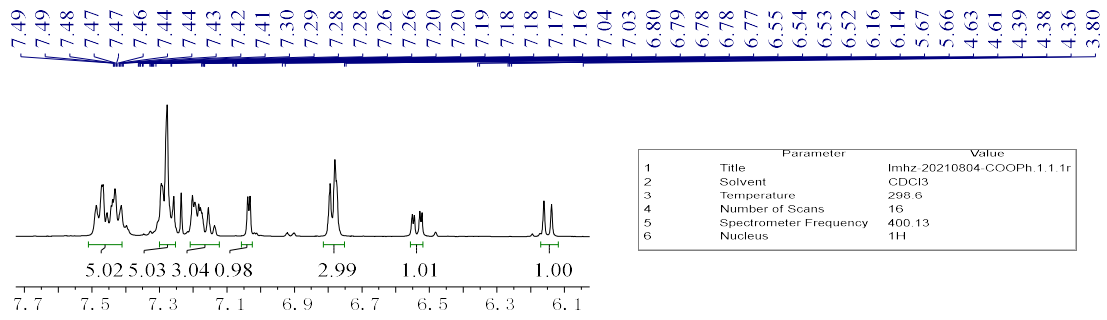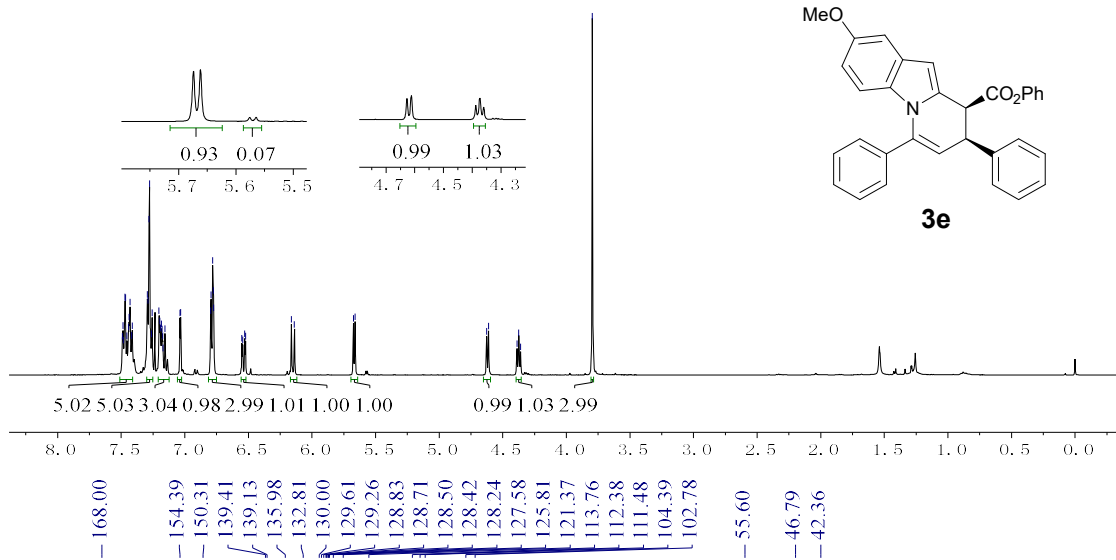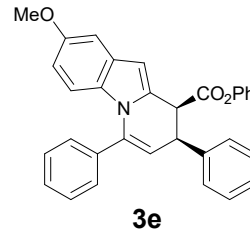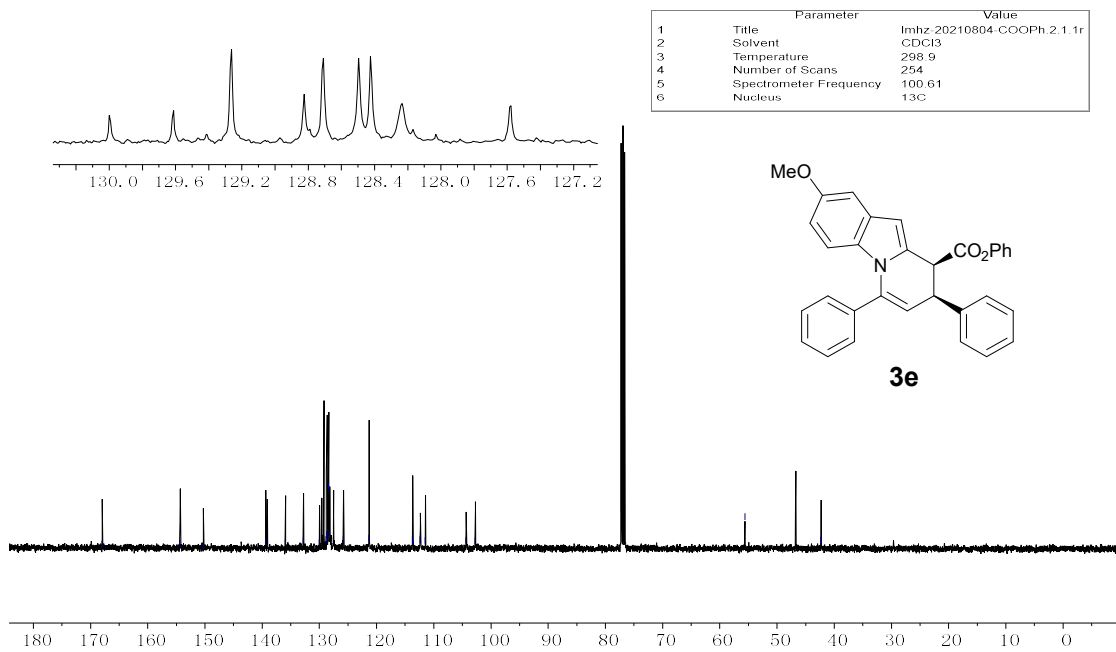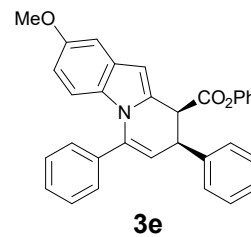

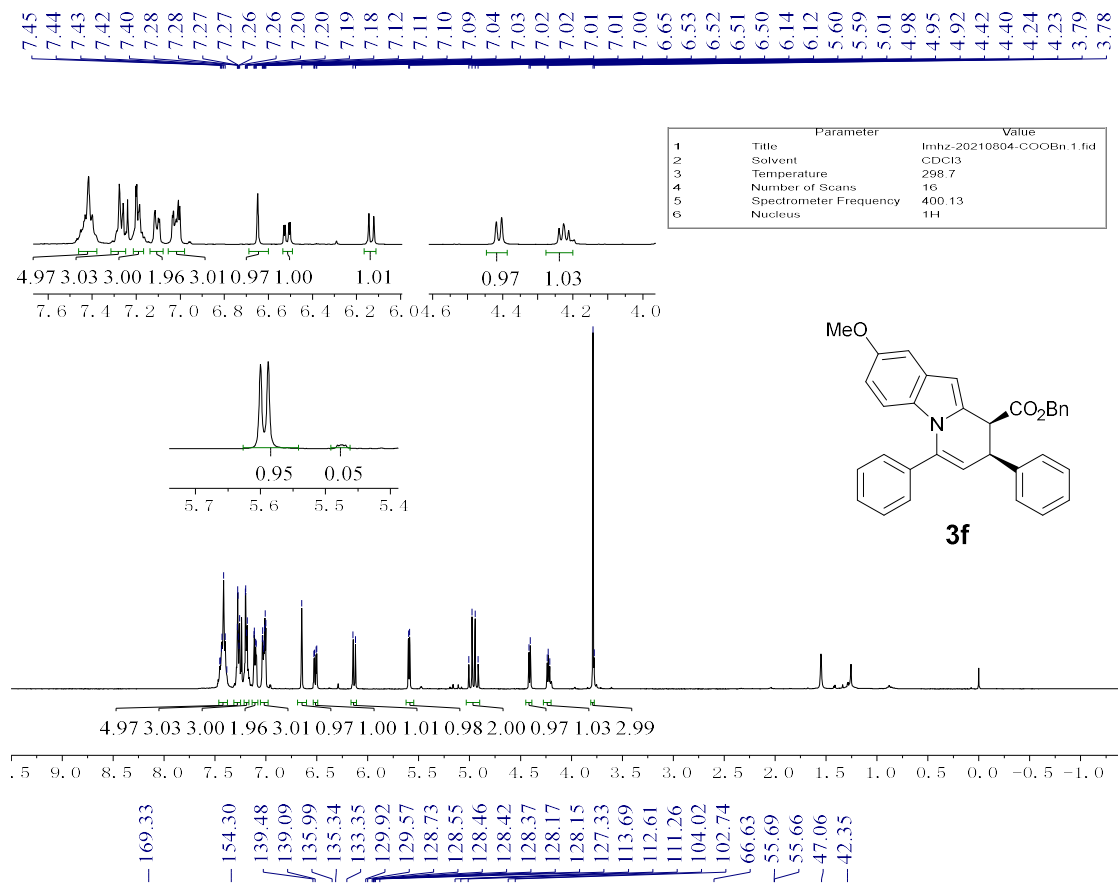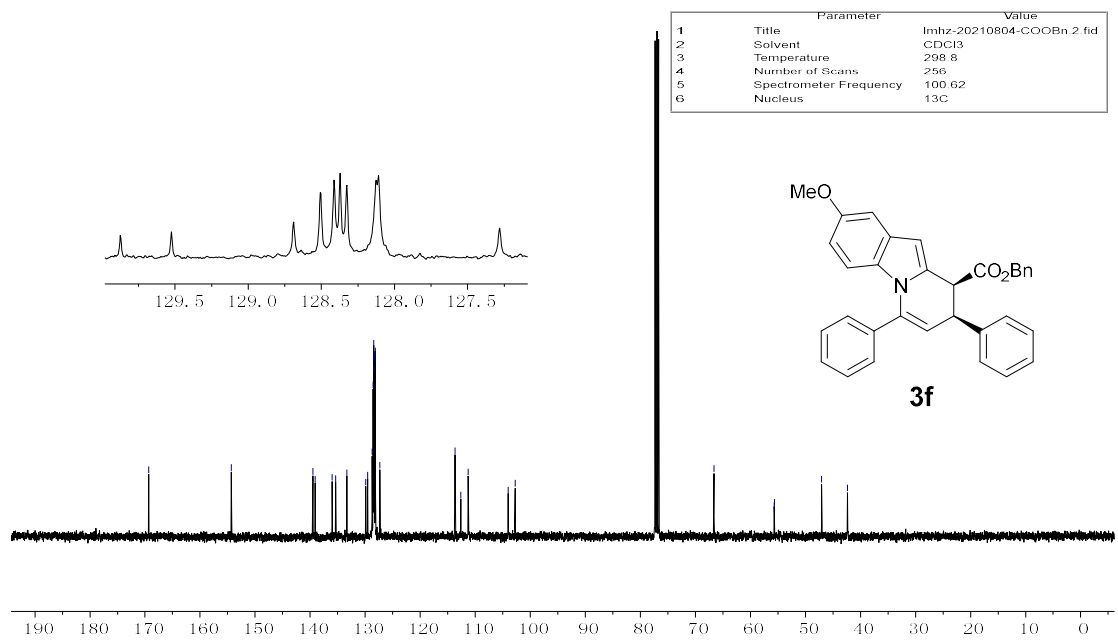

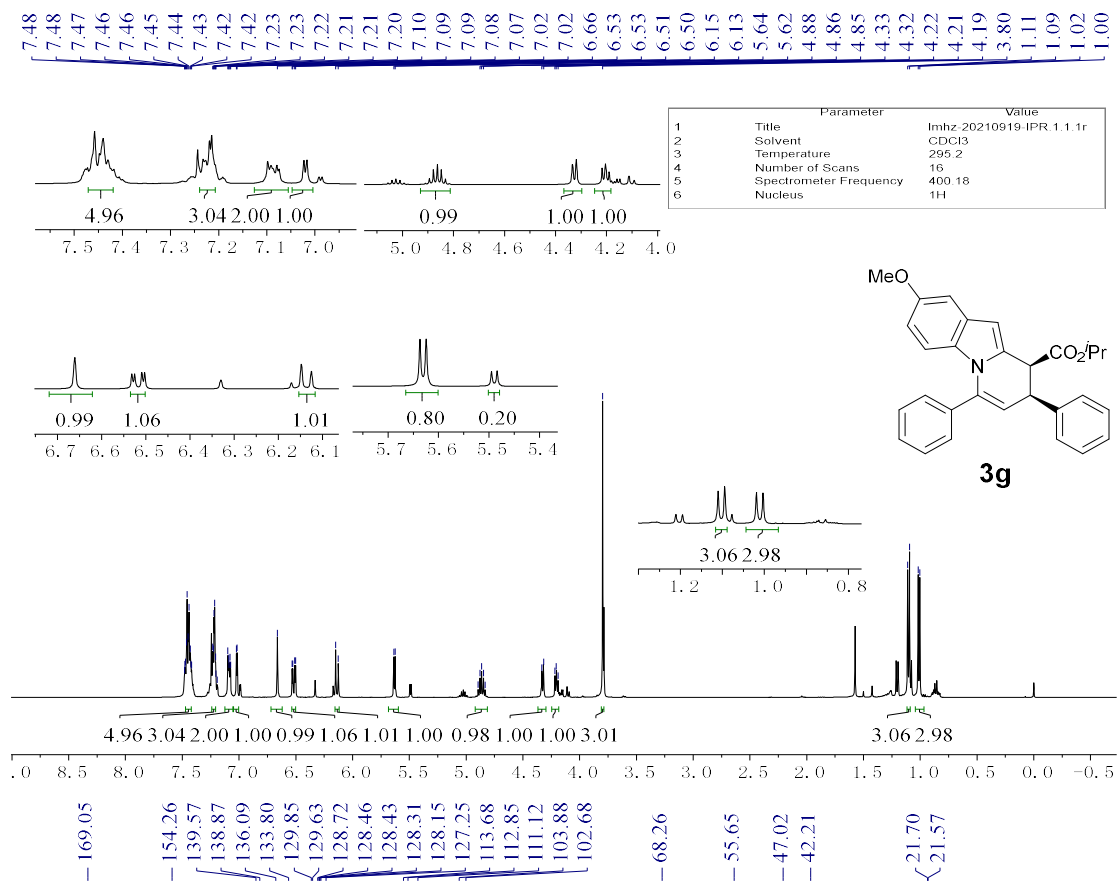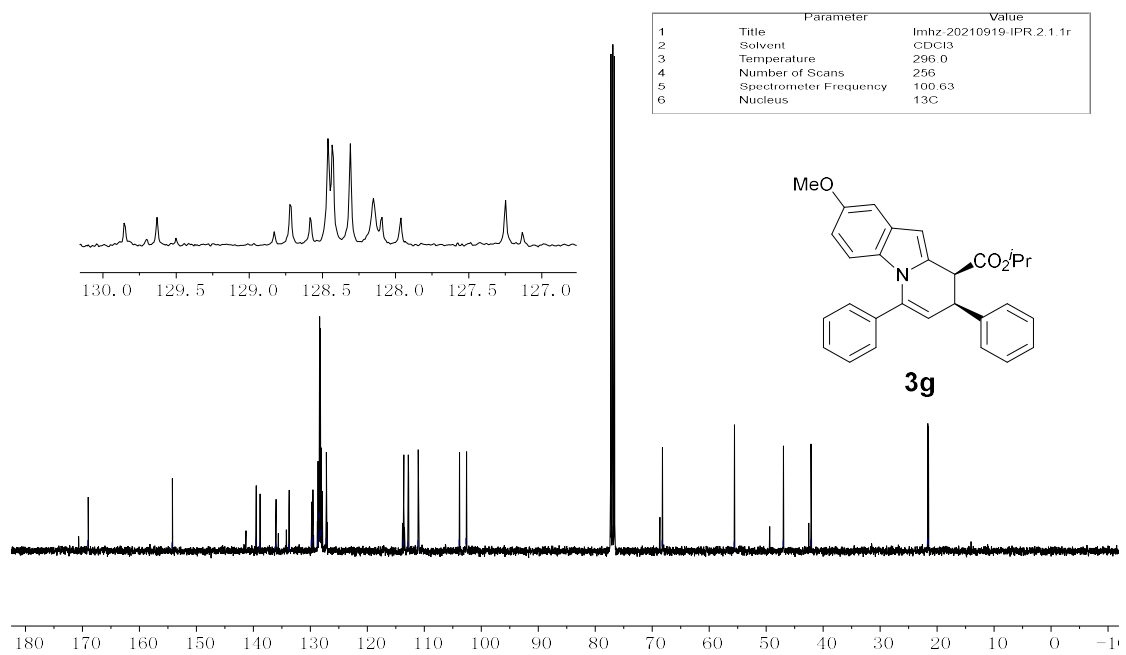

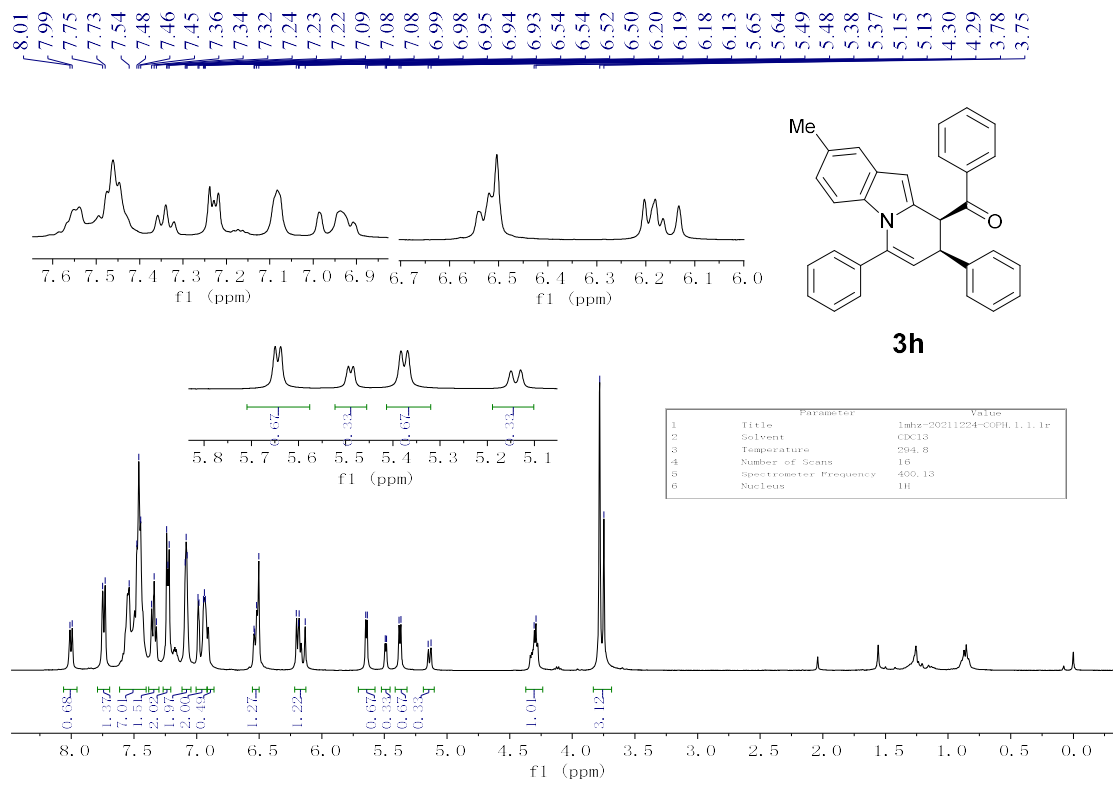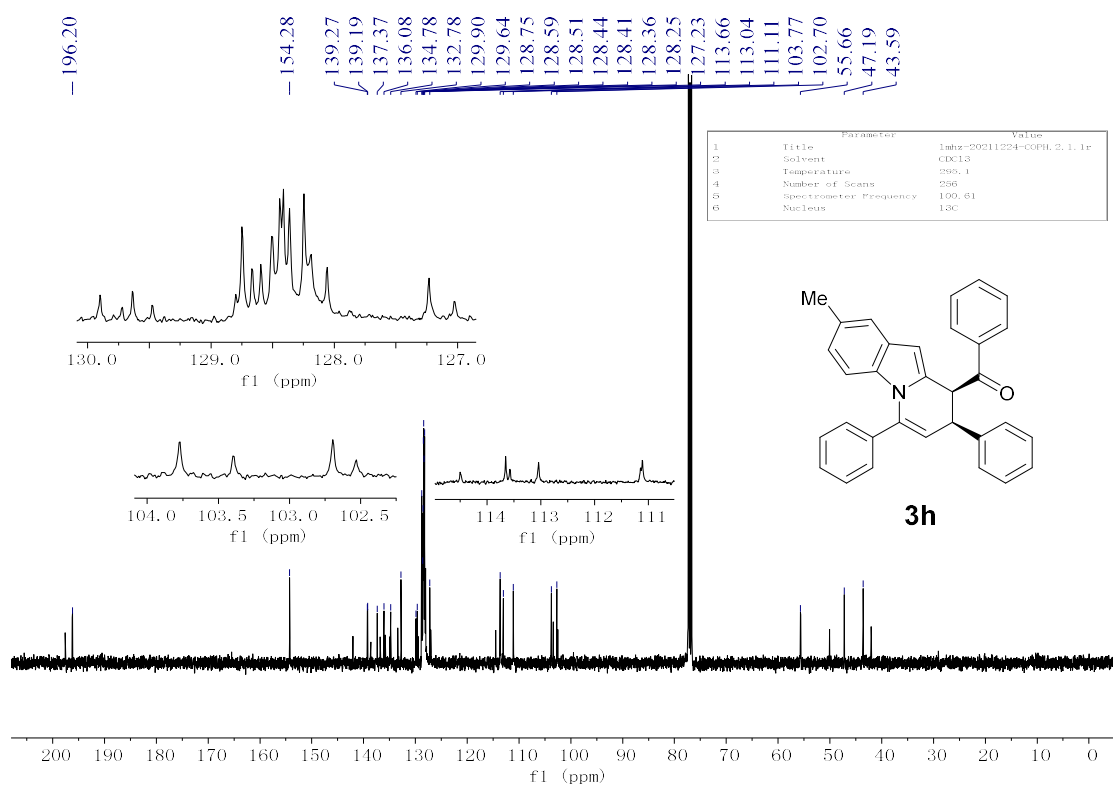

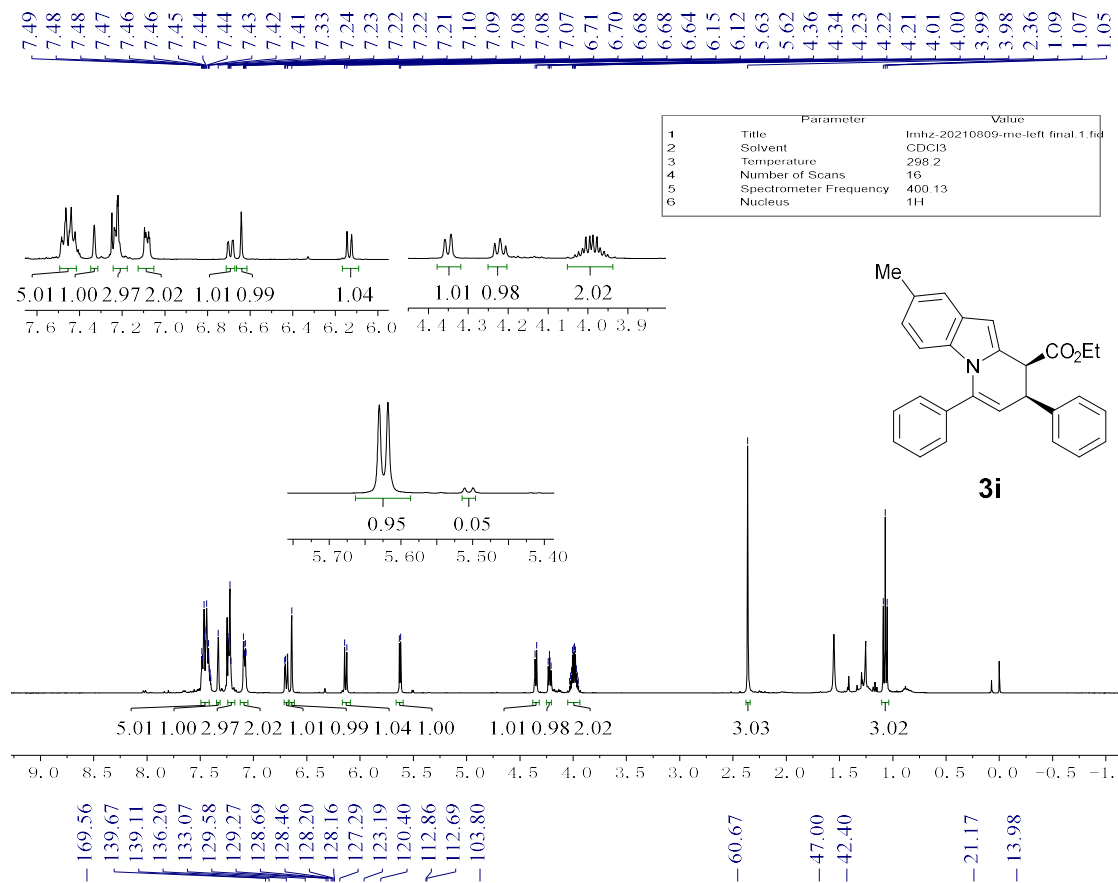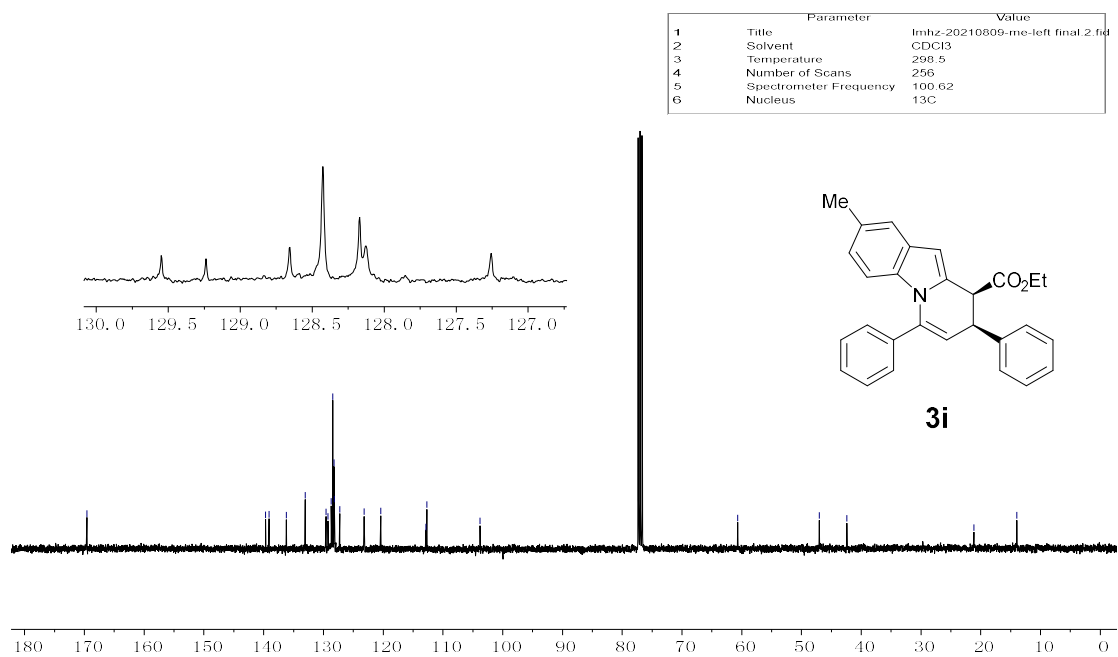



7.54  
7.54  
7.51  
7.50  
7.49  
7.48  
7.47  
7.46  
7.45  
7.44  
7.43  
7.43  
7.42  
7.41  
7.24  
7.23  
7.13  
7.12  
7.11  
7.10  
6.96  
6.95  
6.94  
6.93  
6.67  
6.18  
6.16  
5.59  
5.58  
4.36  
4.35  
4.22  
4.21  
4.19  
3.99  
3.98  
3.96  
1.32  
1.31  
1.08  
1.06  
1.05

|   | Parameter              | Value                     |
|---|------------------------|---------------------------|
| 1 | Title                  | Imhz-20210803-4-tbu.1.fid |
| 2 | Solvent                | CDCl3                     |
| 3 | Temperature            | 298.5                     |
| 4 | Number of Scans        | 16                        |
| 5 | Spectrometer Frequency | 400.13                    |
| 6 | Nucleus                | 1H                        |

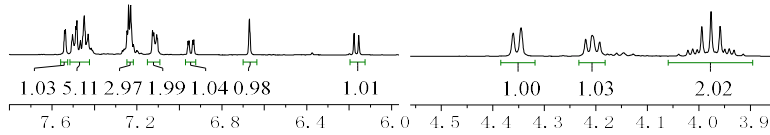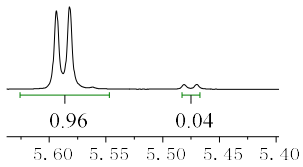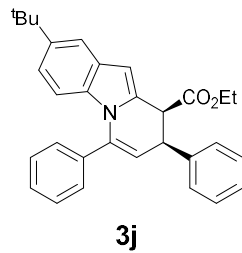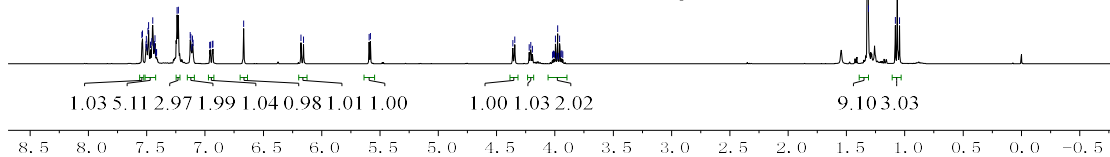

169.57  
143.16  
139.75  
139.18  
136.28  
133.01  
128.82  
128.68  
128.45  
128.29  
128.21  
127.27  
119.91  
116.63  
112.53  
112.46  
104.26

60.65  
47.03  
42.45  
34.40  
31.75  
13.98

|   | Parameter              | Value                     |
|---|------------------------|---------------------------|
| 1 | Title                  | Imhz-20210803-4-tbu.2.fid |
| 2 | Solvent                | CDCl3                     |
| 3 | Temperature            | 298.7                     |
| 4 | Number of Scans        | 256                       |
| 5 | Spectrometer Frequency | 100.62                    |
| 6 | Nucleus                | 13C                       |

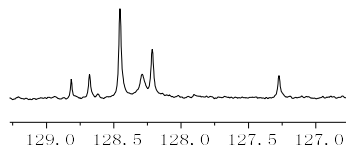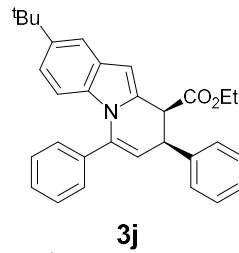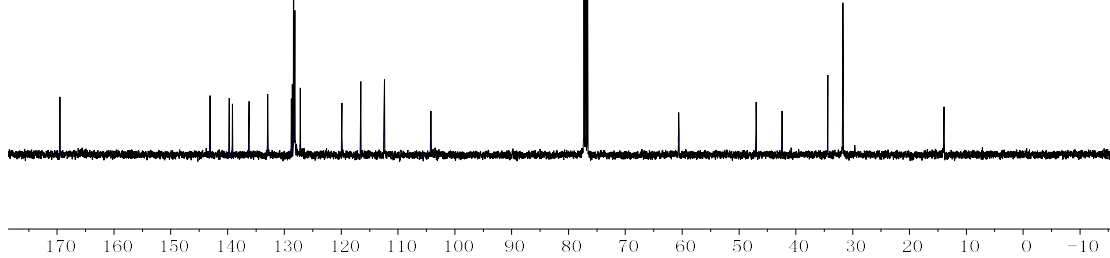

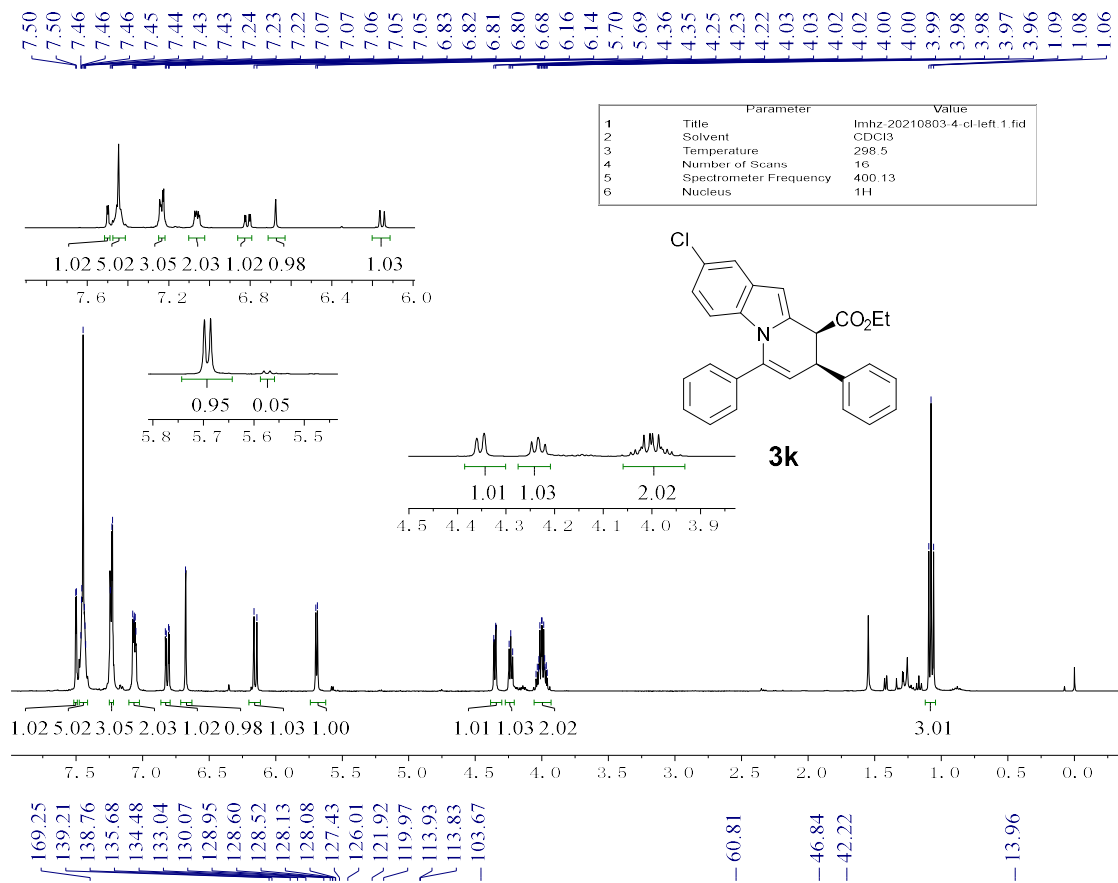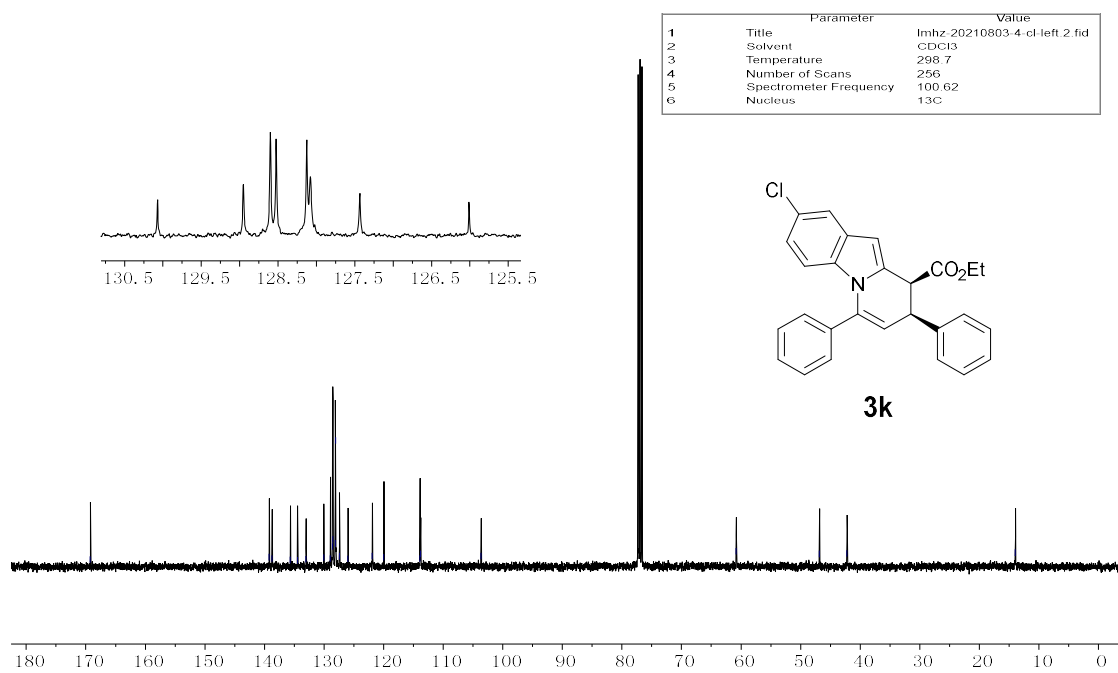

7.66  
7.46  
7.45  
7.44  
7.43  
7.43  
7.24  
7.24  
7.23  
7.22  
7.07  
7.06  
7.05  
7.04  
6.96  
6.95  
6.94  
6.93  
6.68  
6.12  
6.10  
5.70  
5.69  
4.36  
4.35  
4.25  
4.23  
4.22  
4.04  
4.03  
4.03  
4.02  
4.02  
4.00  
4.00  
3.99  
3.98  
3.98  
3.97  
3.96  
1.09  
1.08  
1.06

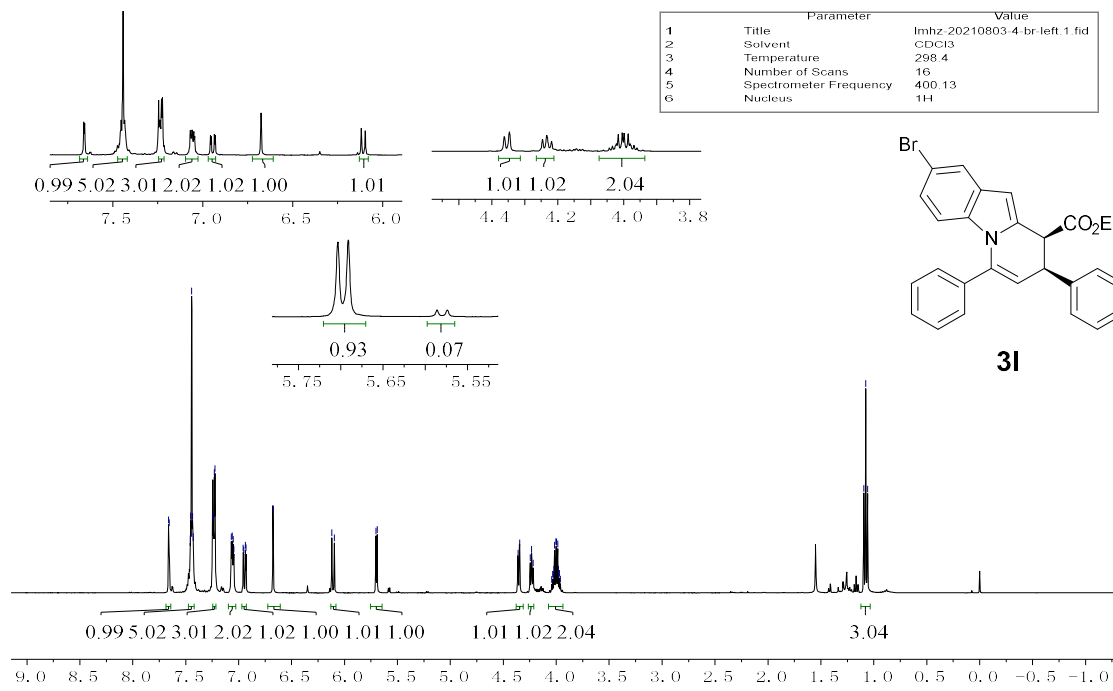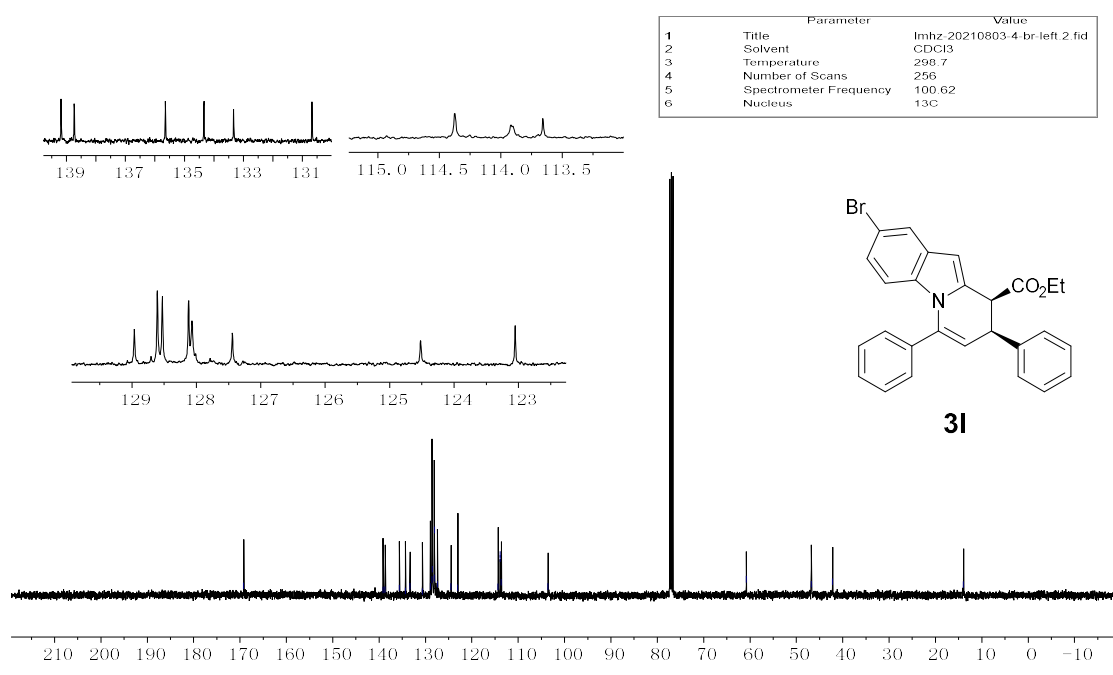

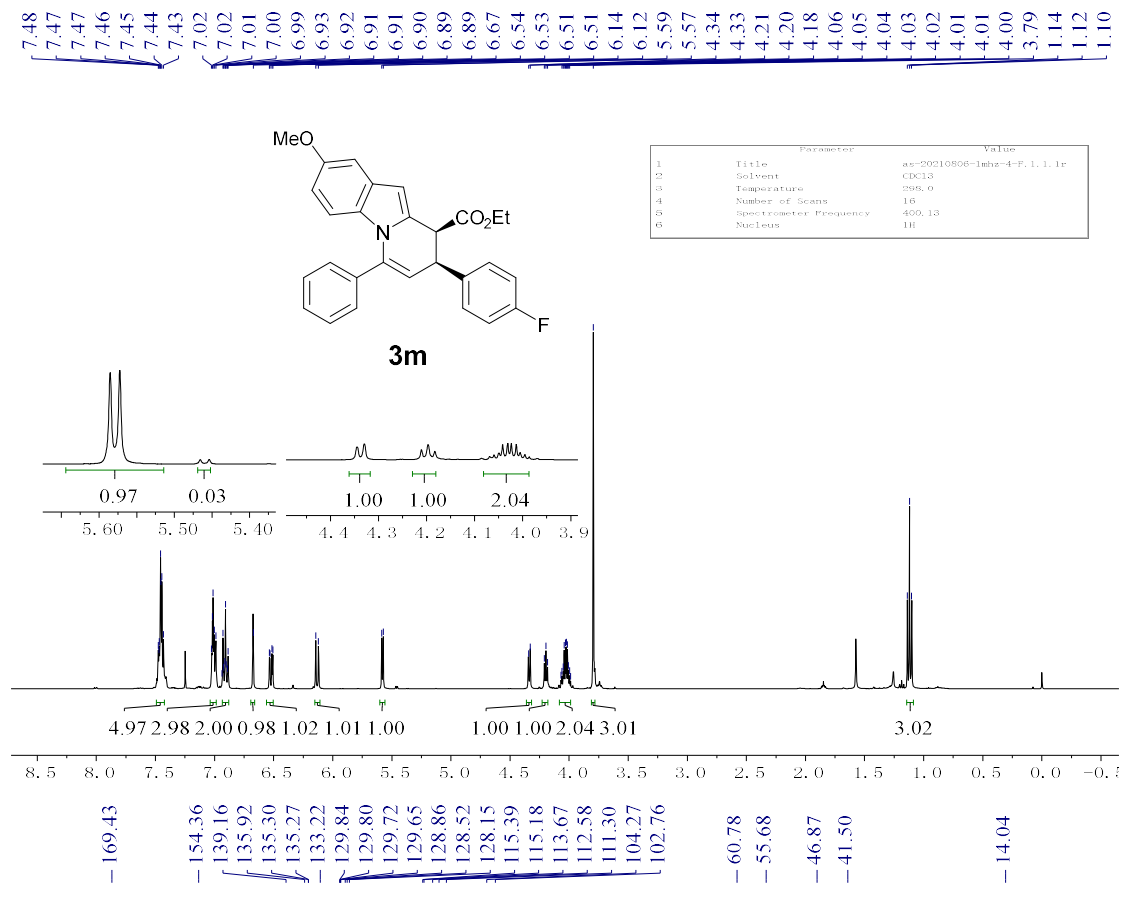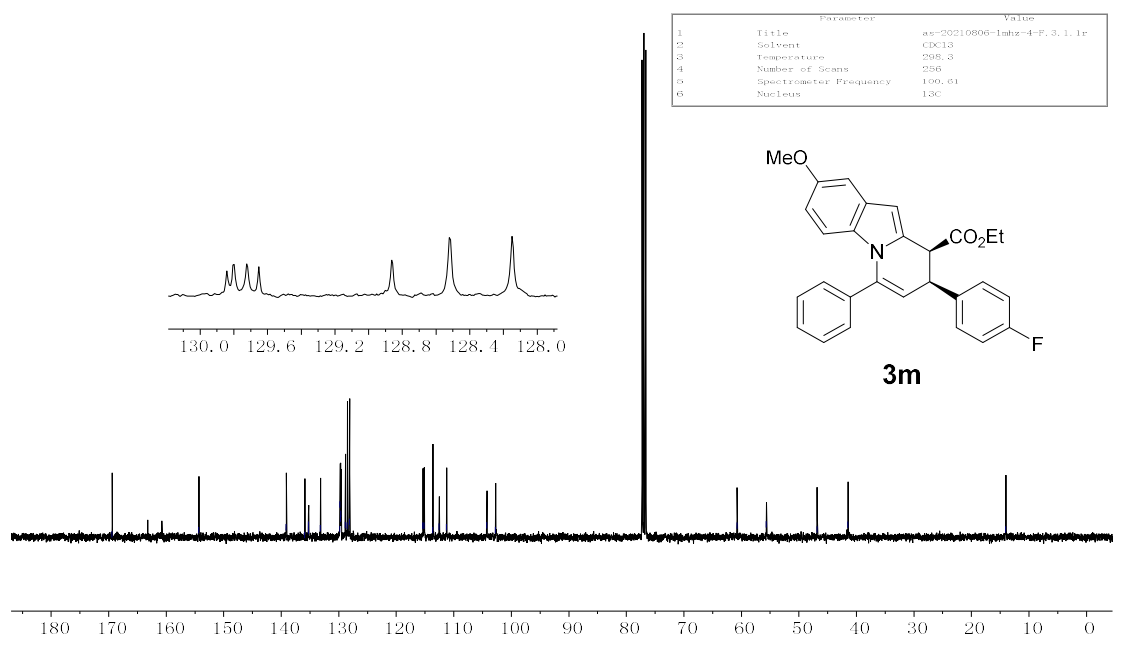

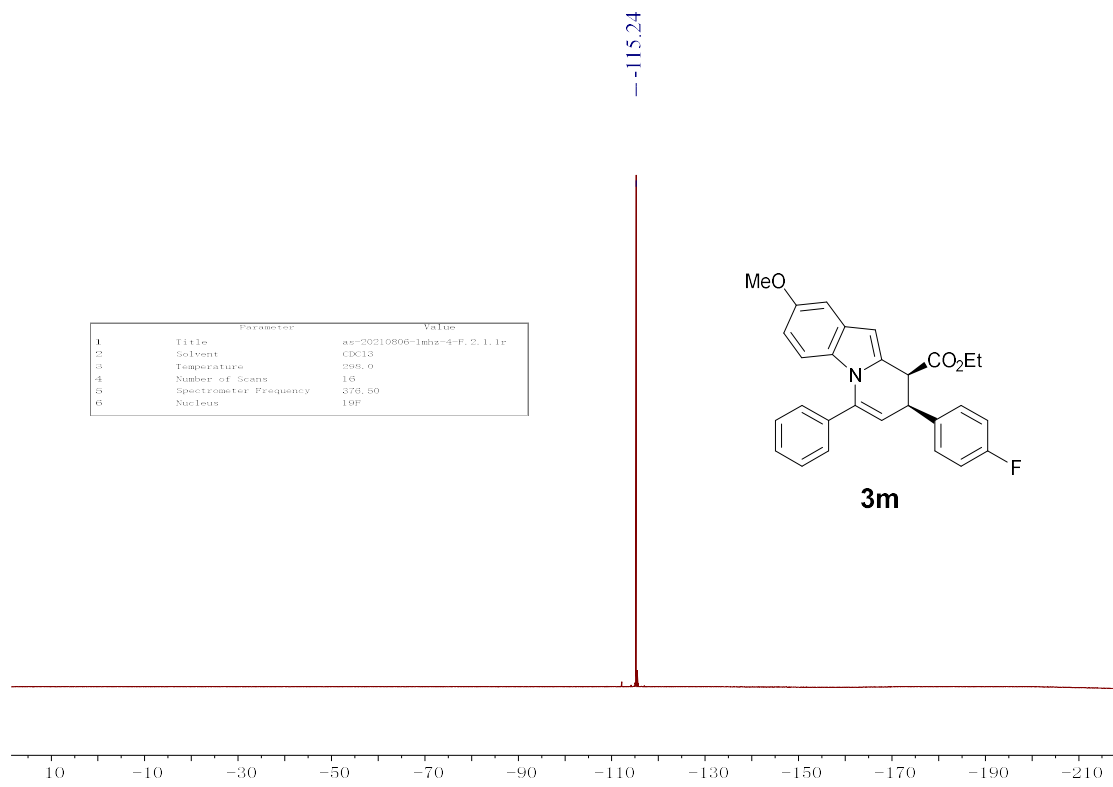

|   | Parameter              | Value                          |
|---|------------------------|--------------------------------|
| 1 | Title                  | as-20210806-1mhz-4-F, 2: 1, 1r |
| 2 | Solvent                | CDCl3                          |
| 3 | Temperature            | 295.0                          |
| 4 | Number of Scans        | 16                             |
| 5 | Spectrometer Frequency | 376.80                         |
| 6 | Nucleus                | 19F                            |

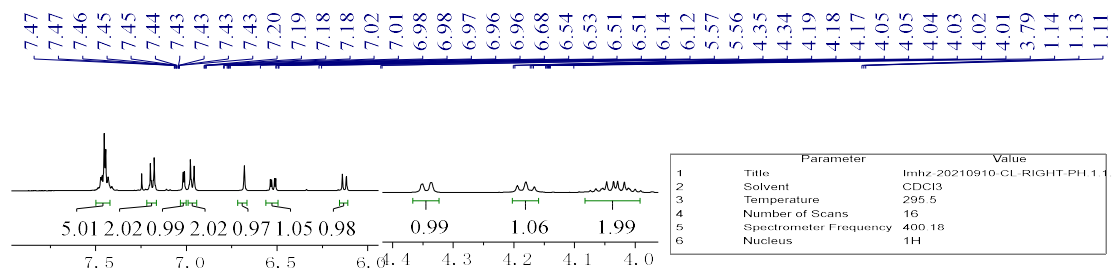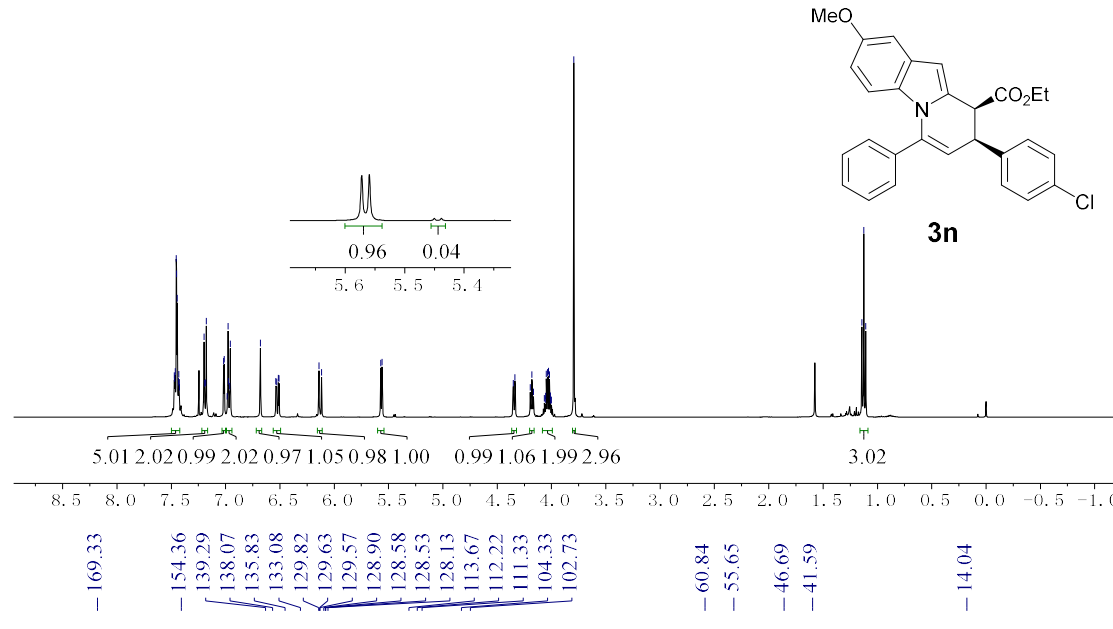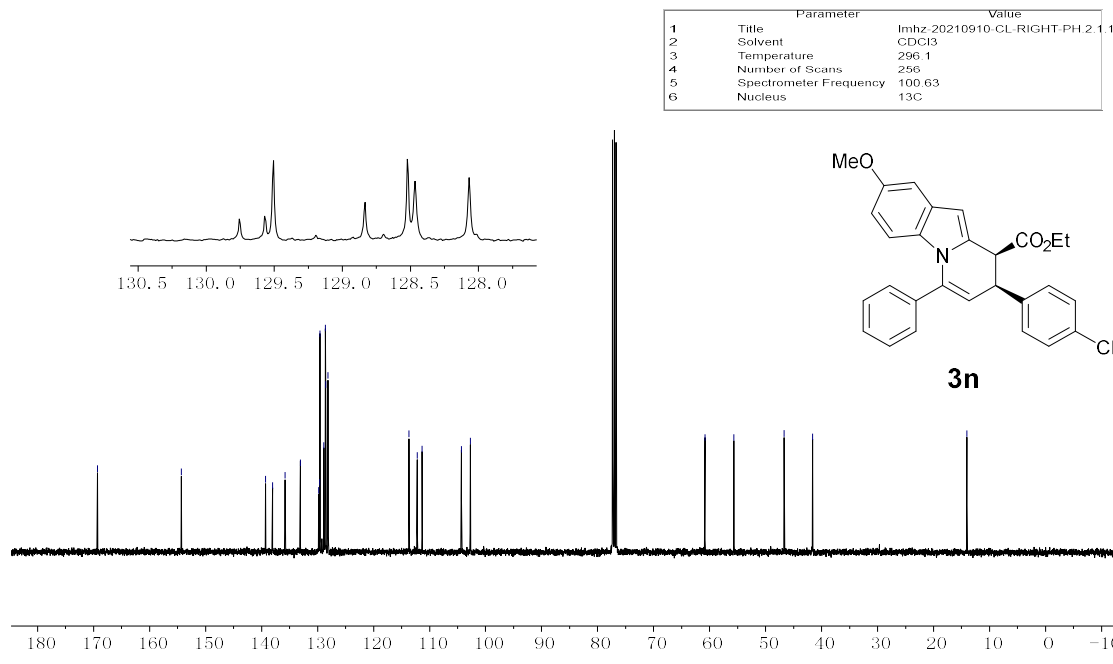

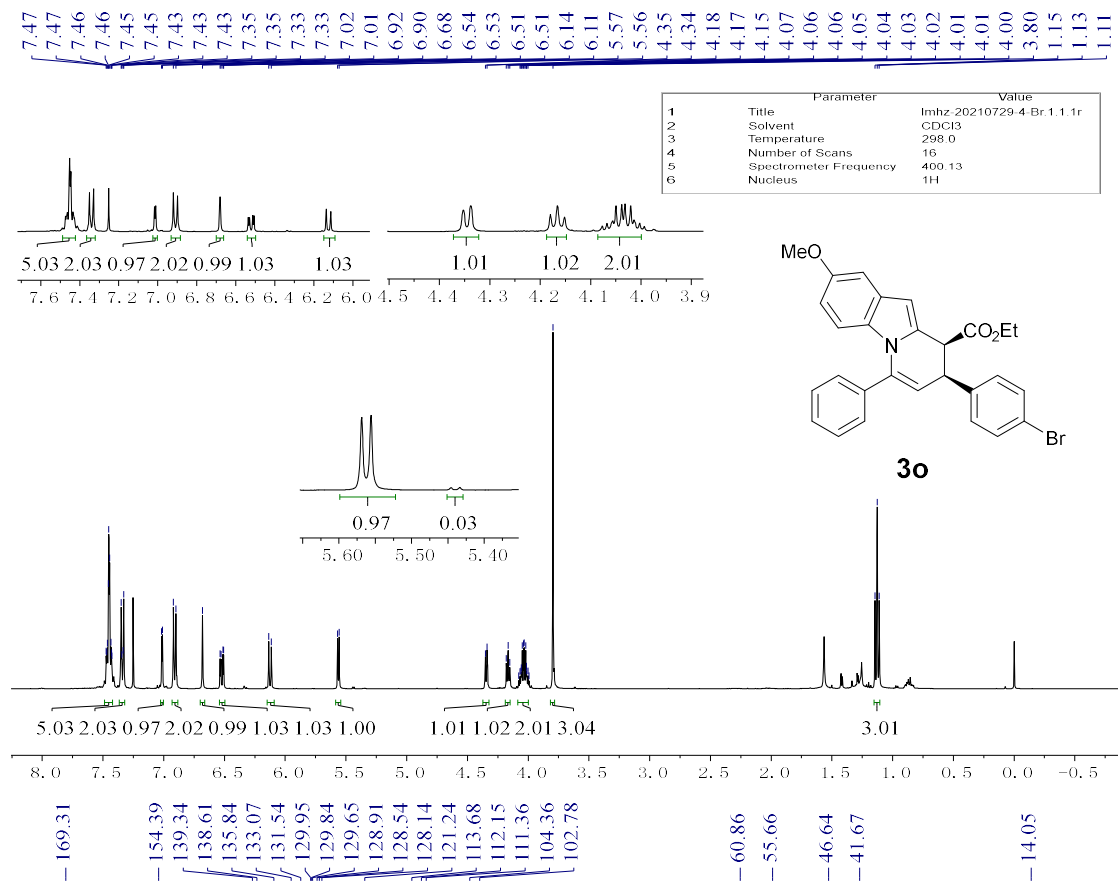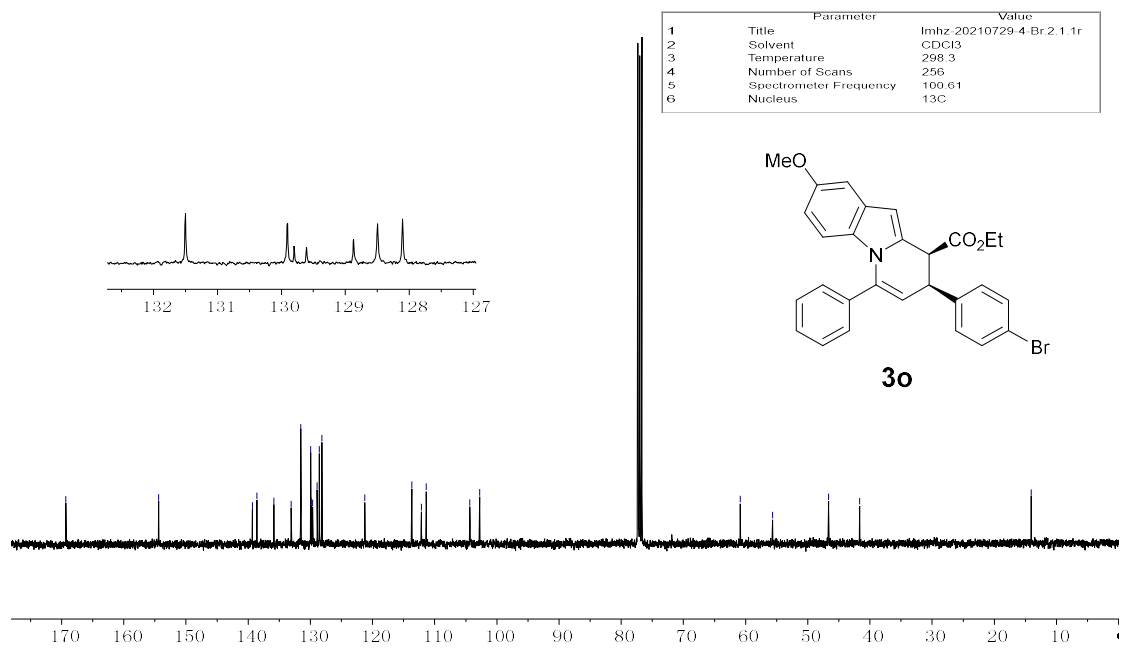

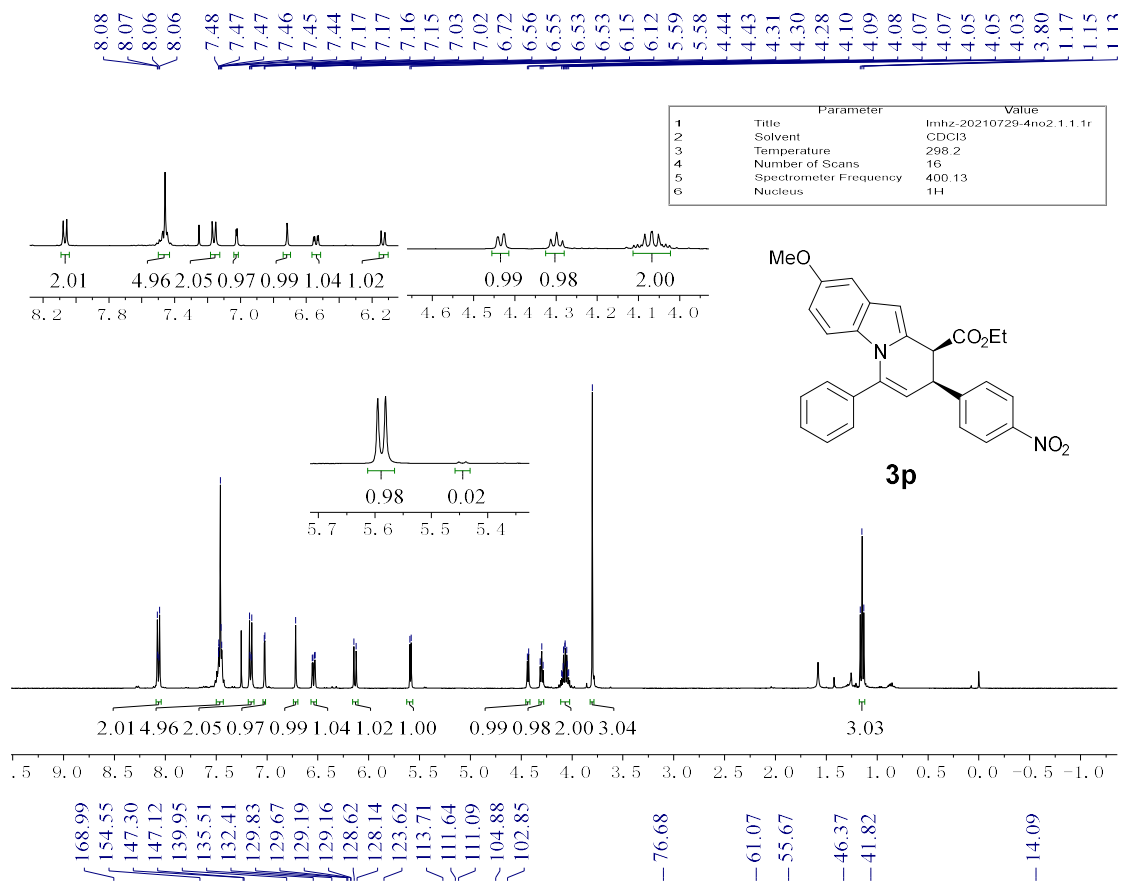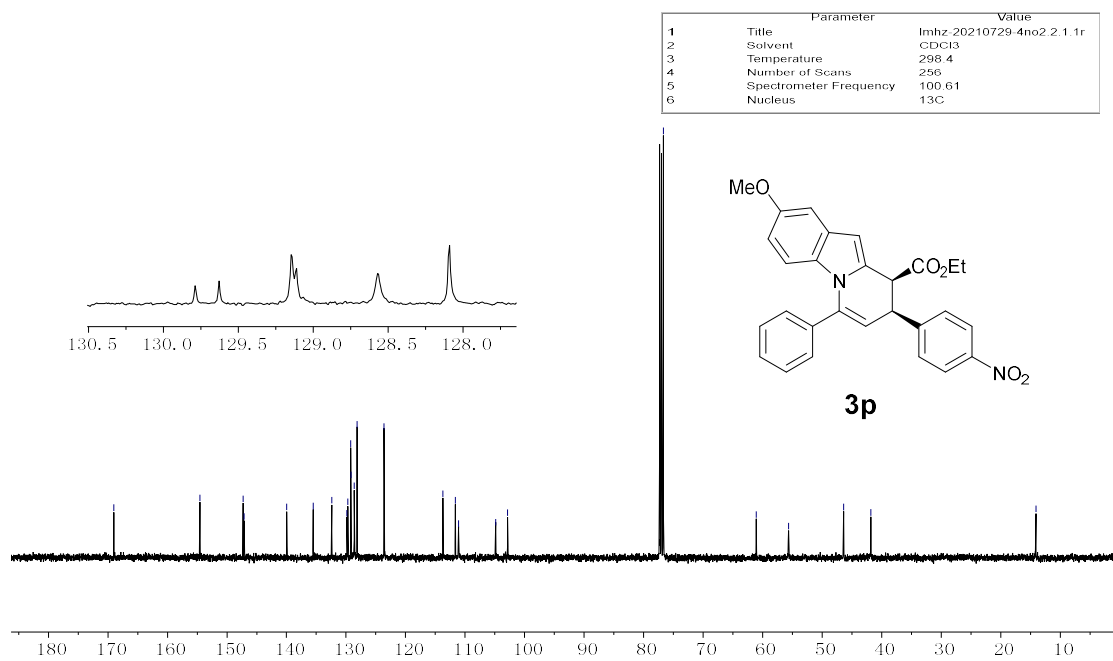



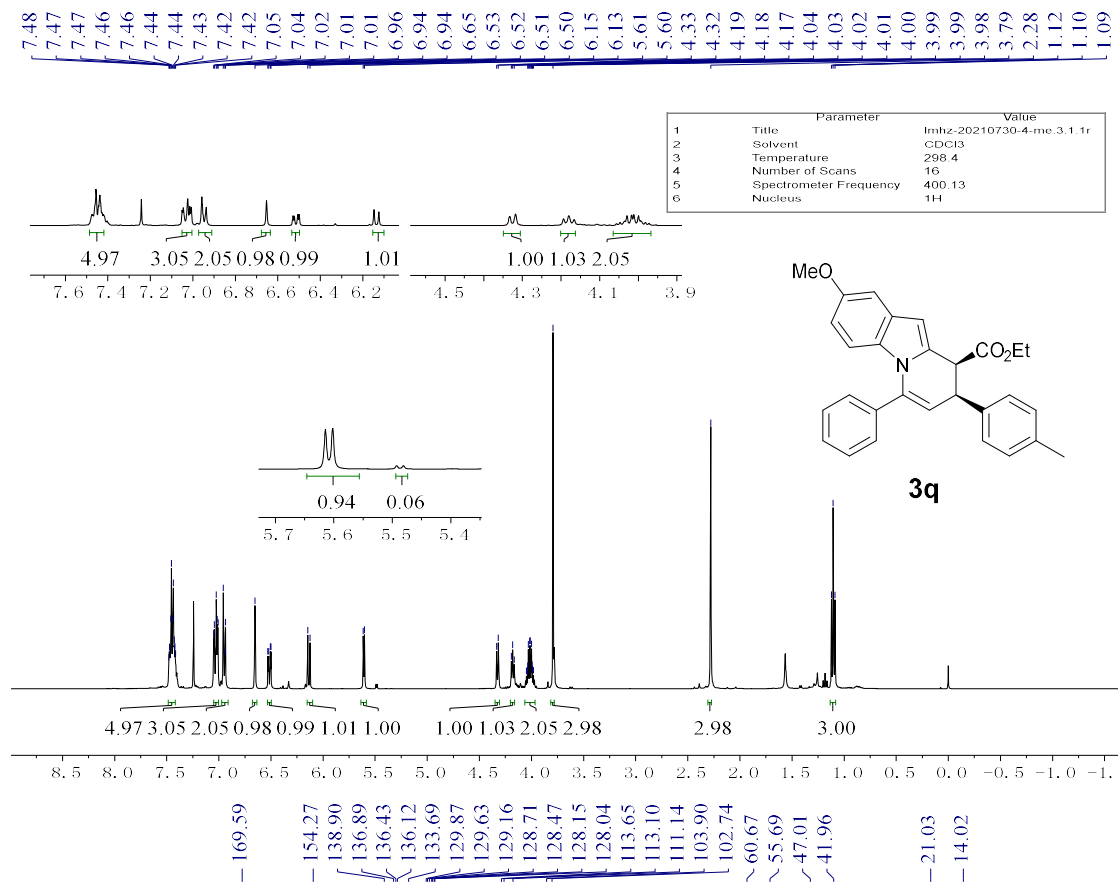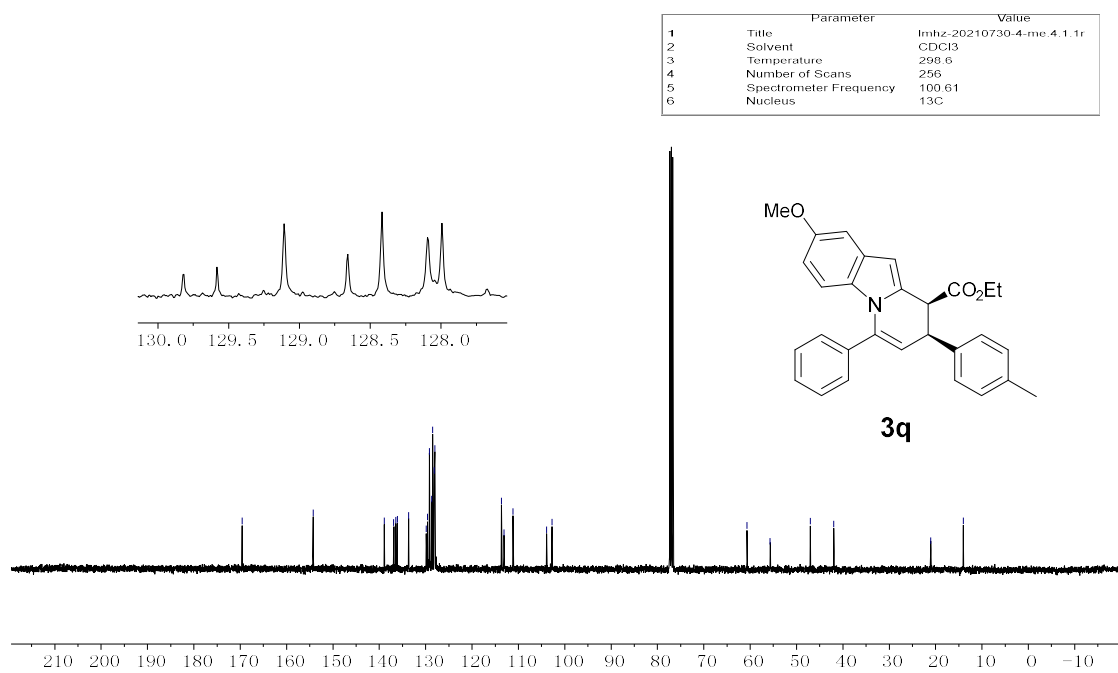

7.48  
7.47  
7.46  
7.46  
7.45  
7.44  
7.43  
7.43  
7.42  
7.42  
7.02  
7.01  
6.97  
6.97  
6.96  
6.95  
6.77  
6.76  
6.75  
6.74  
6.67  
6.53  
6.52  
6.51  
6.50  
6.15  
6.13  
5.61  
5.60  
4.33  
4.31  
4.18  
4.17  
4.15  
4.04  
4.03  
4.03  
4.02  
3.79  
3.74  
1.14  
1.12  
1.11

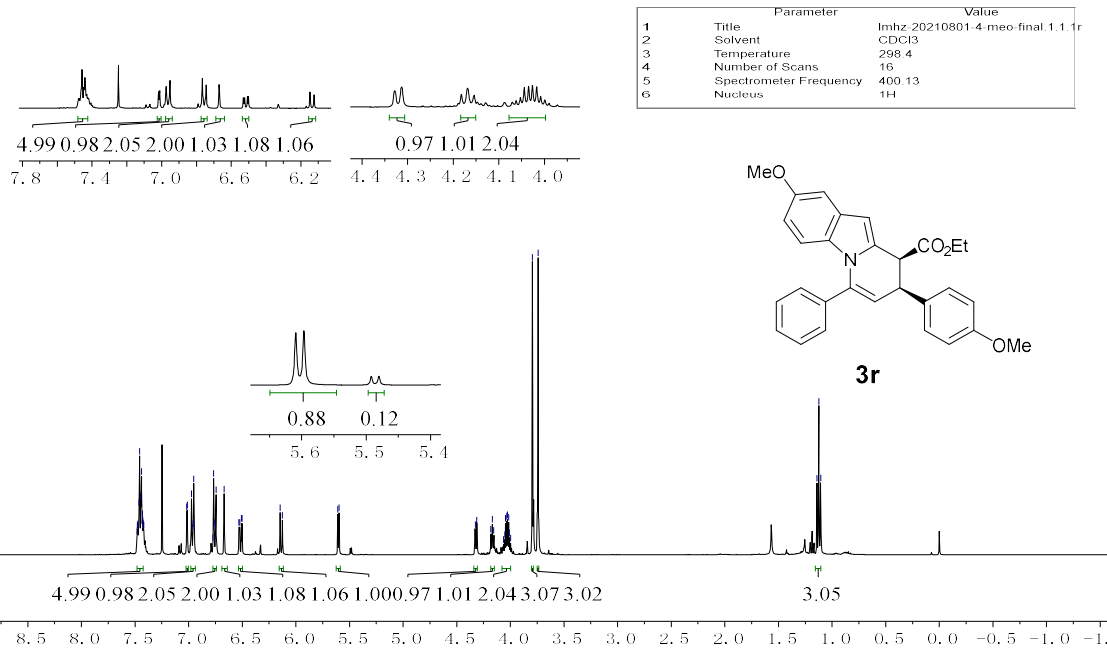

169.61  
158.77  
154.28  
138.84  
136.10  
133.63  
131.46  
129.85  
129.66  
129.23  
128.73  
128.47  
128.15  
113.84  
113.65  
113.28  
111.14  
104.02  
102.73  
60.69  
55.69  
55.17  
47.01  
41.54  
14.07

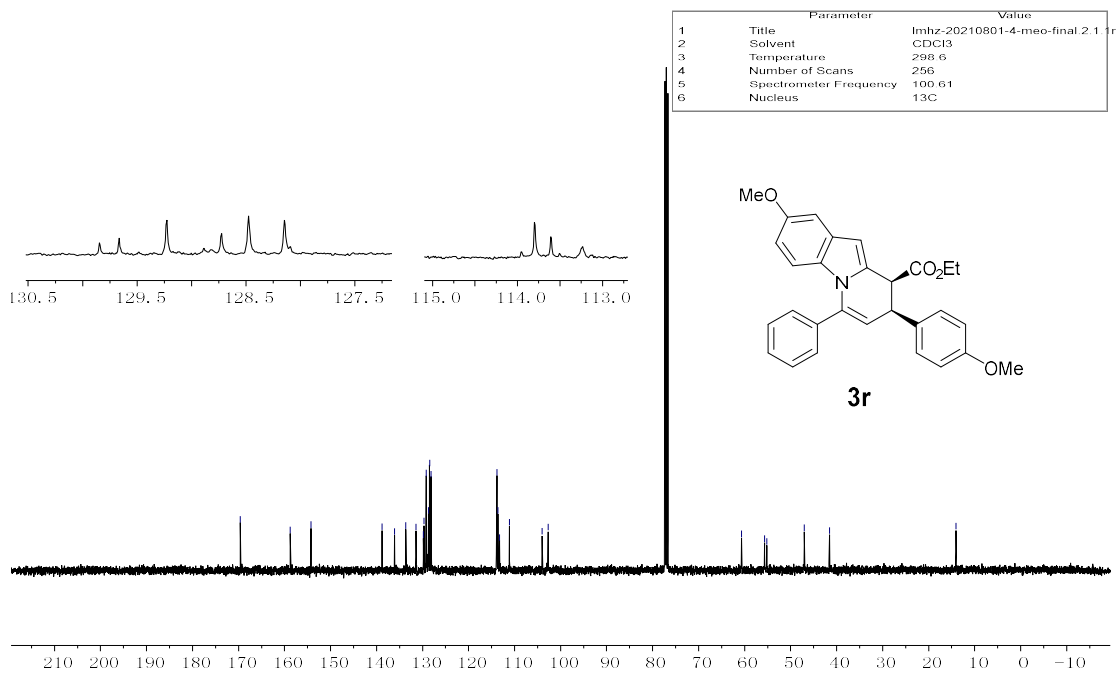

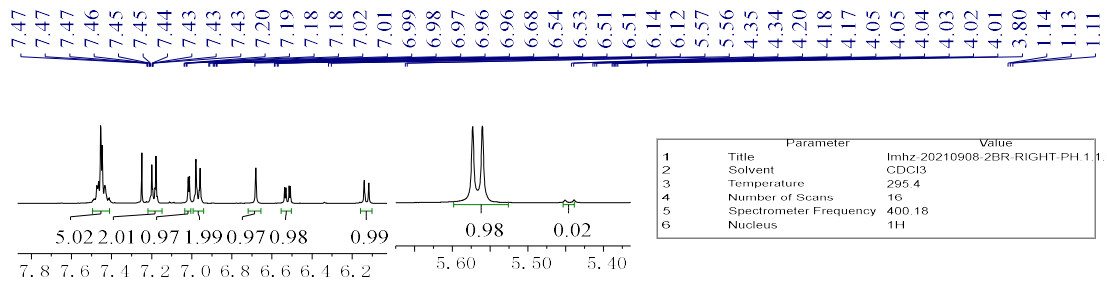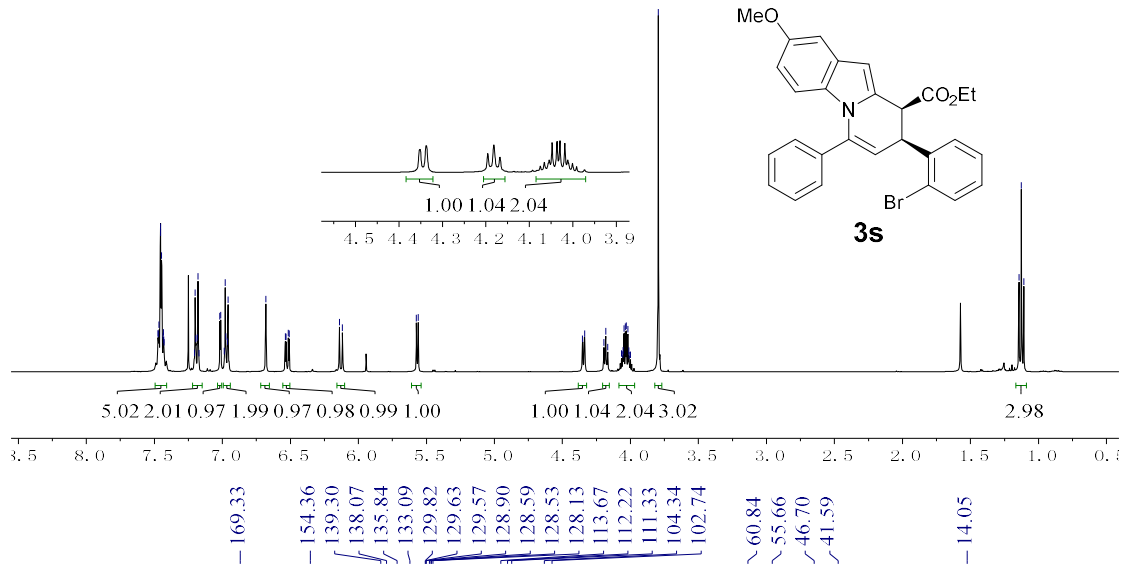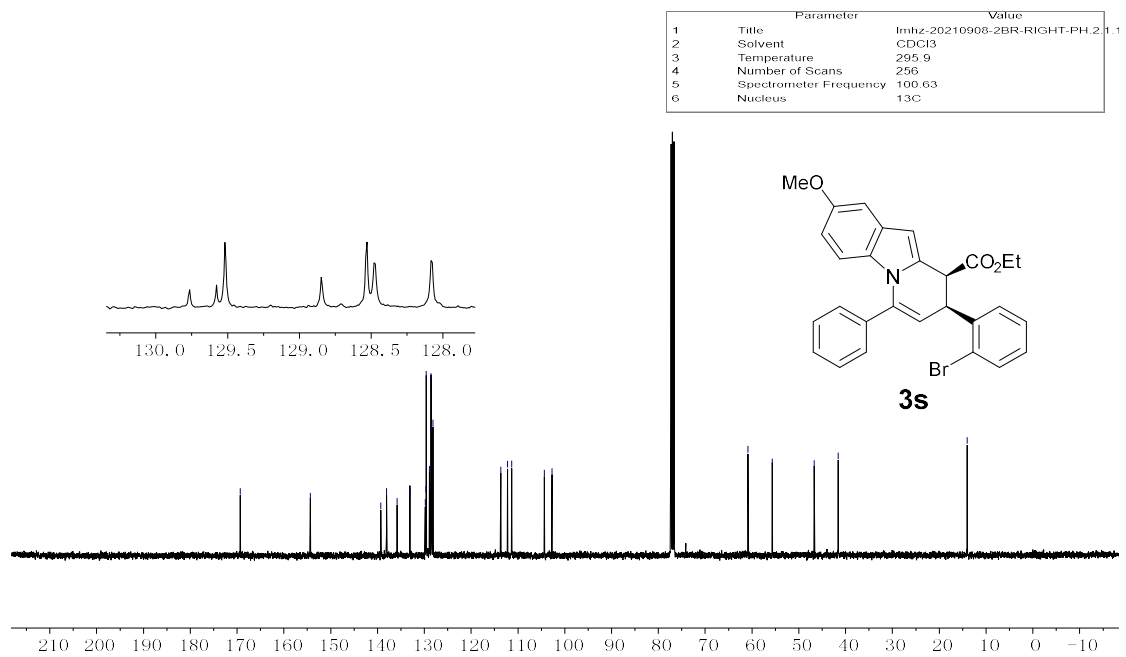

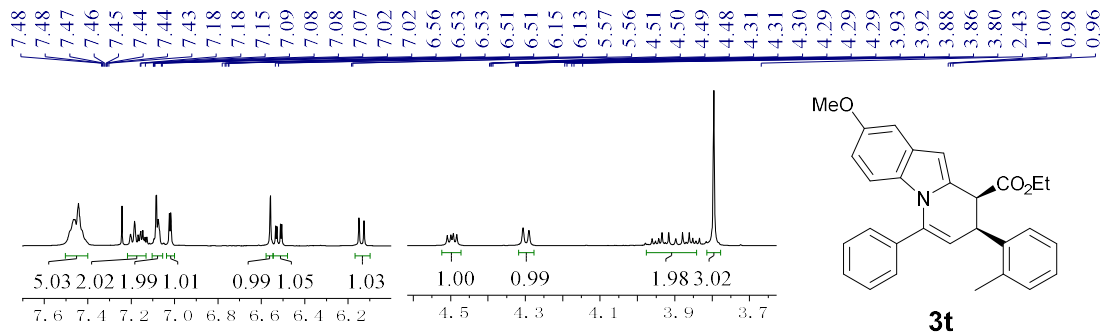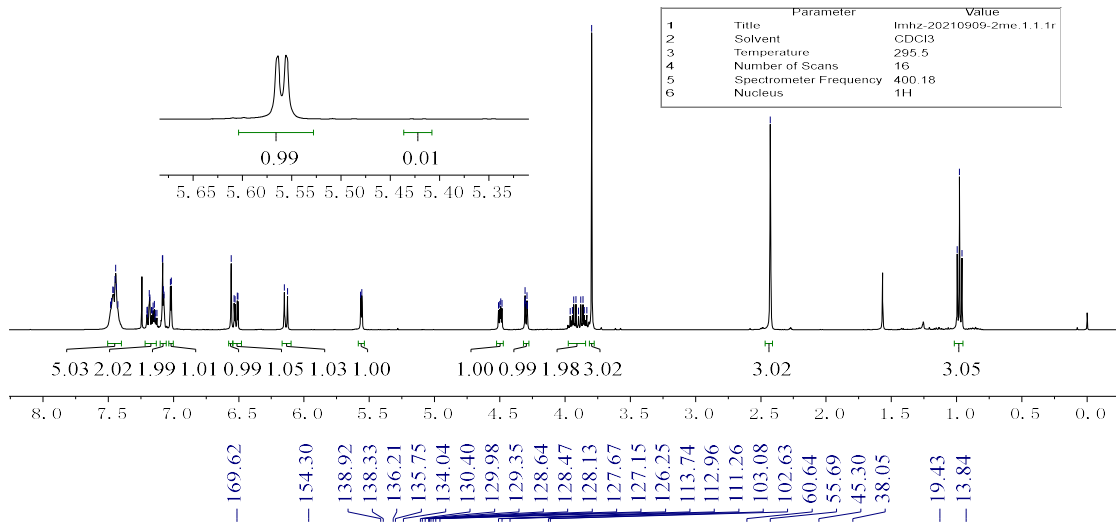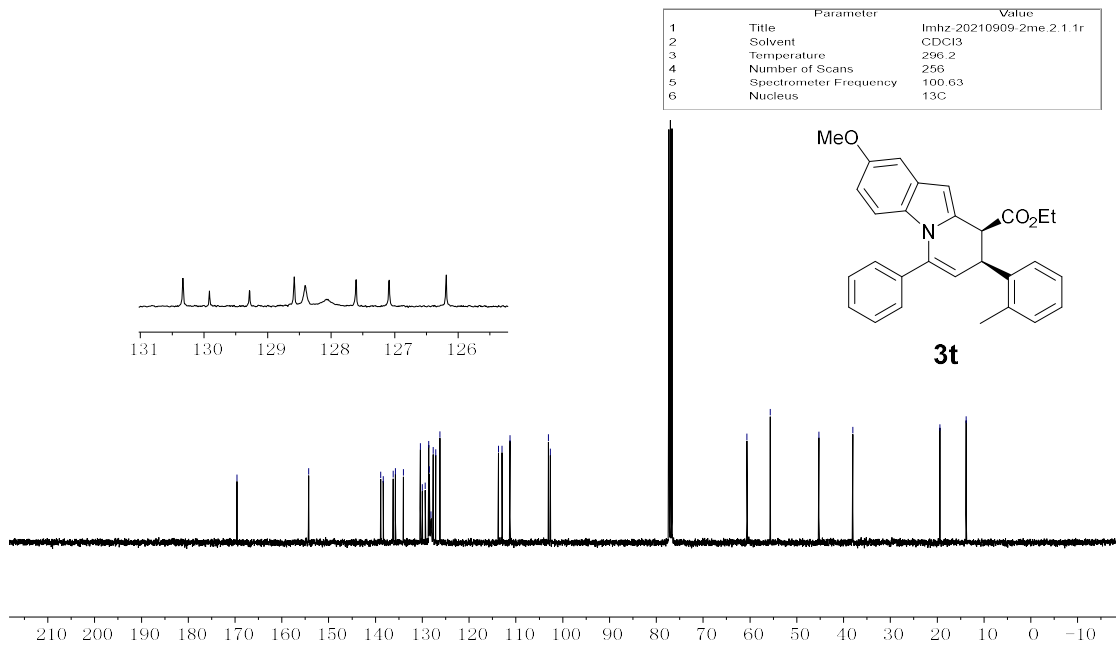

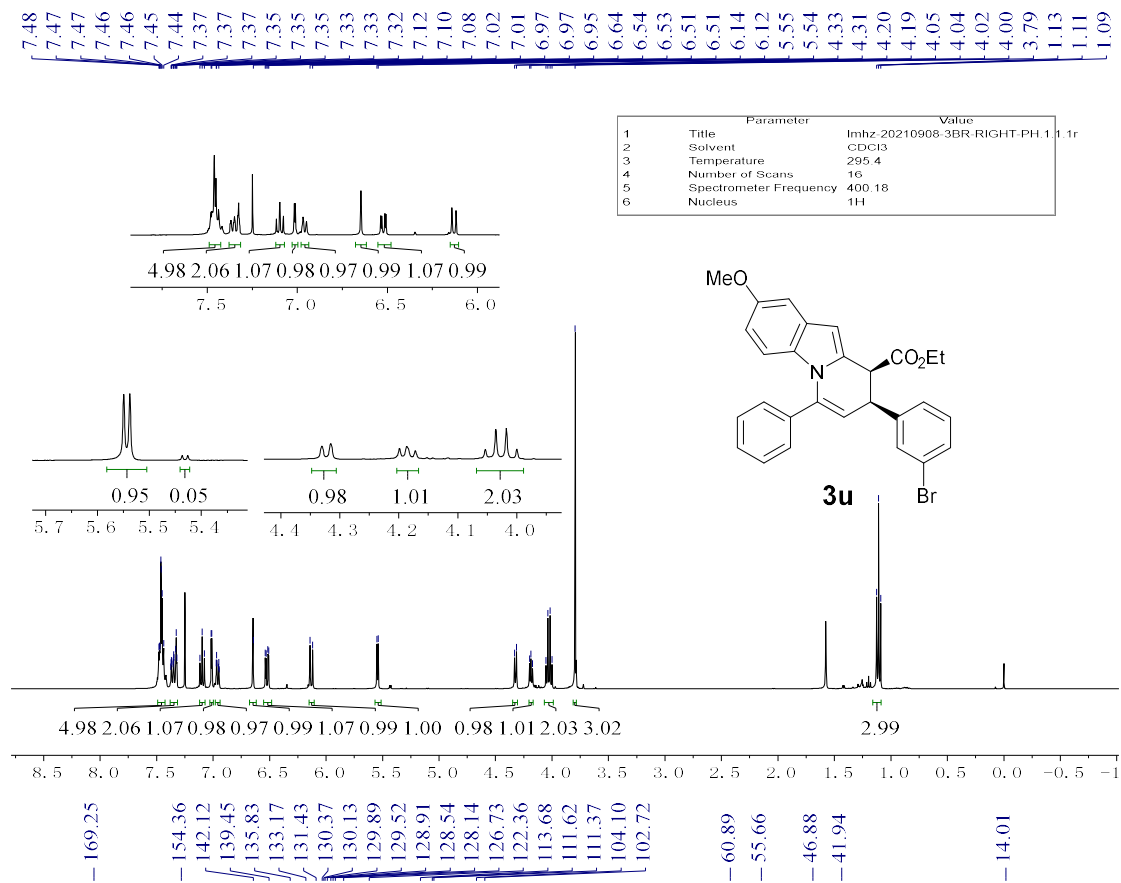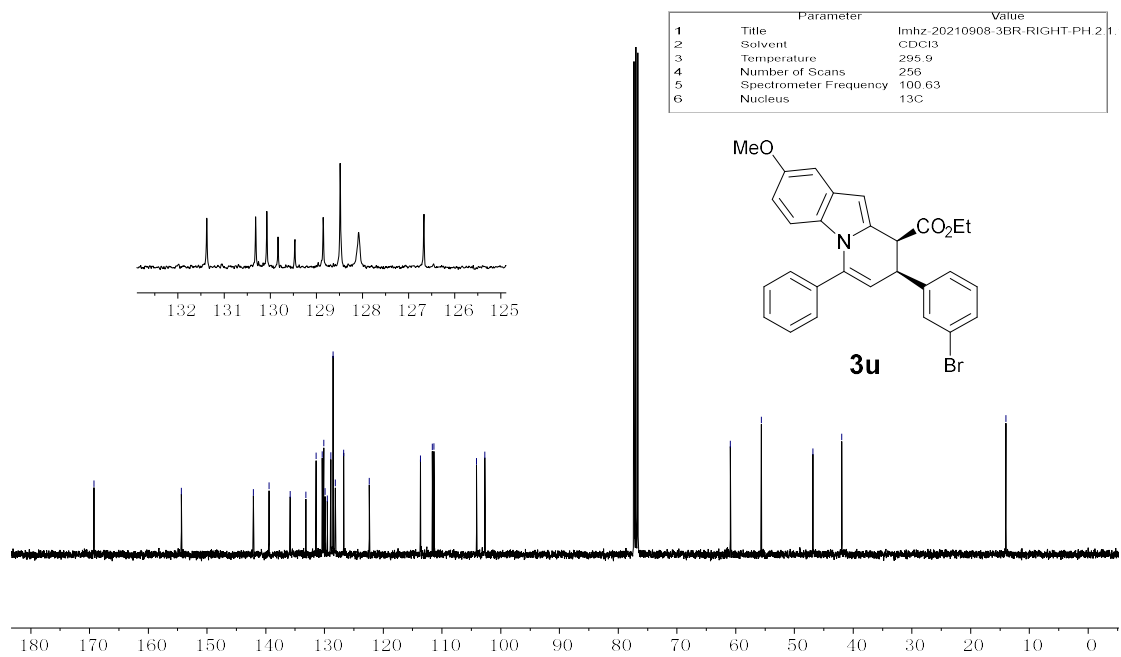

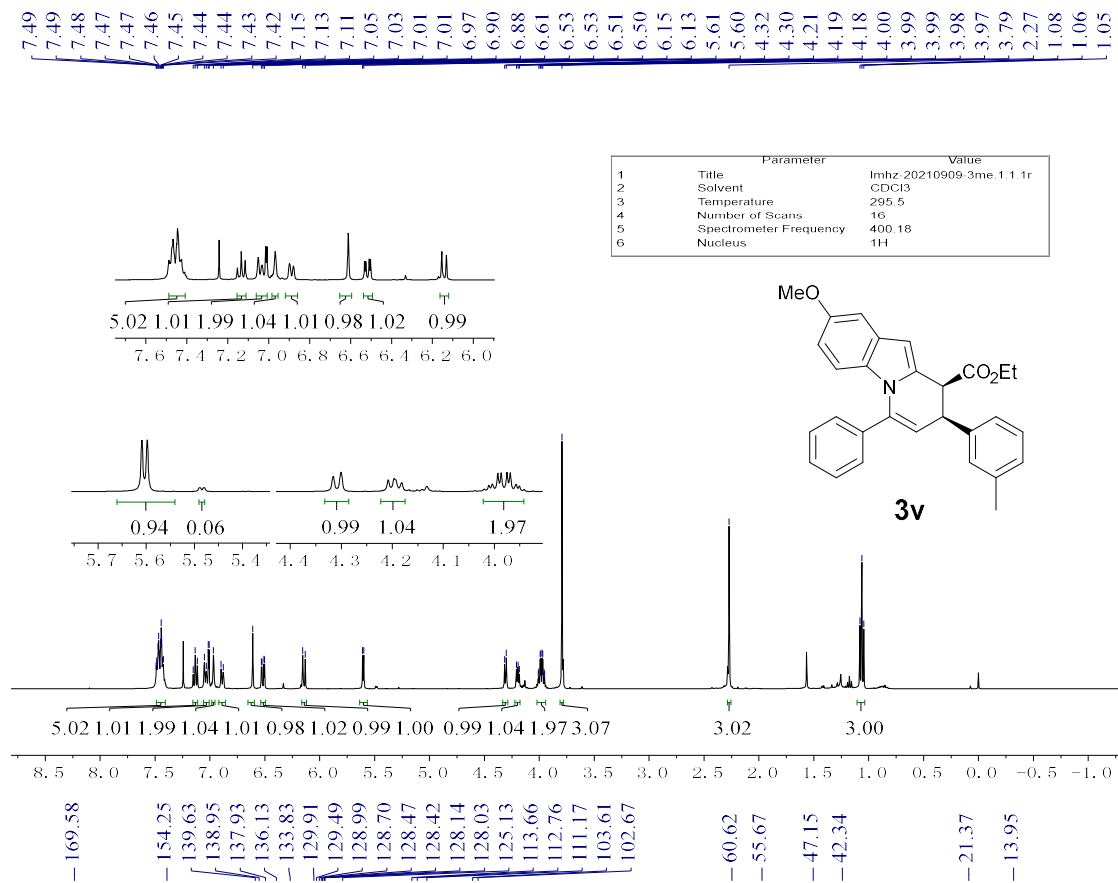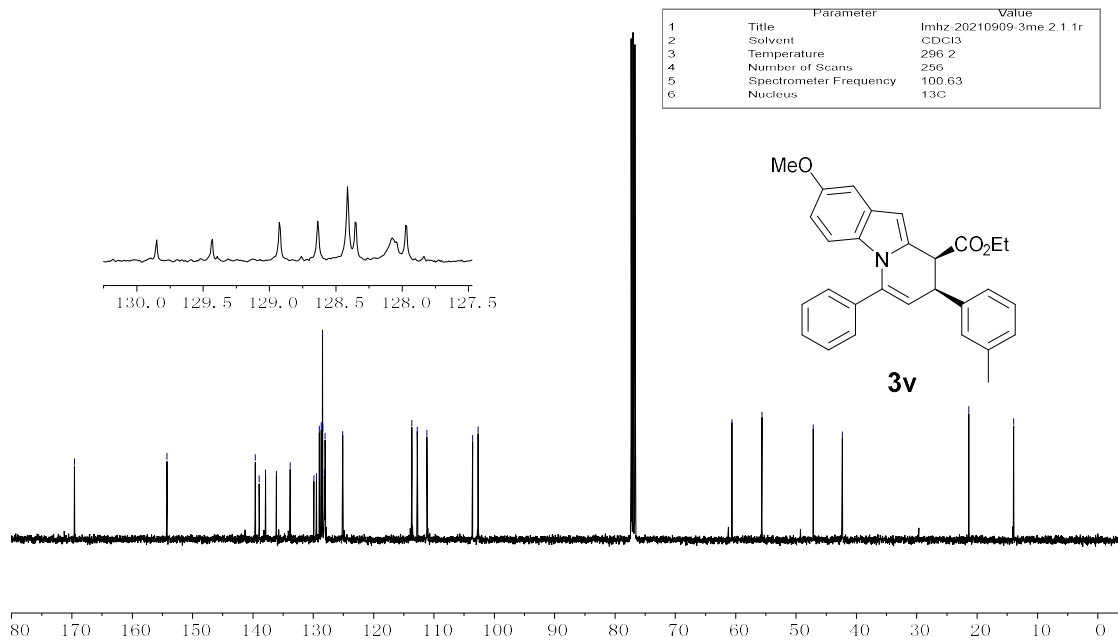

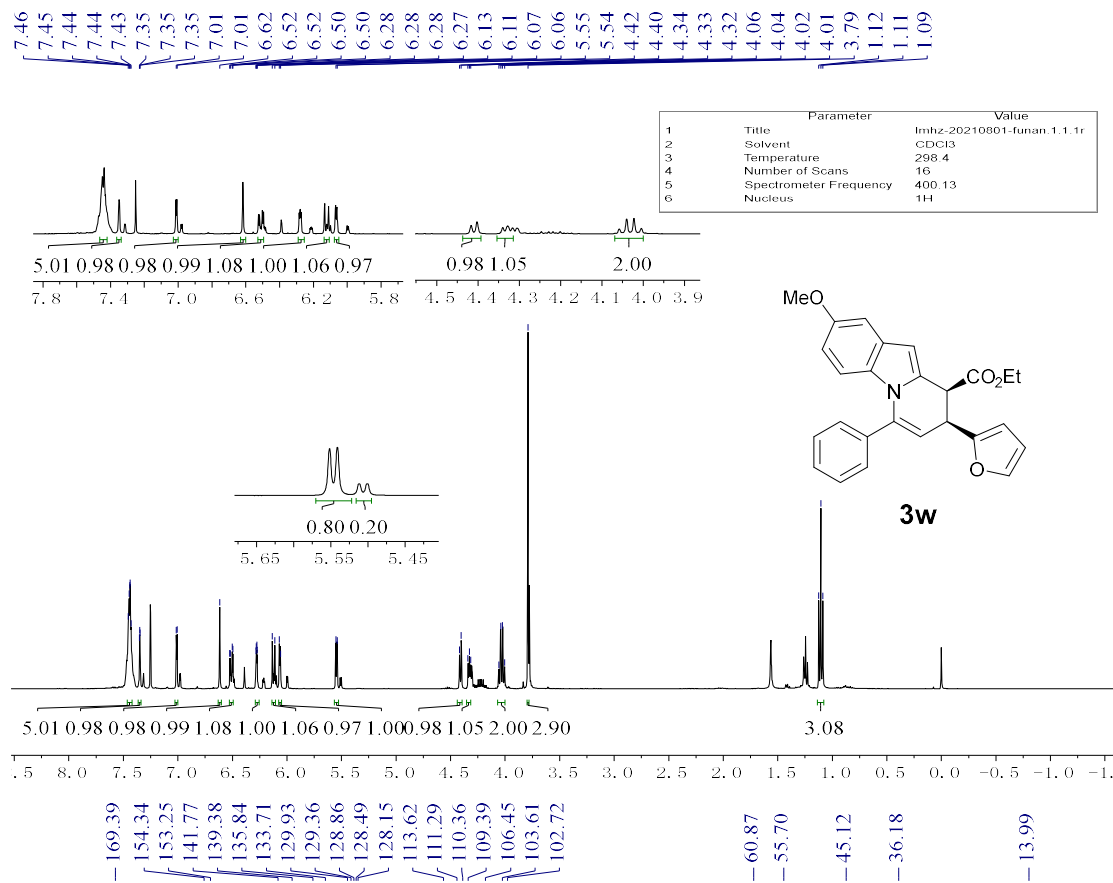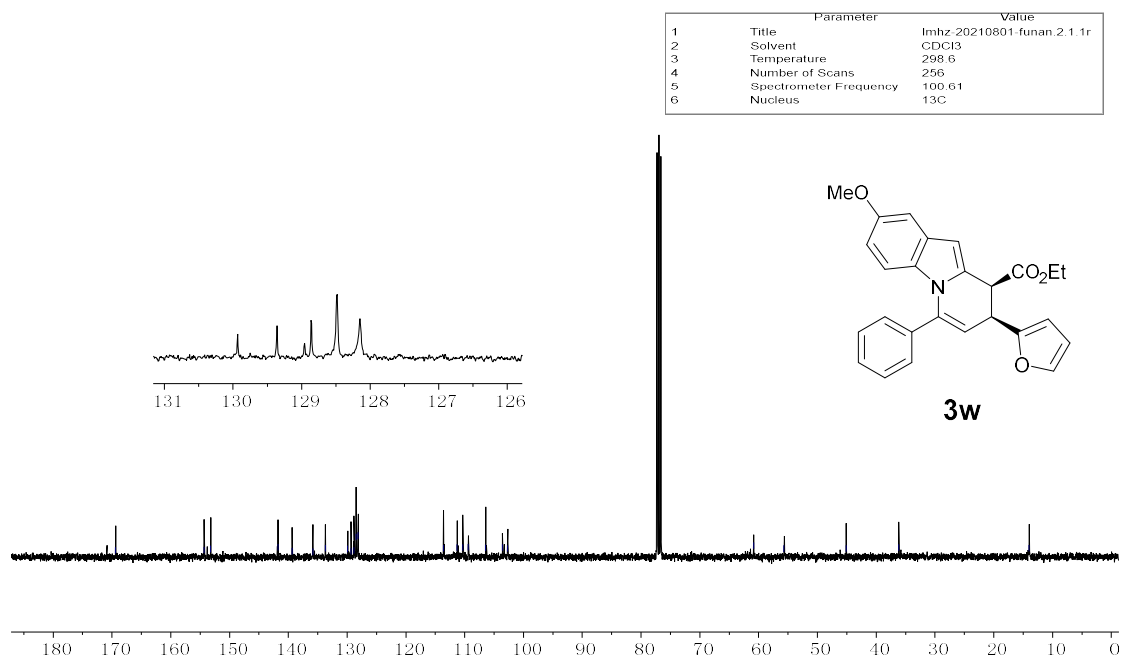

7.47  
7.47  
7.46  
7.45  
7.44  
7.44  
7.43  
7.42  
7.10  
7.09  
7.09  
7.08  
7.02  
7.02  
6.87  
6.87  
6.86  
6.86  
6.85  
6.85  
6.78  
6.75  
6.74  
6.53  
6.52  
6.51  
6.50  
6.13  
6.11  
5.68  
5.67  
4.53  
4.51  
4.50  
4.38  
4.37  
4.14  
4.13  
4.11  
4.09  
3.79  
1.21  
1.19  
1.17

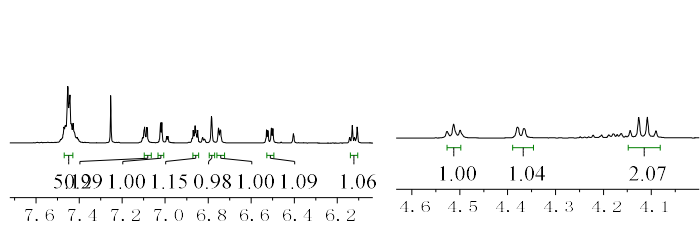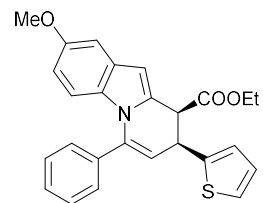

**3x**

| Parameter                | Value                       |
|--------------------------|-----------------------------|
| 1 Title                  | Imhz 20210801-saifen.1.1.1r |
| 2 Solvent                | CDCl3                       |
| 3 Temperature            | 298.4                       |
| 4 Number of Scans        | 16                          |
| 5 Spectrometer Frequency | 400.13                      |
| 6 Nucleus                | 1H                          |

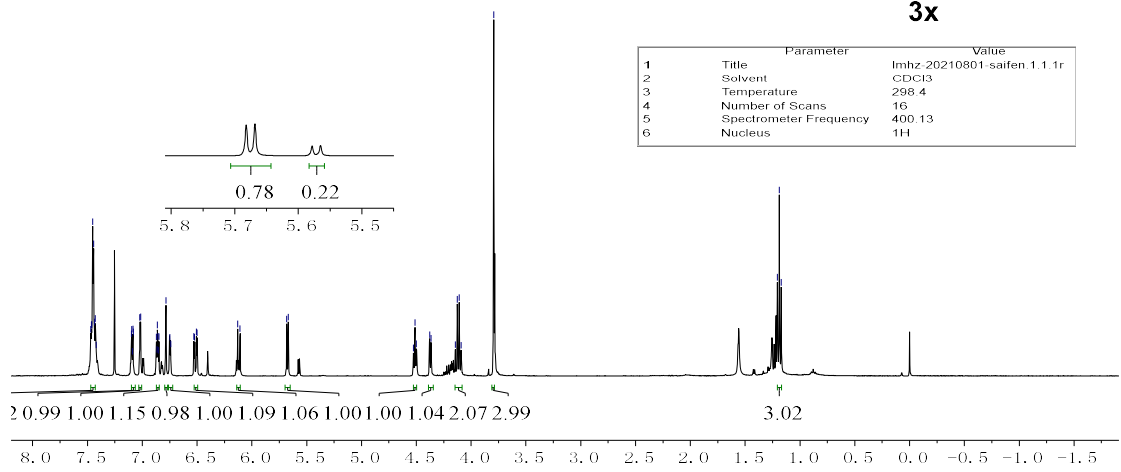

169.19  
154.34  
142.07  
138.88  
135.75  
132.97  
129.83  
129.69  
128.91  
128.51  
128.20  
126.64  
125.45  
124.48  
113.63  
112.93  
111.30  
104.81  
102.73

60.94  
55.64  
47.14  
37.30  
14.06

| Parameter                | Value                       |
|--------------------------|-----------------------------|
| 1 Title                  | Imhz 20210801-saifen.2.1.1r |
| 2 Solvent                | CDCl3                       |
| 3 Temperature            | 298.6                       |
| 4 Number of Scans        | 256                         |
| 5 Spectrometer Frequency | 100.61                      |
| 6 Nucleus                | 13C                         |

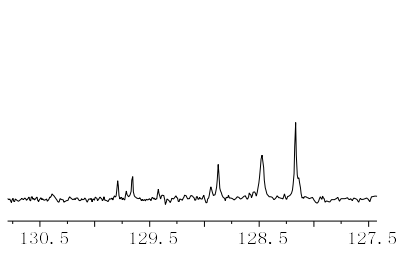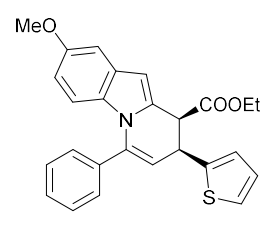

**3x**

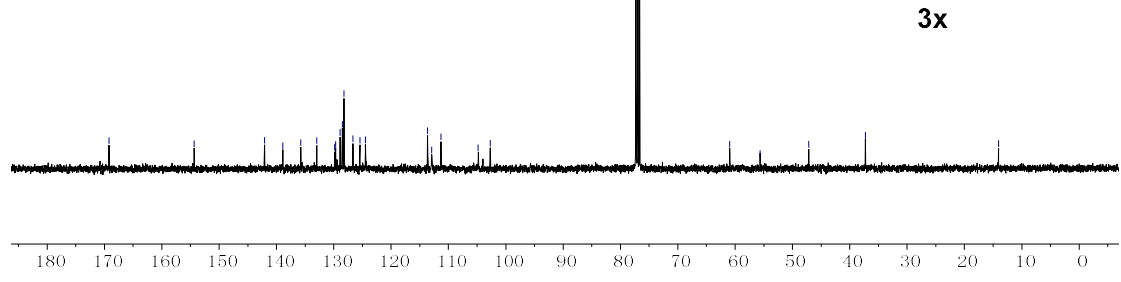



7.46  
7.45  
7.45  
7.44  
7.43  
7.43  
7.01  
7.01  
6.68  
6.68  
6.67  
6.66  
6.66  
6.65  
6.58  
6.57  
6.53  
6.52  
6.51  
6.50  
6.50  
6.13  
6.11  
6.11  
5.89  
5.89  
5.88  
5.88  
5.57  
5.55  
5.55  
4.31  
4.30  
4.15  
4.14  
4.12  
4.08  
4.07  
4.07  
4.05  
4.05  
3.79  
1.17  
1.15  
1.14

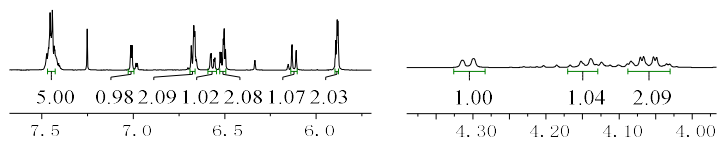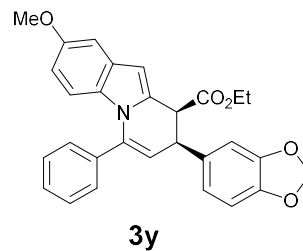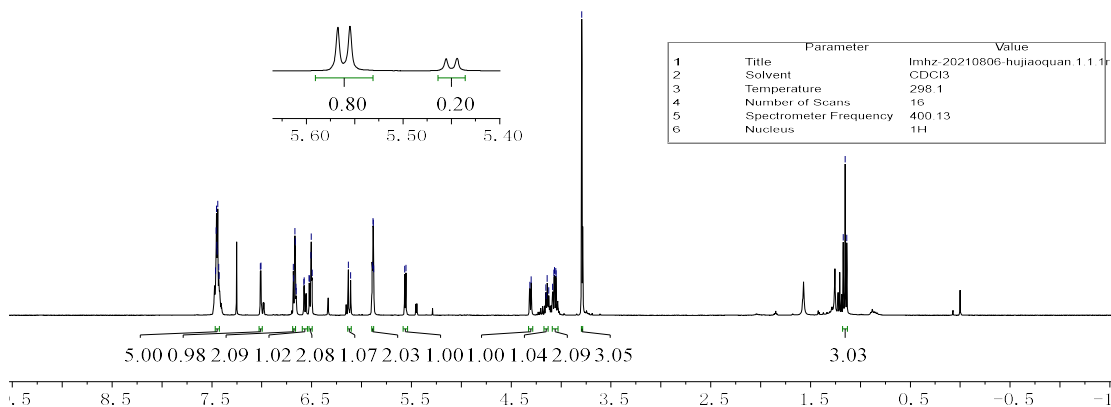

| Parameter                | Value                          |
|--------------------------|--------------------------------|
| 1 Title                  | Imhz-20210806-hujiaoquan 1.1 1 |
| 2 Solvent                | CDCl3                          |
| 3 Temperature            | 298.1                          |
| 4 Number of Scans        | 16                             |
| 5 Spectrometer Frequency | 400.13                         |
| 6 Nucleus                | 1H                             |

169.55  
154.31  
147.63  
146.73  
138.96  
136.00  
133.41  
133.28  
129.83  
129.64  
128.78  
128.48  
128.15  
121.43  
113.66  
112.87  
111.23  
108.58  
108.14  
104.09  
102.75  
100.92

60.76  
55.66  
47.06  
42.03  
14.11

| Parameter                | Value                          |
|--------------------------|--------------------------------|
| 1 Title                  | Imhz-20210806-hujiaoquan 2.1 1 |
| 2 Solvent                | CDCl3                          |
| 3 Temperature            | 298.3                          |
| 4 Number of Scans        | 256                            |
| 5 Spectrometer Frequency | 100.61                         |
| 6 Nucleus                | 13C                            |

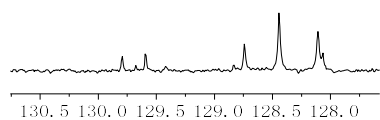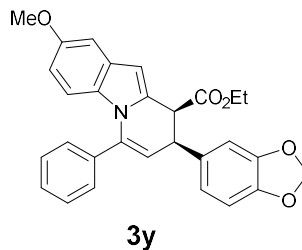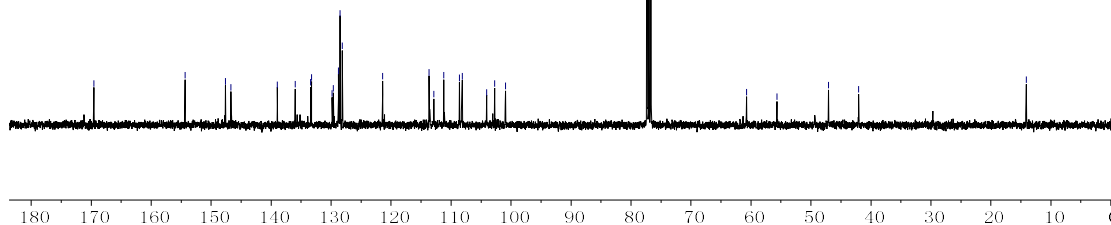

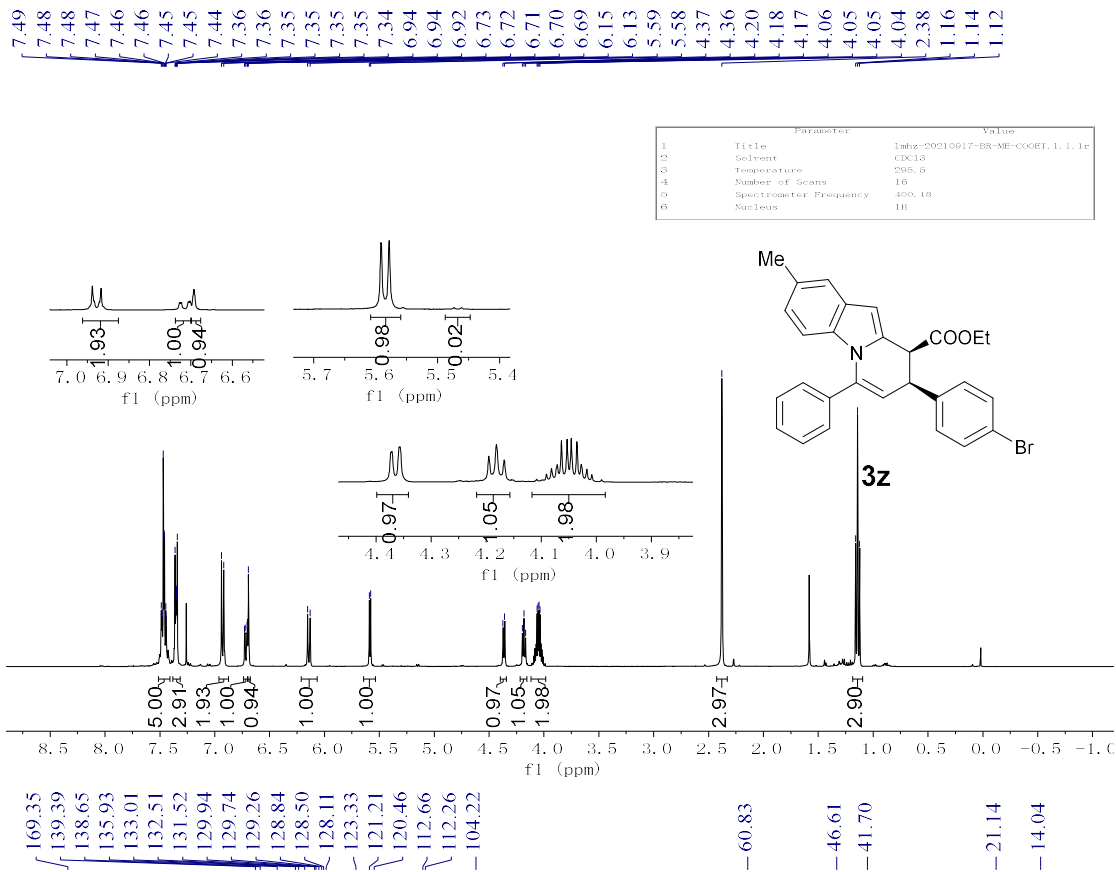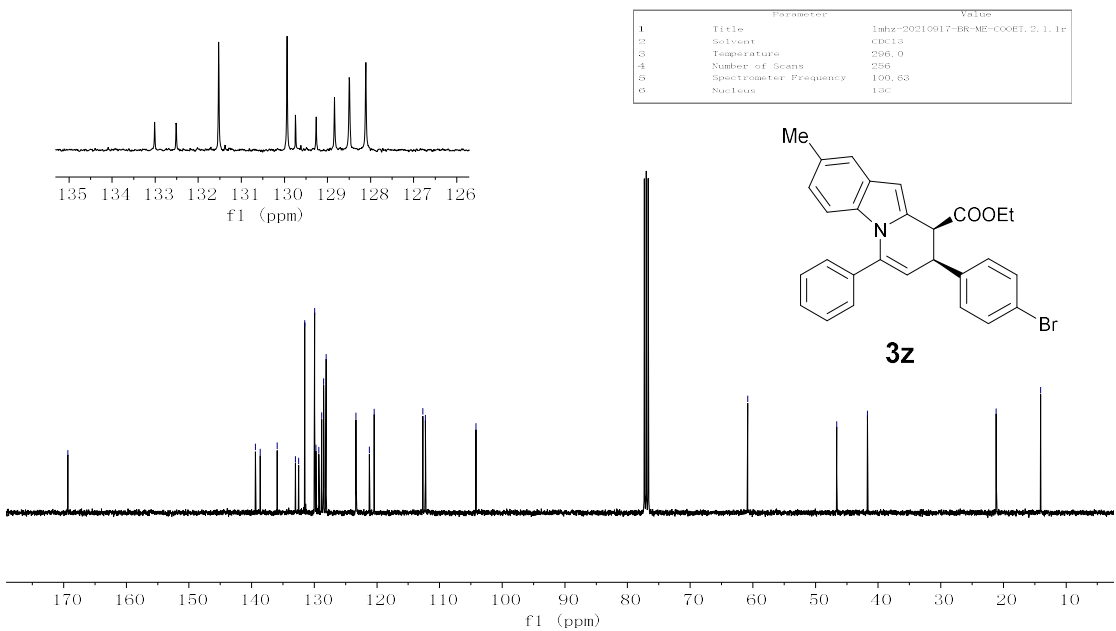

GCOSY:

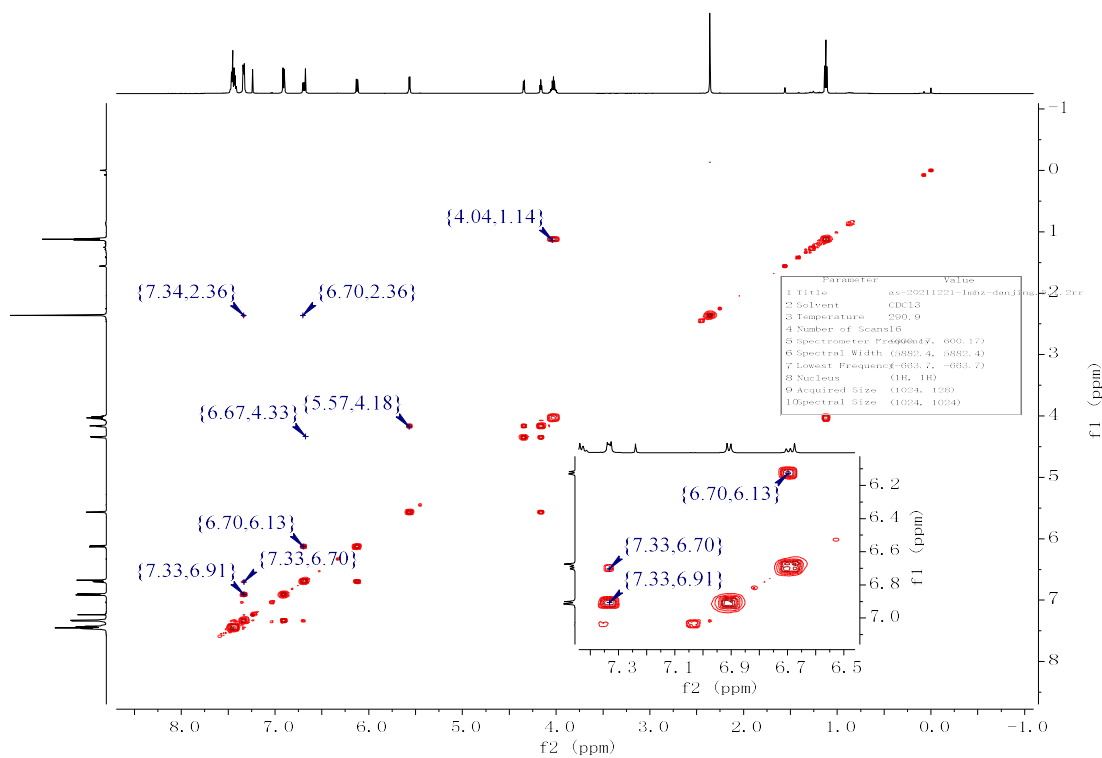

NOESY:

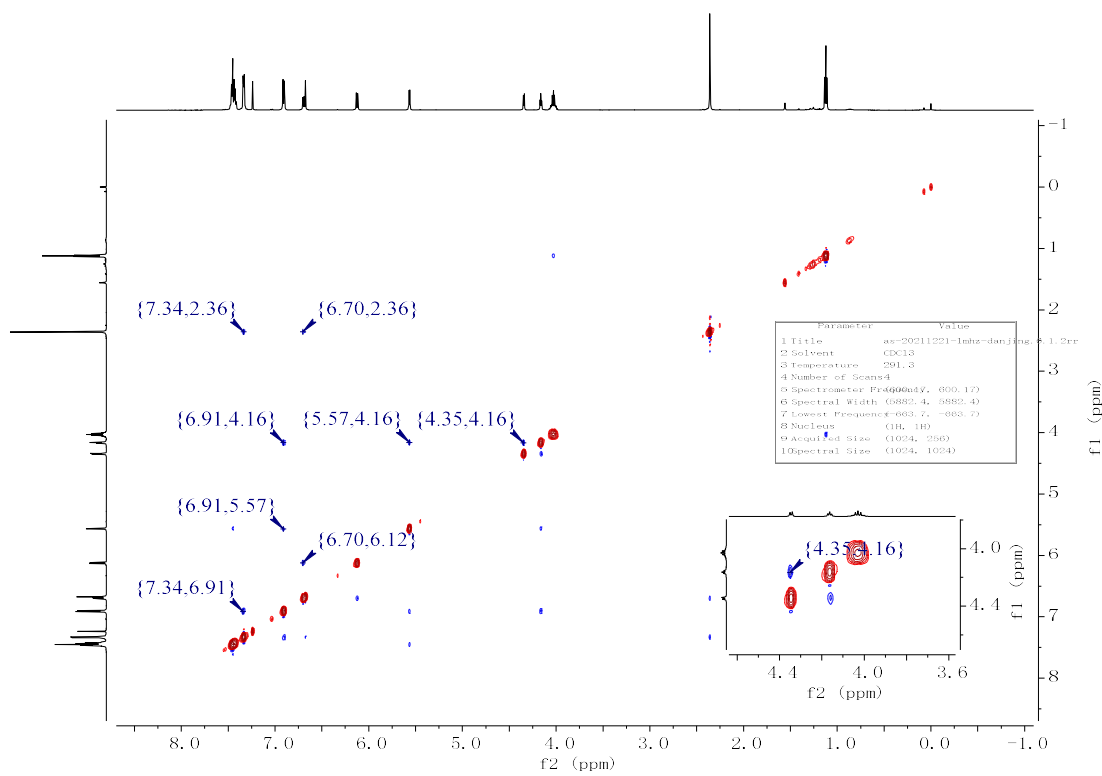

GHSQC

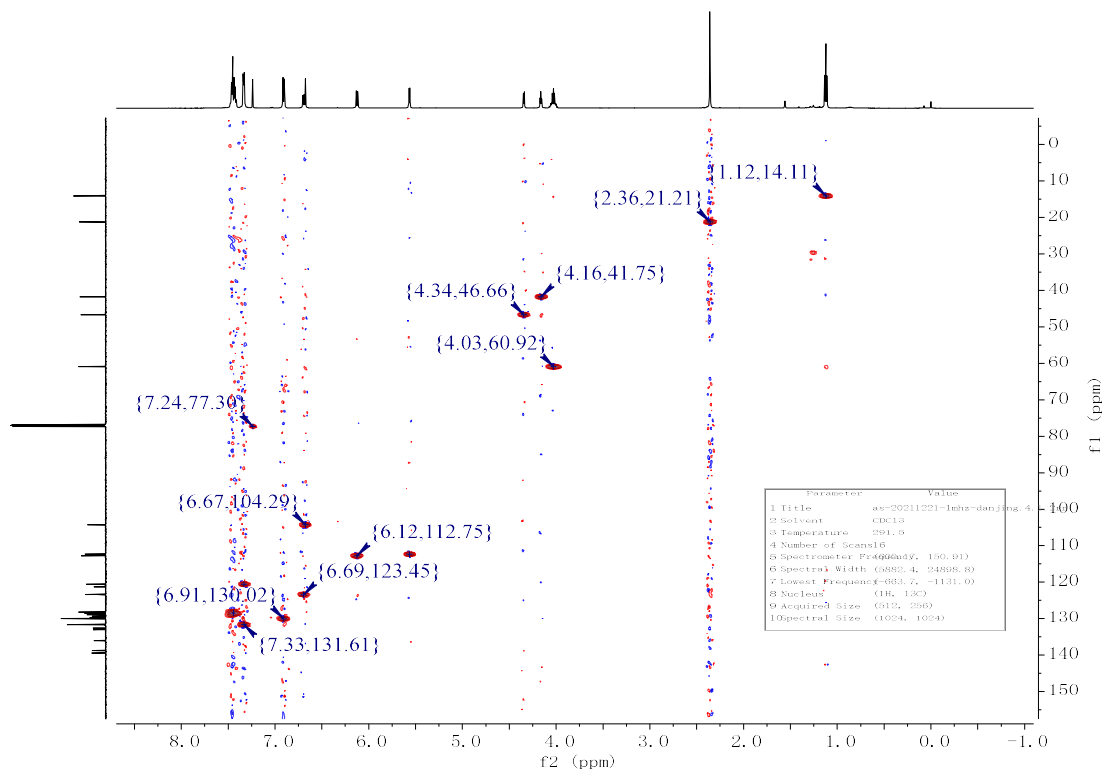

GHMBC

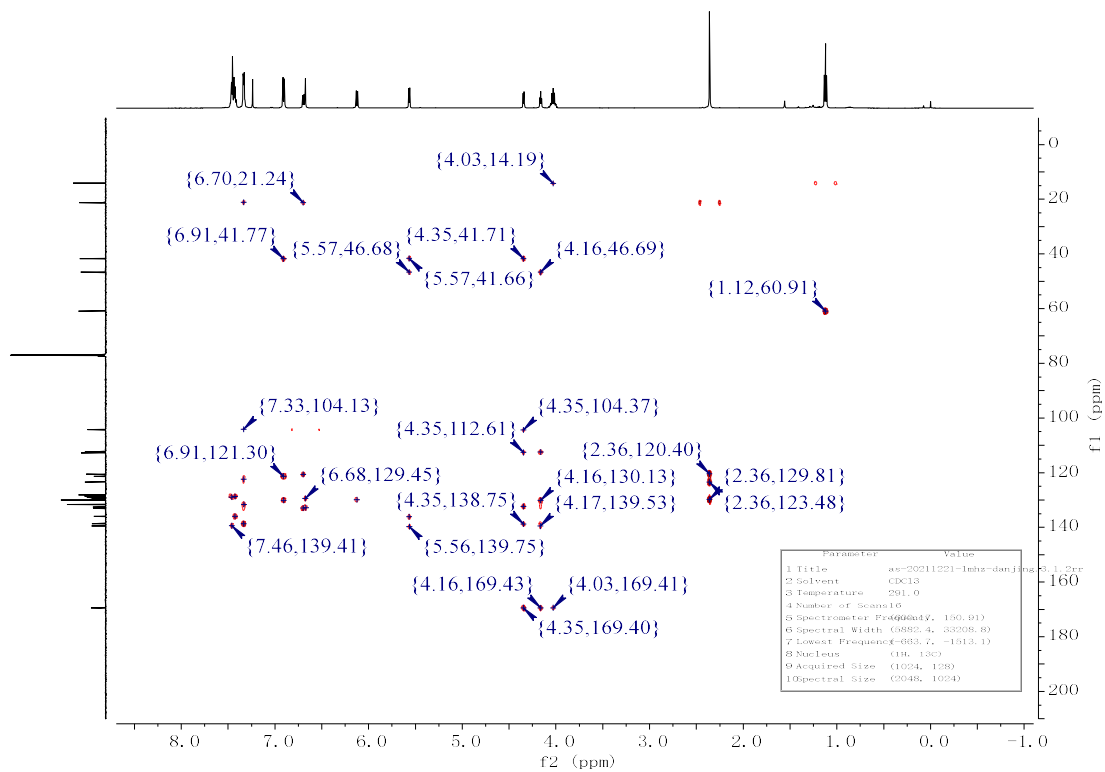

GHMBC(Partial magnification)

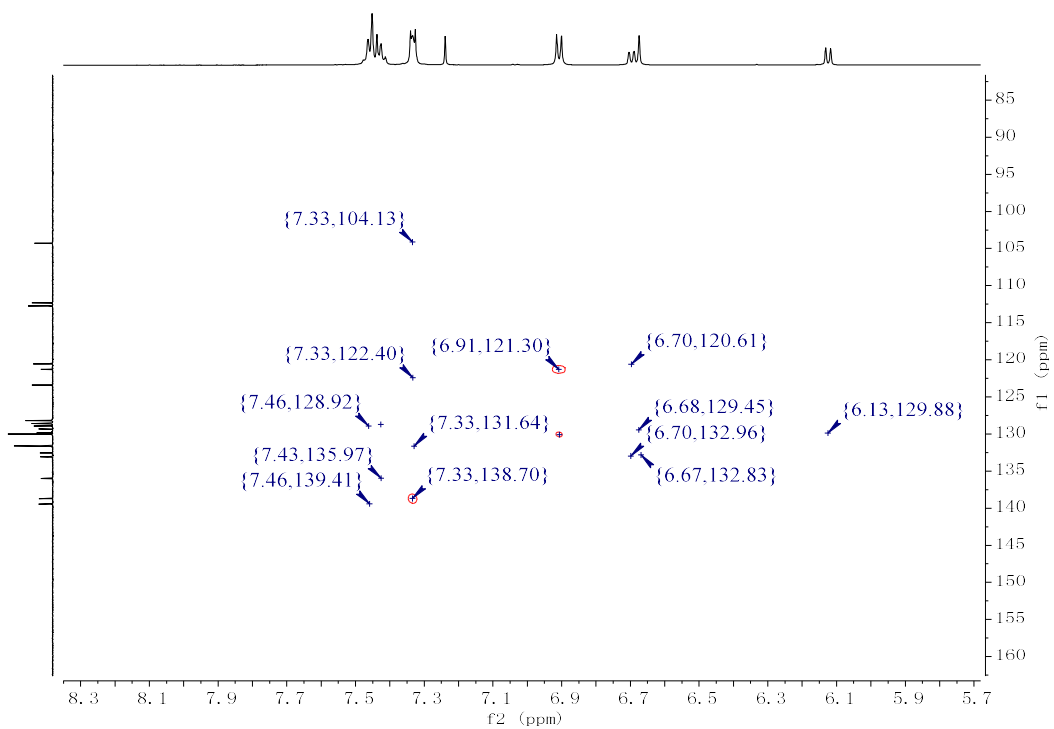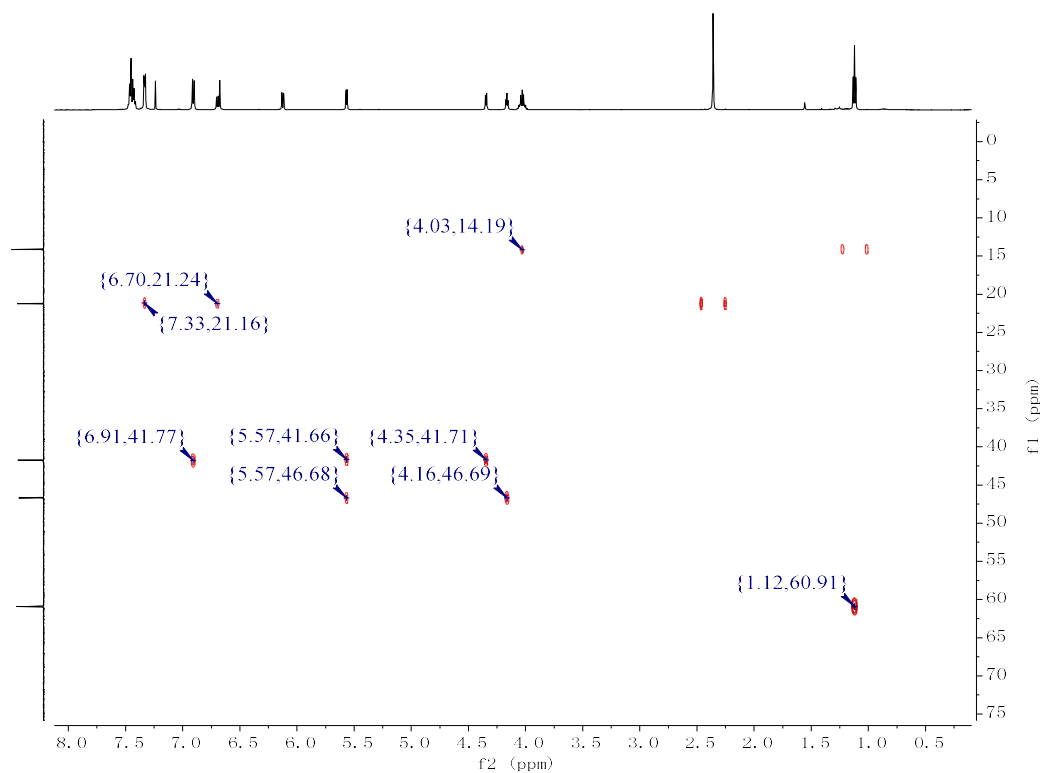

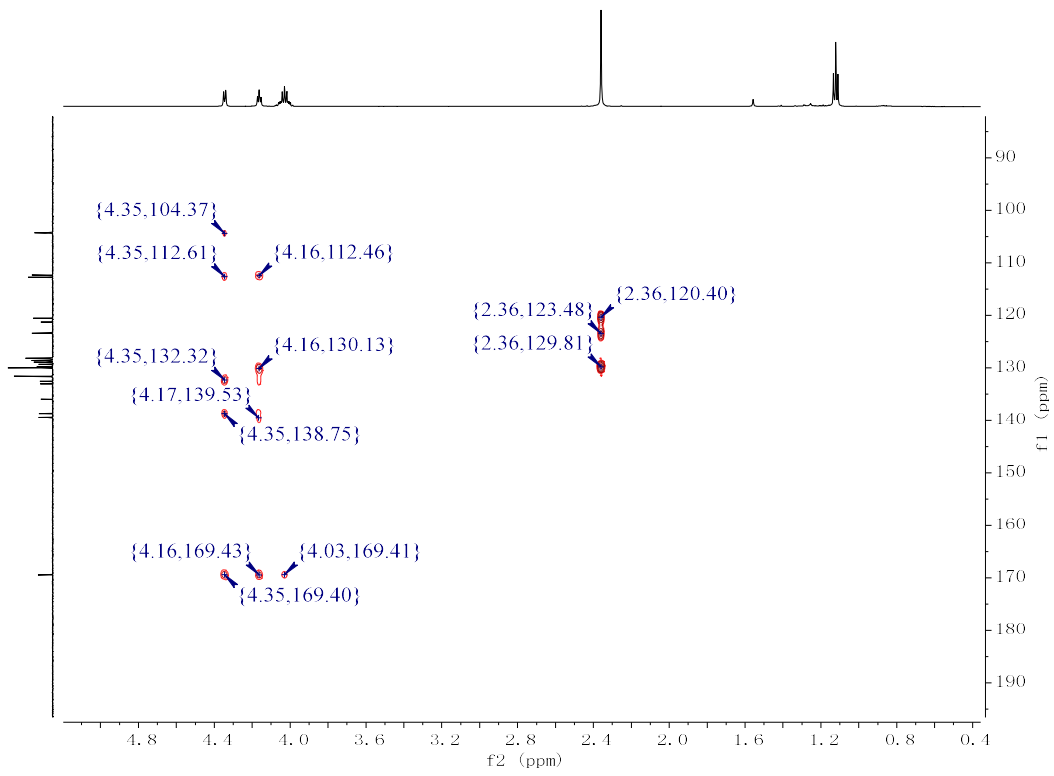

7.49  
7.47  
7.47  
7.46  
7.44  
7.21  
7.20  
7.19  
7.01  
7.00  
6.95  
6.94  
6.94  
6.93  
6.92  
6.55  
6.55  
6.54  
6.53  
6.52  
6.34  
6.20  
6.18  
5.72  
5.71  
4.04  
4.03  
4.03  
4.01  
4.00  
3.99  
3.98  
3.96  
3.81  
3.63  
3.61  
3.60  
3.58  
3.57  
3.54  
3.52  
1.55

| Parameter                | Value                          |
|--------------------------|--------------------------------|
| 1 Title                  | 1mhz-20211028-1ia1h4-20.1.1.1r |
| 2 Solvent                | CDCl3                          |
| 3 Temperature            | 295.2                          |
| 4 Number of Scans        | 16                             |
| 5 Spectrometer Frequency | 400.18                         |
| 6 Nucleus                | 1H                             |

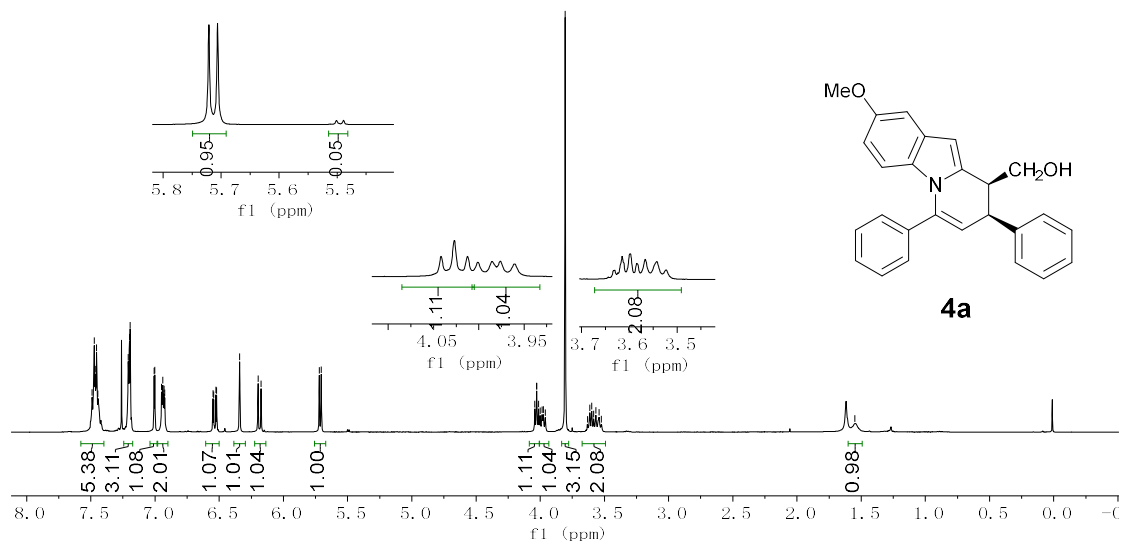

154.23  
139.24  
138.95  
137.33  
136.01  
129.89  
129.85  
128.78  
128.54  
128.46  
128.09  
127.00  
114.48  
113.58  
110.72  
102.51  
101.94

61.19  
55.66  
42.12  
40.48

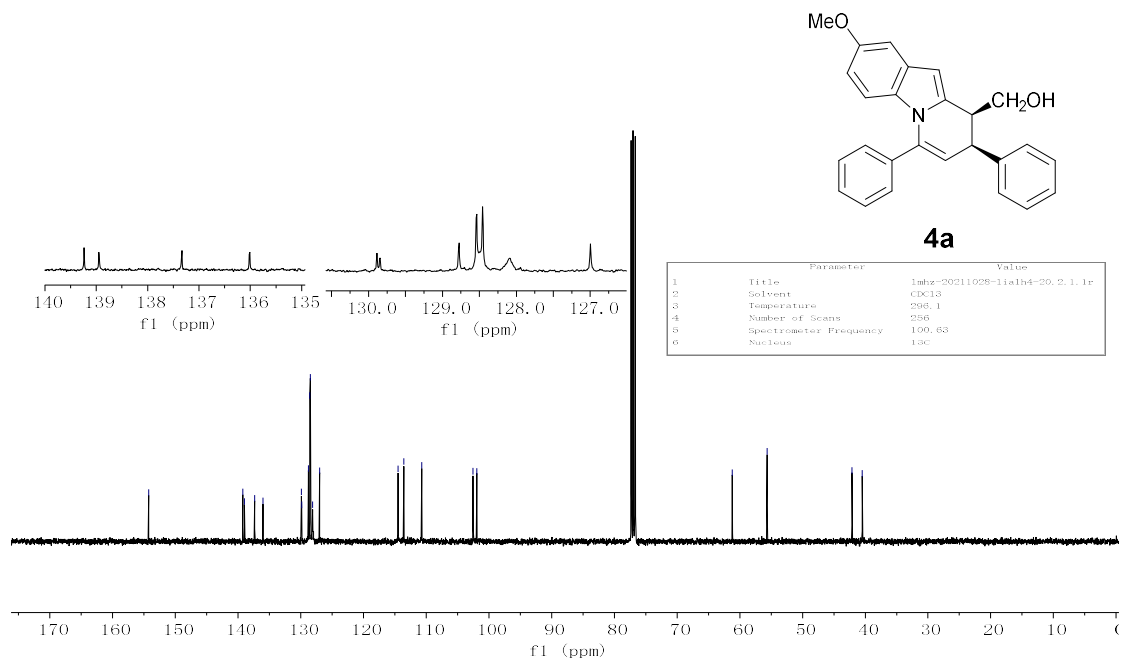

| Parameter                | Value                          |
|--------------------------|--------------------------------|
| 1 Title                  | 1mhz-20211028-1ia1h4-20.2.1.1r |
| 2 Solvent                | CDCl3                          |
| 3 Temperature            | 296.1                          |
| 4 Number of Scans        | 236                            |
| 5 Spectrometer Frequency | 100.63                         |
| 6 Nucleus                | 13C                            |

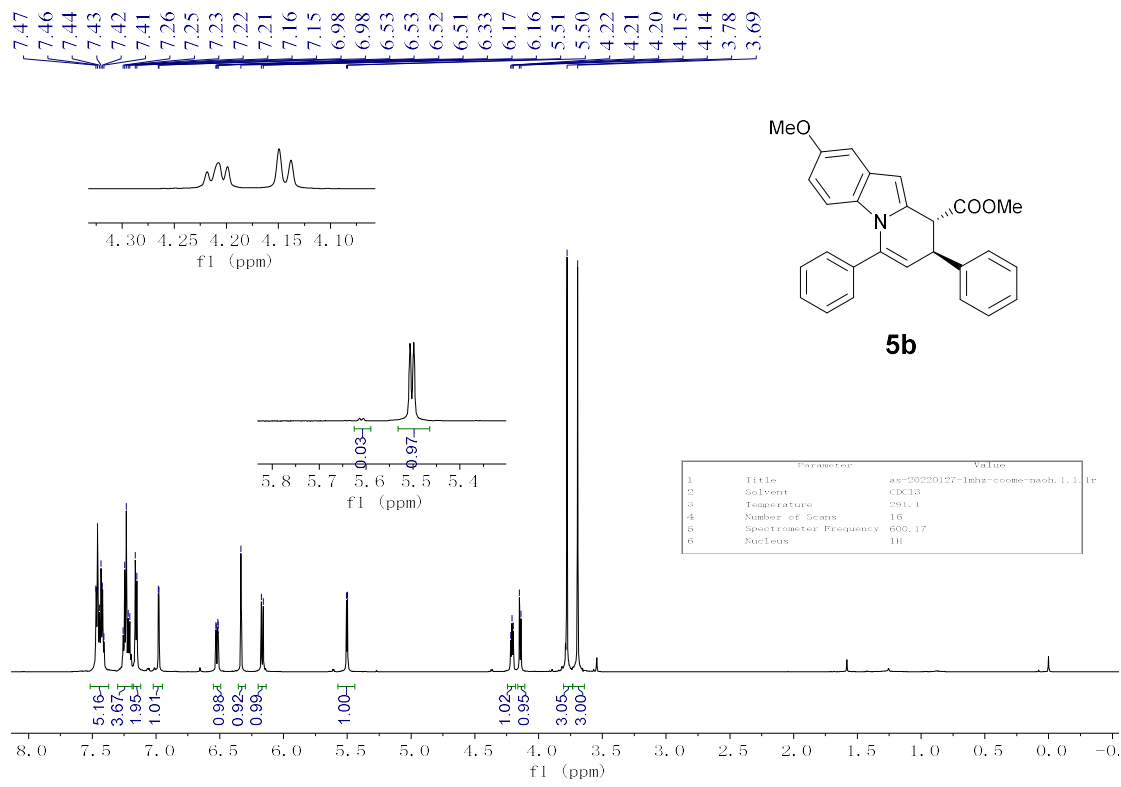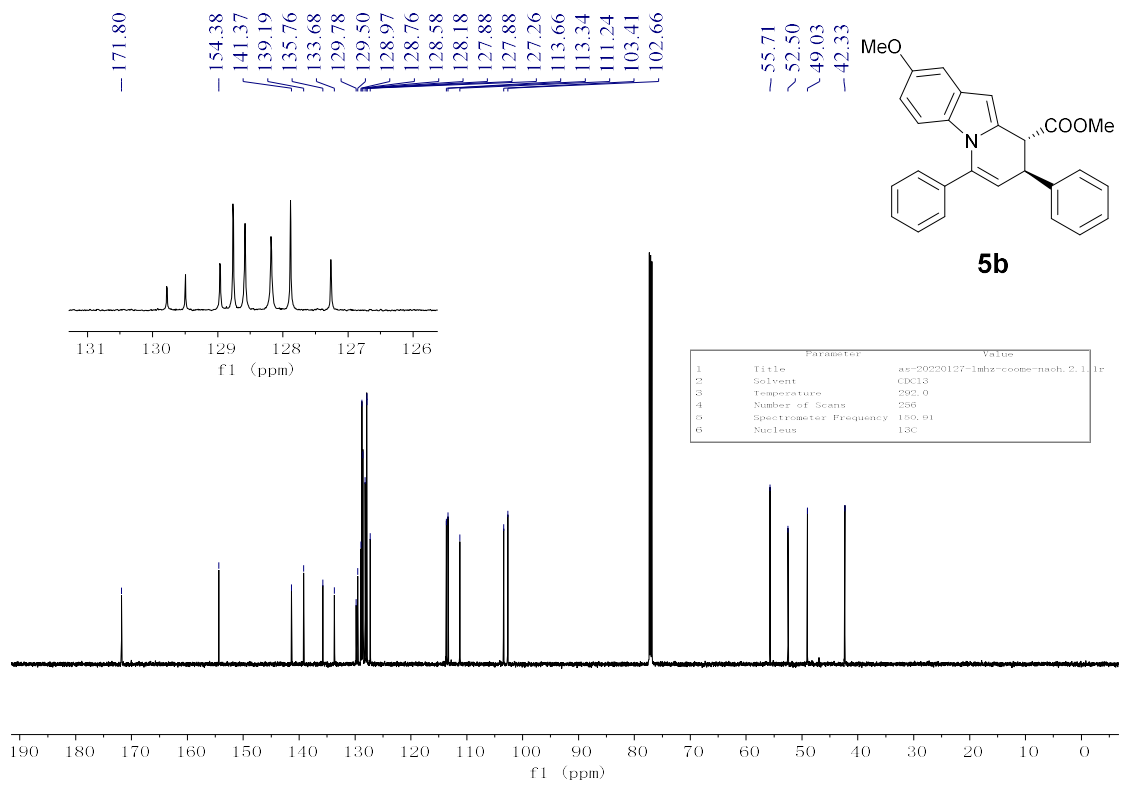



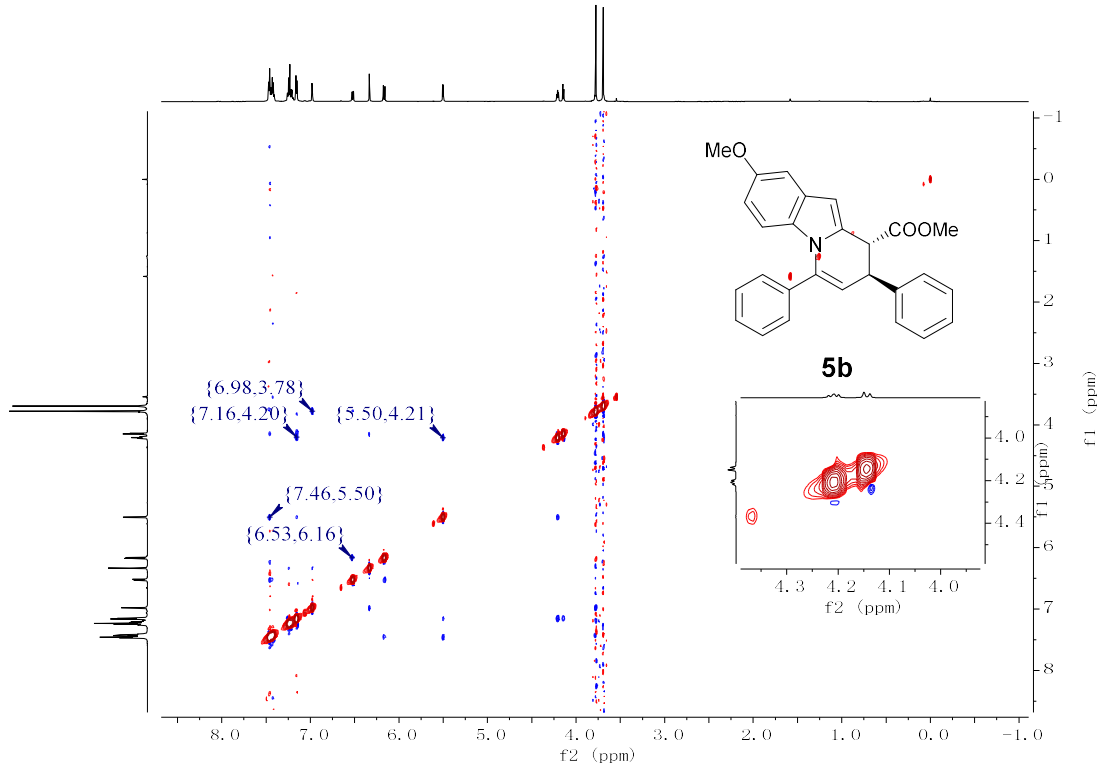

6a

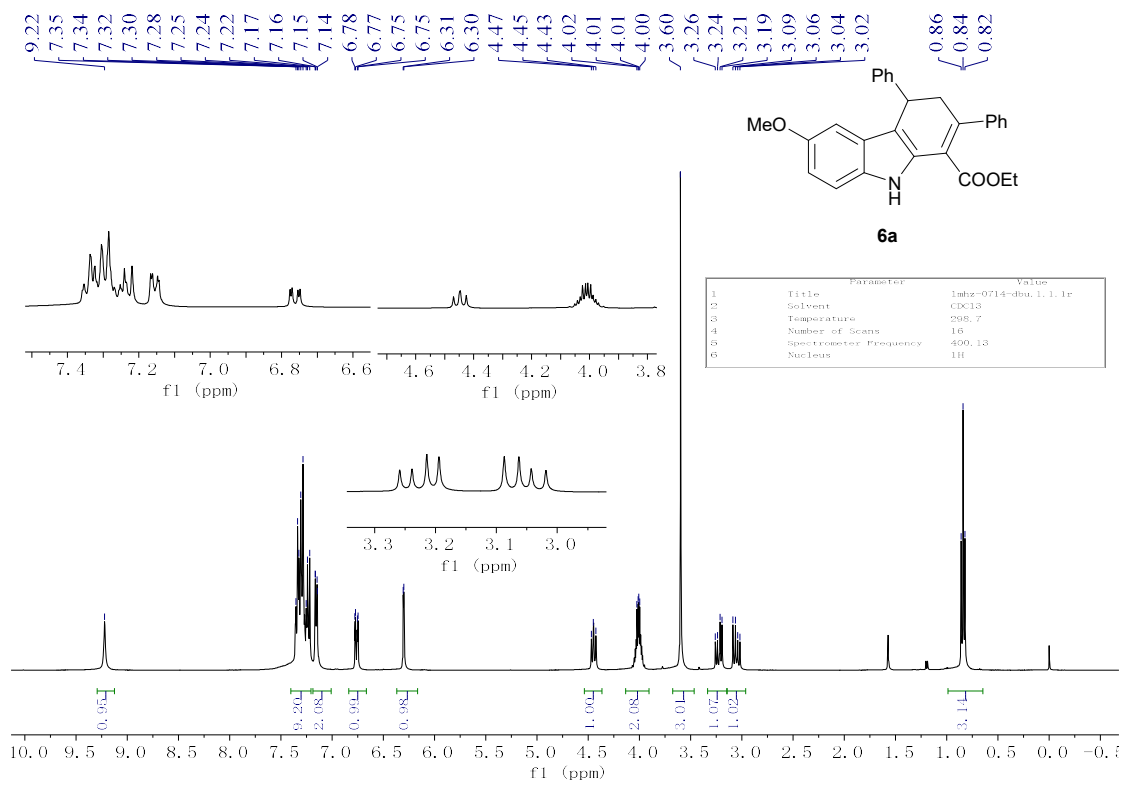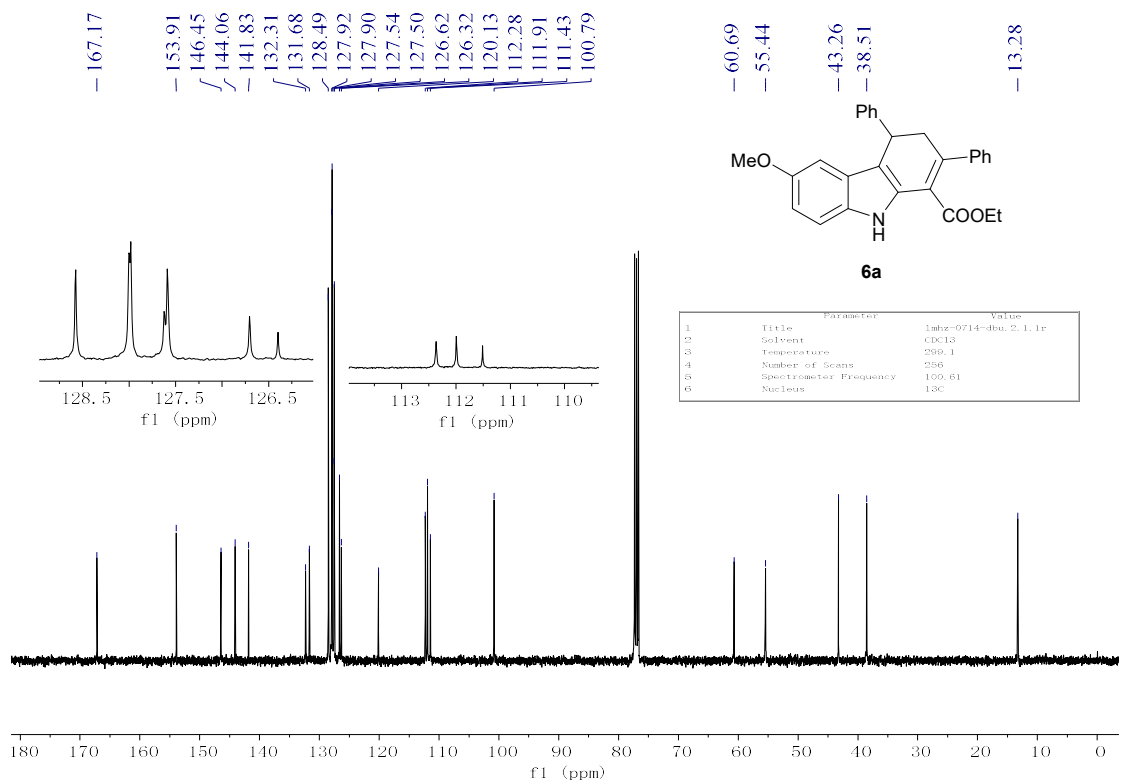

### Control experiment NMR:

1h:1% yield

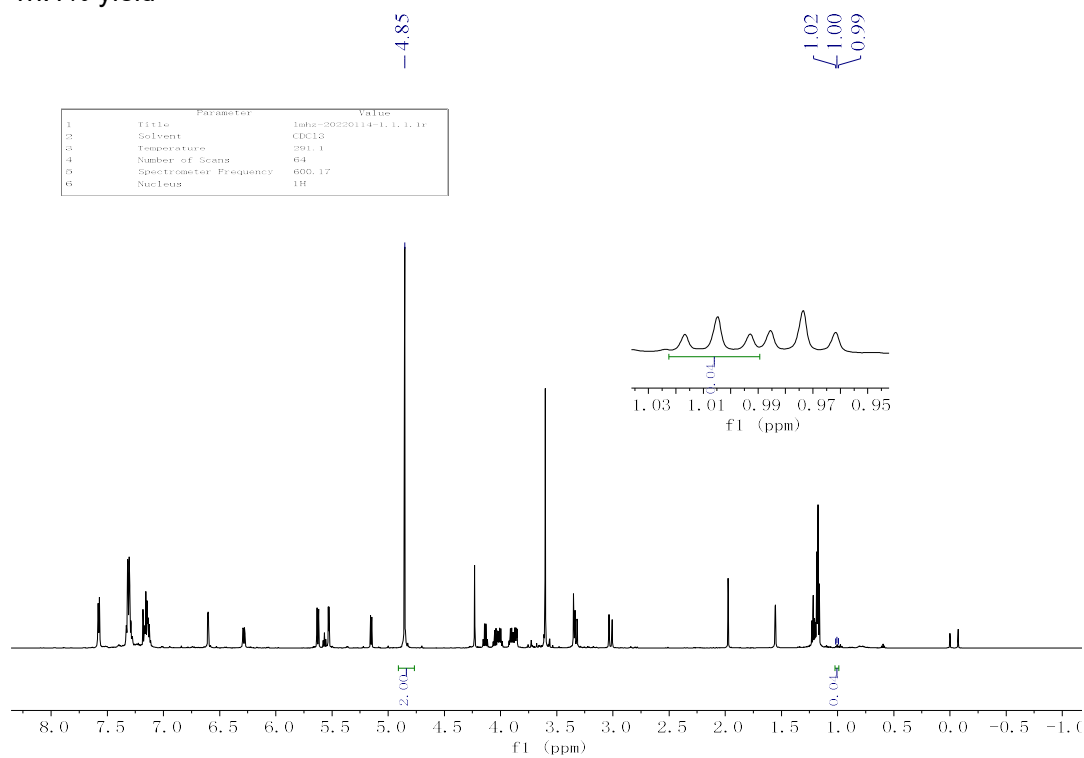

2h:1% yield

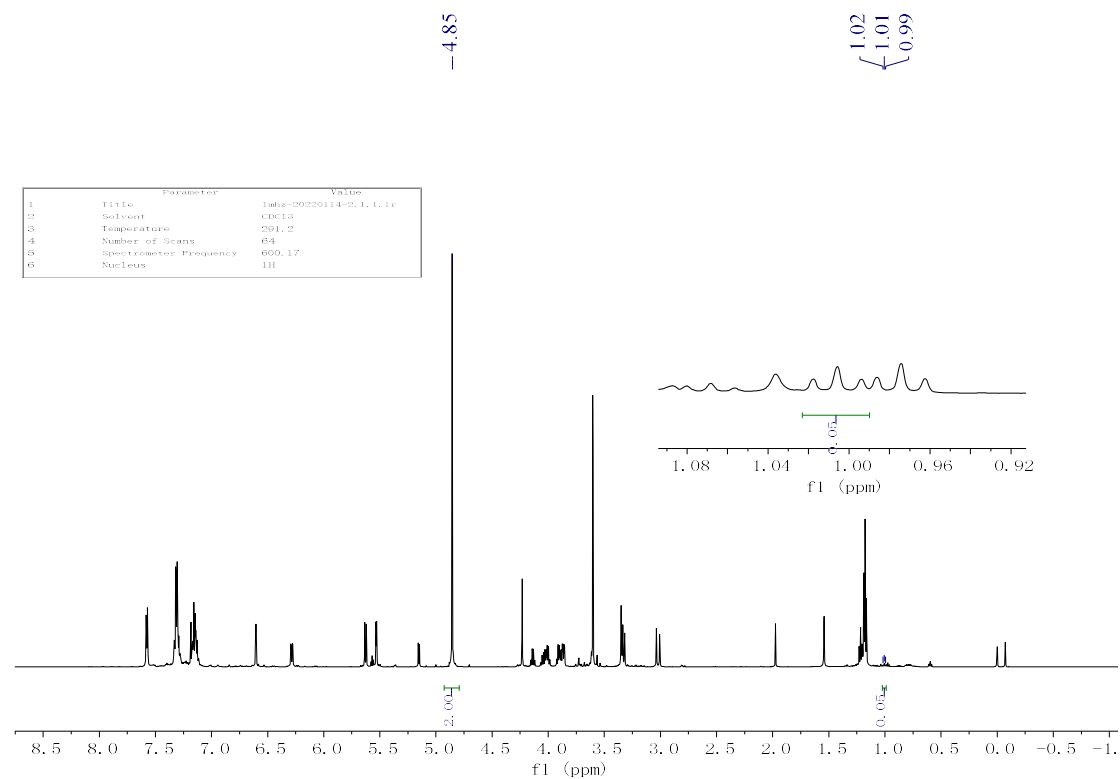

3h:1% yield

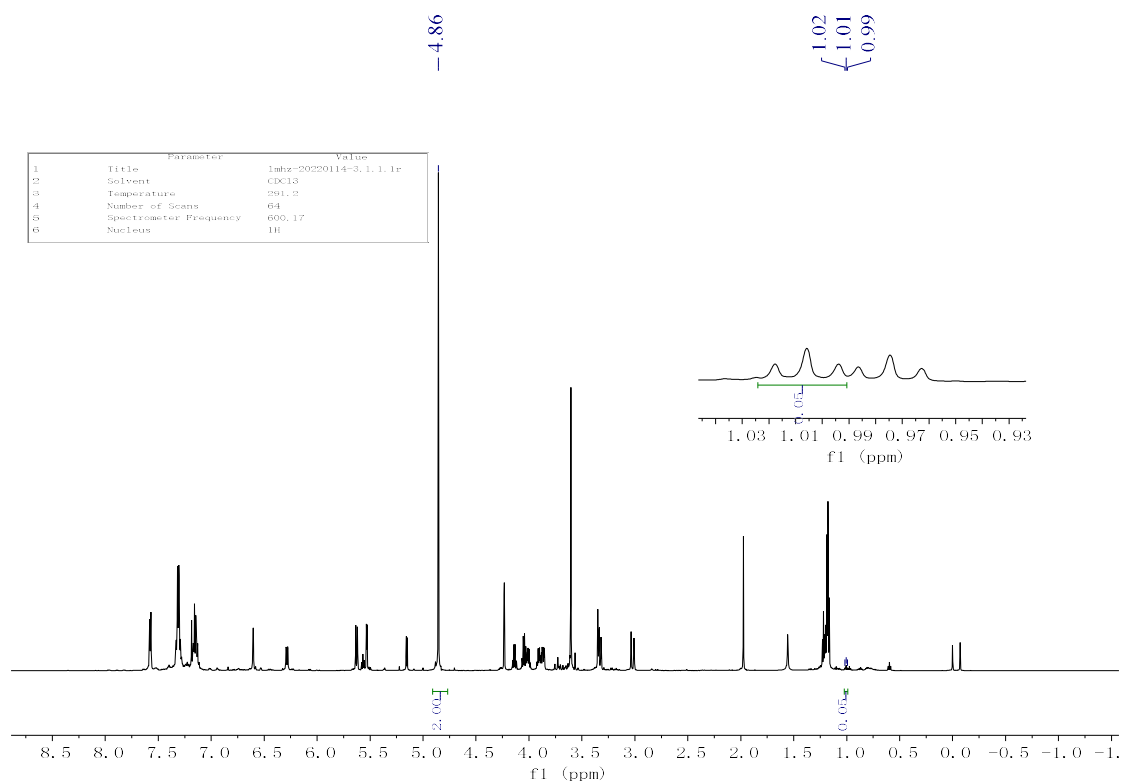

4h:9% yield

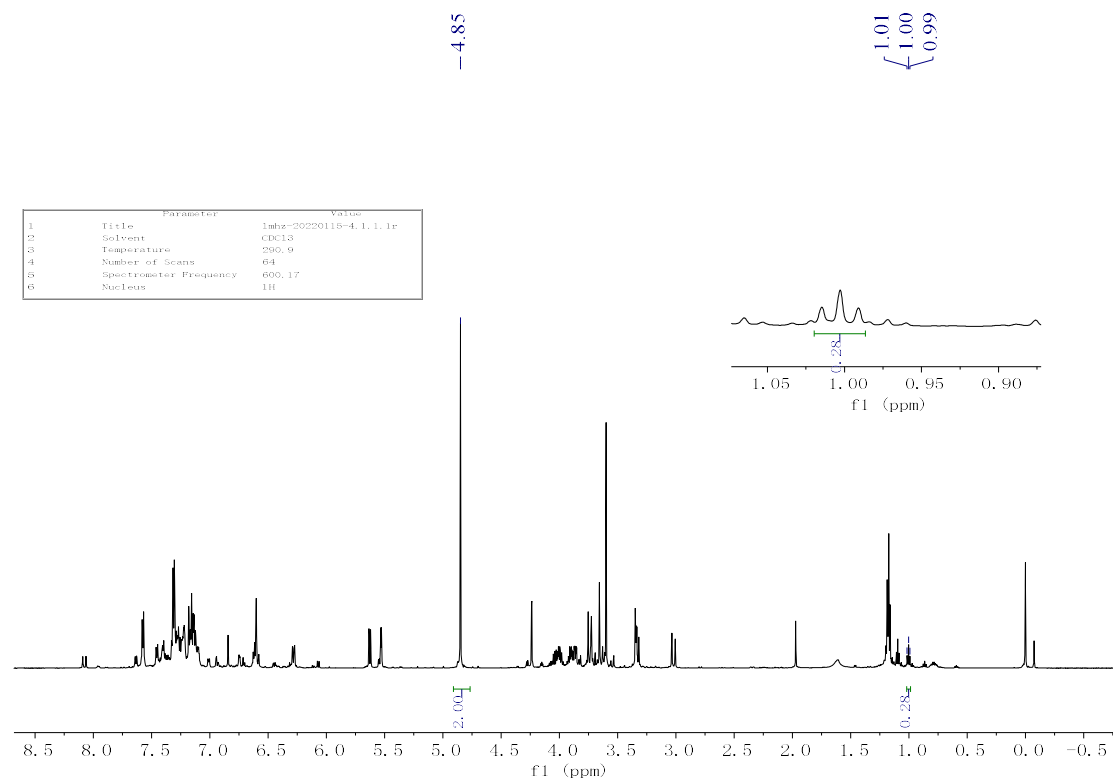

5h:14% yield

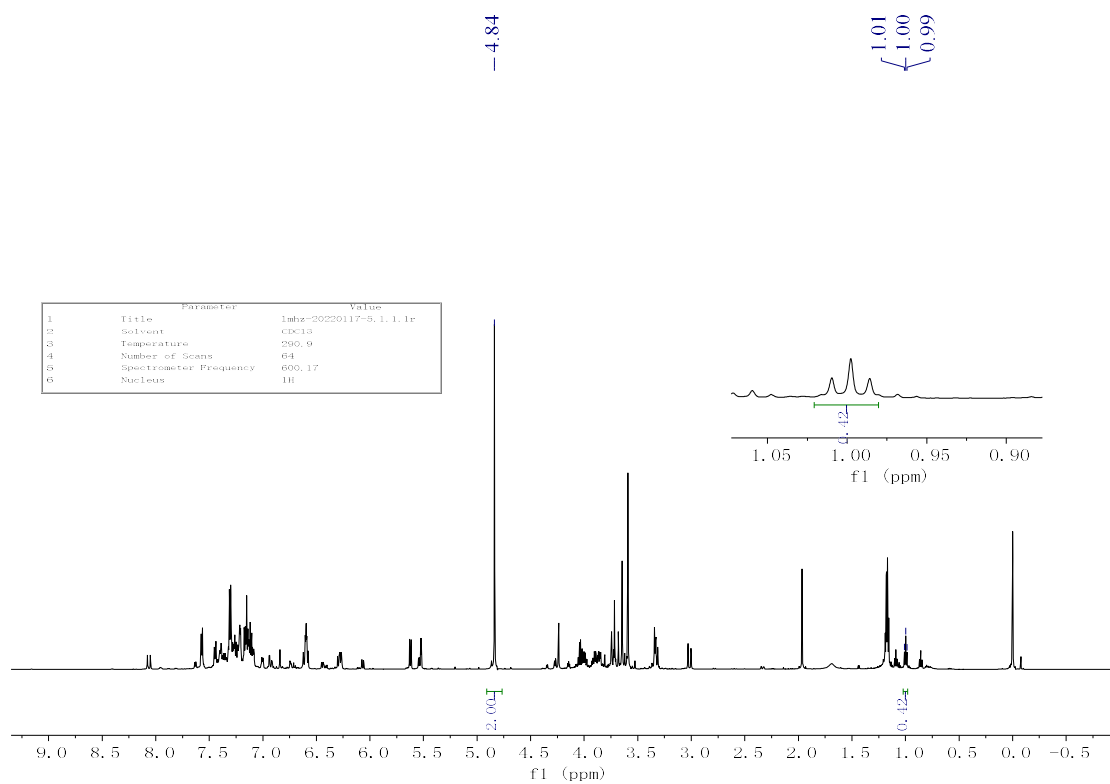

### 13. Copies of CD spectra for products

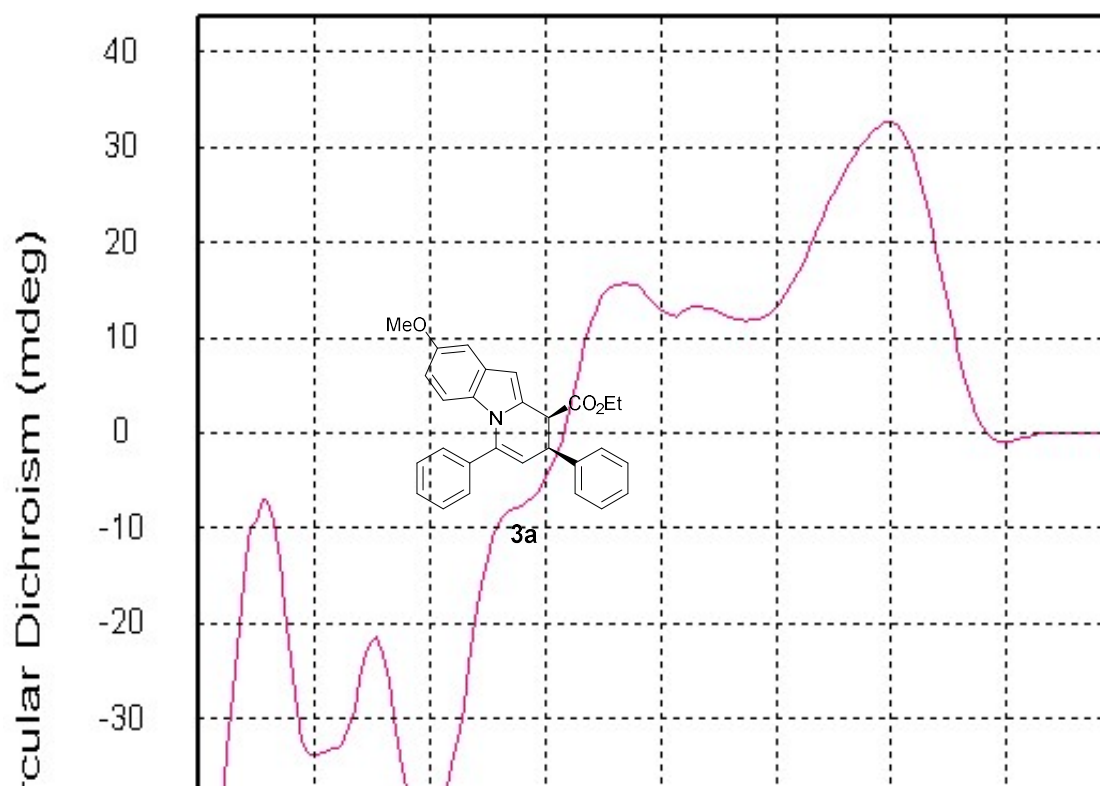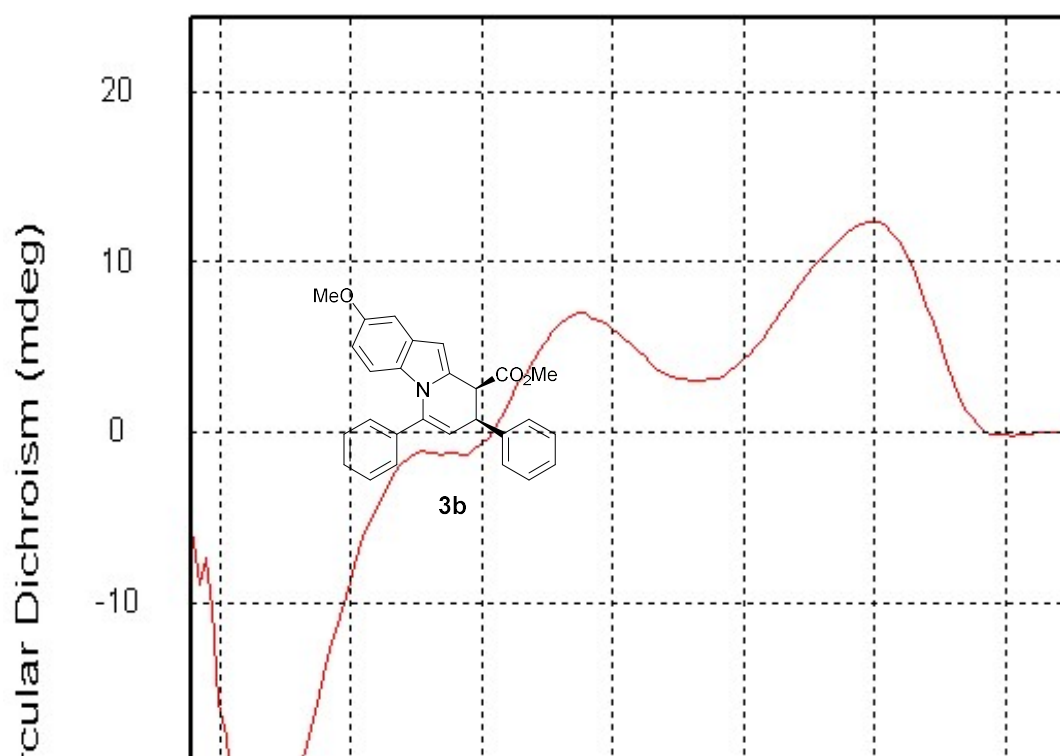

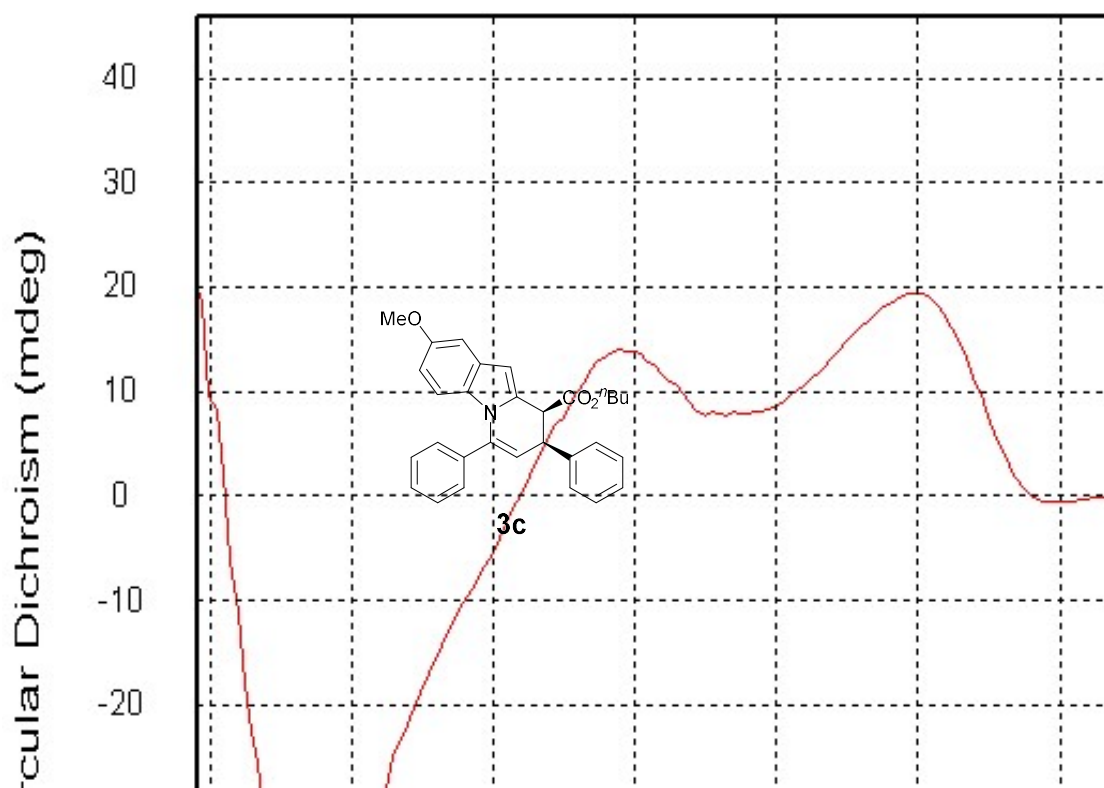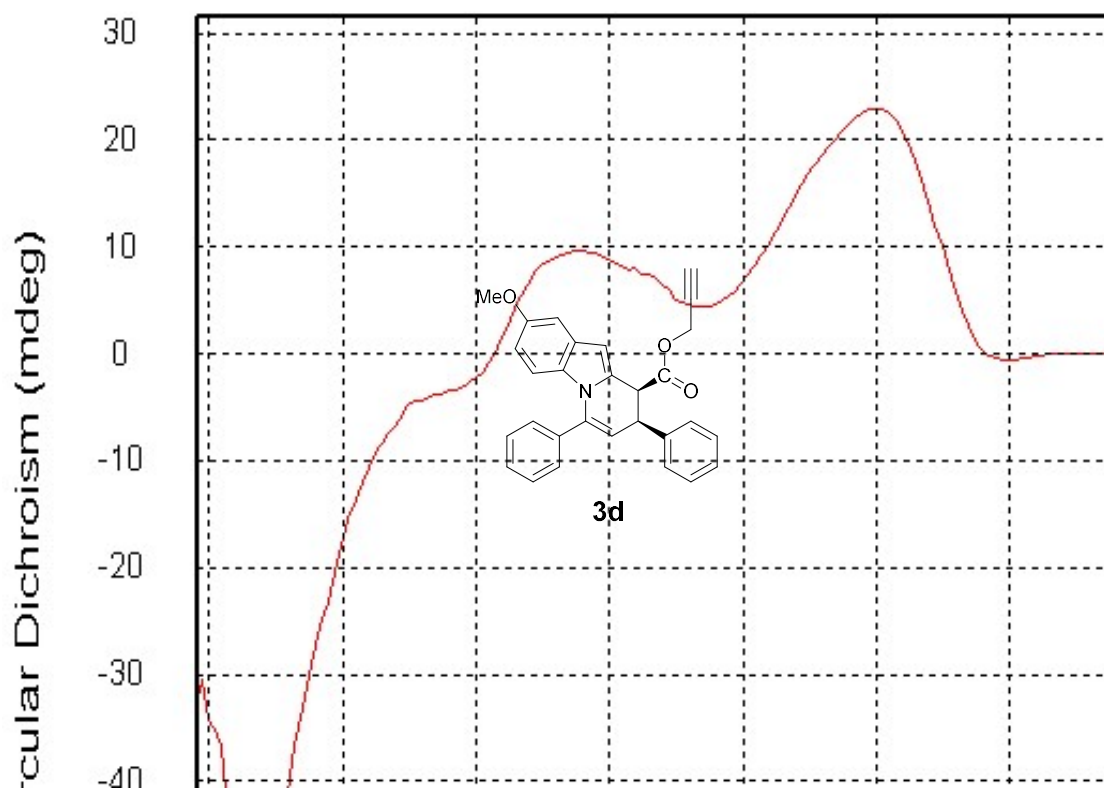

circular Dichroism (mdeg)

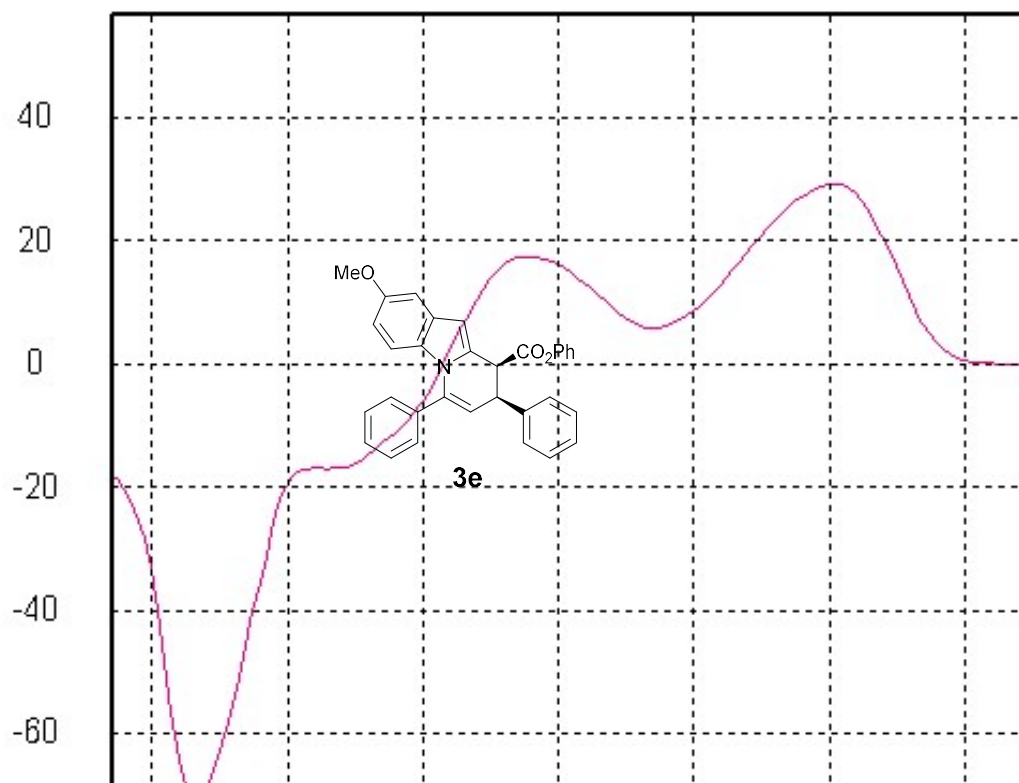

circular Dichroism (mdeg)

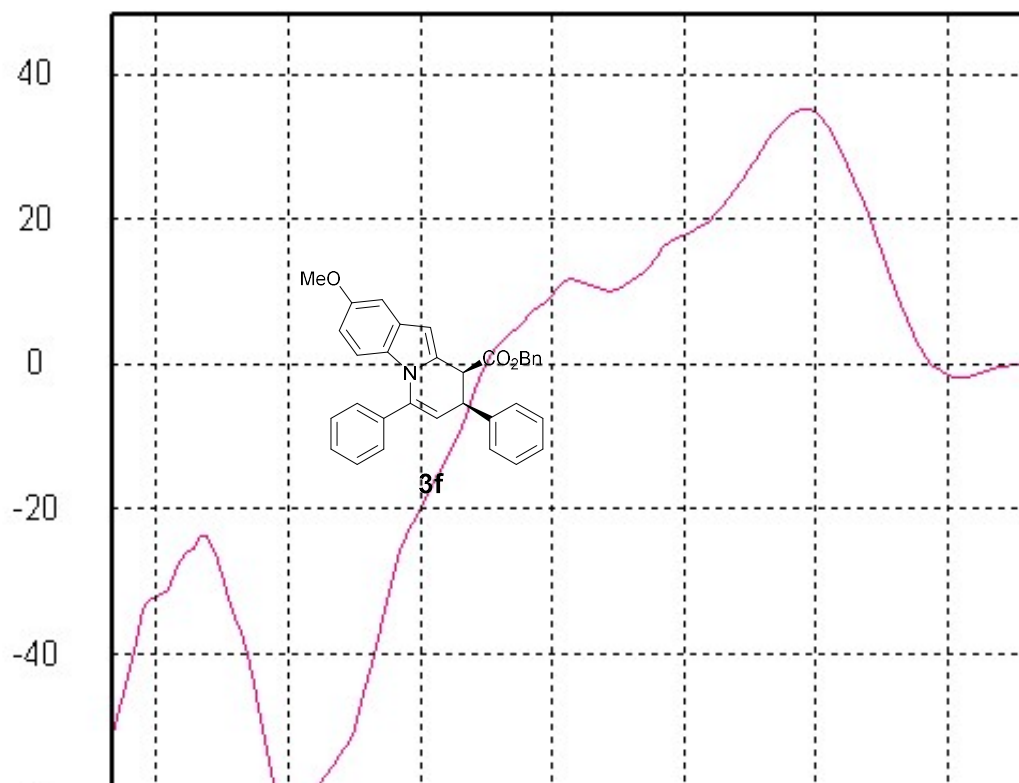



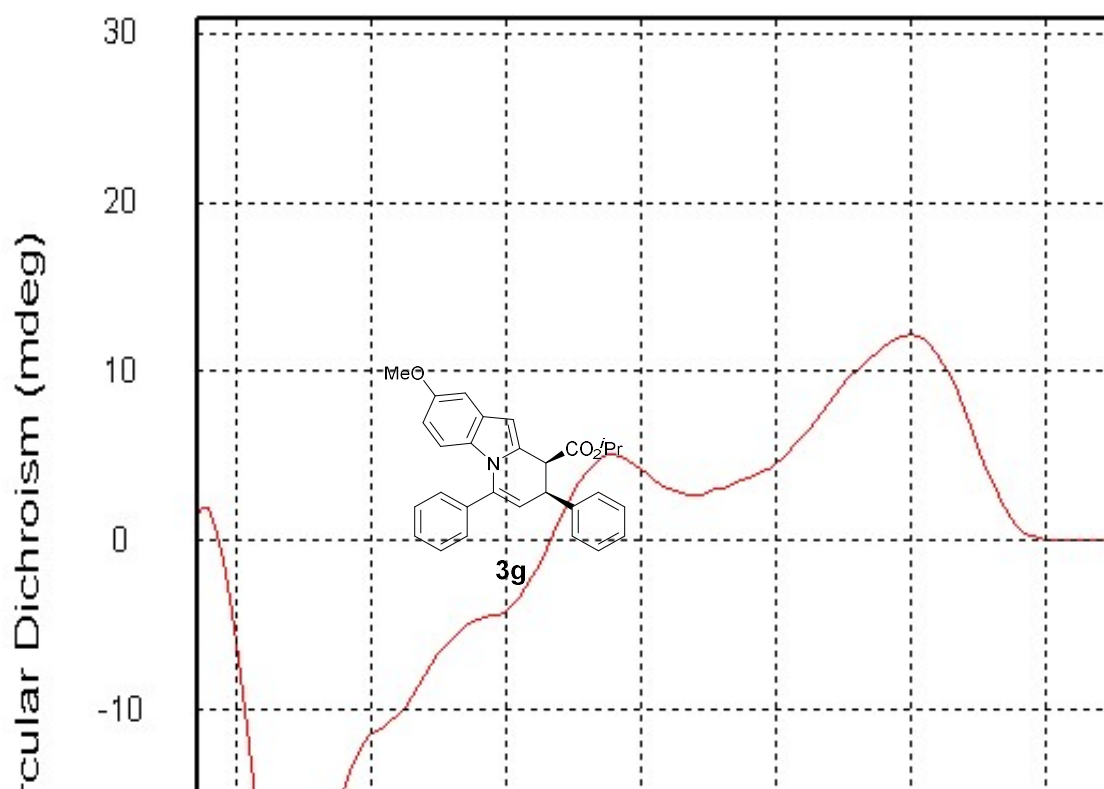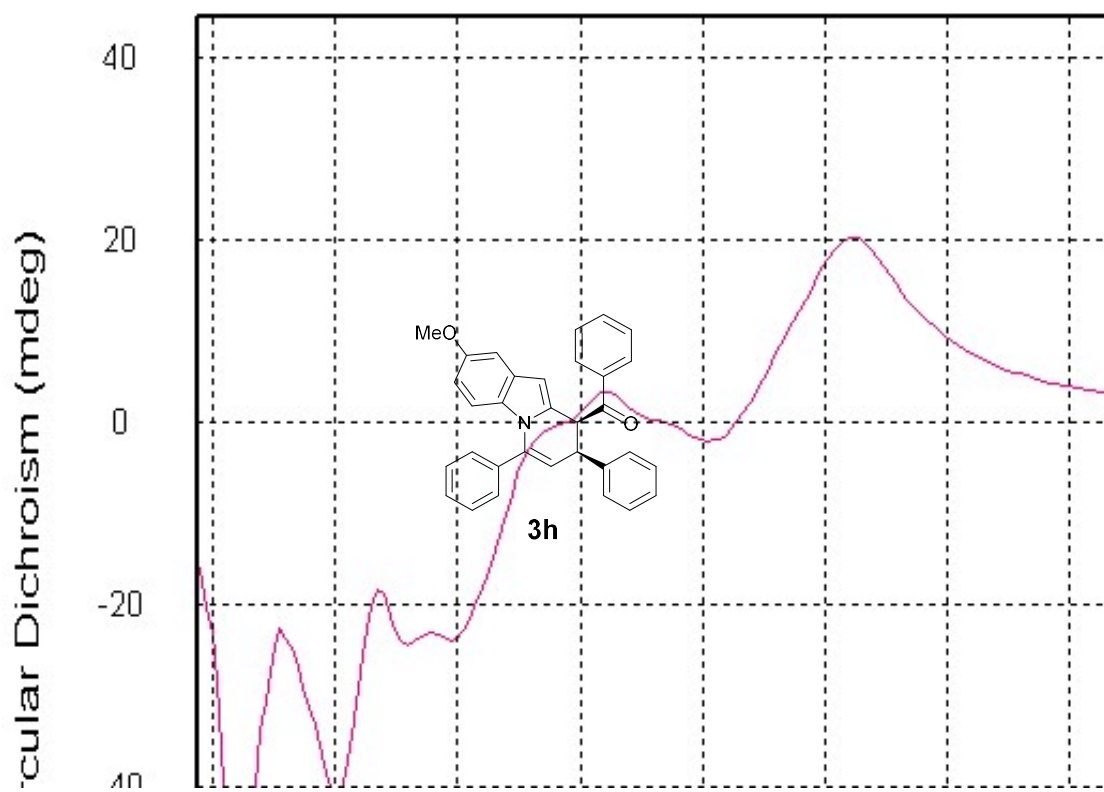

circular Dichroism (mdeg)

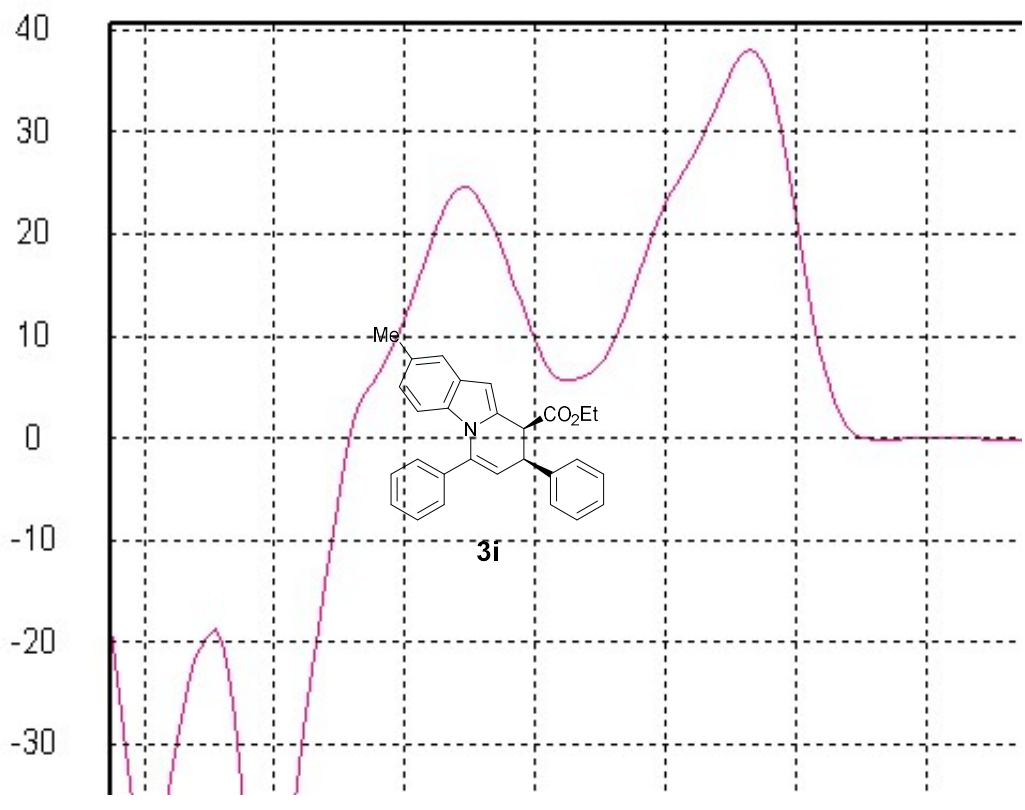

circular Dichroism (mdeg)

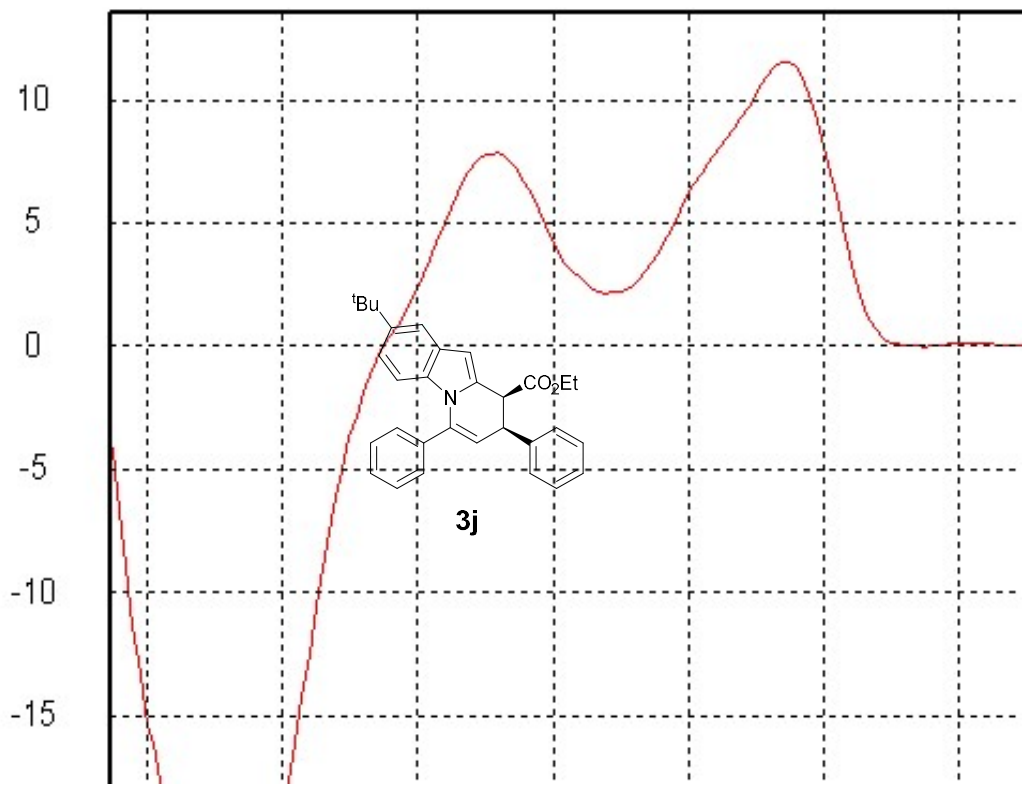

circular Dichroism (mdeg)

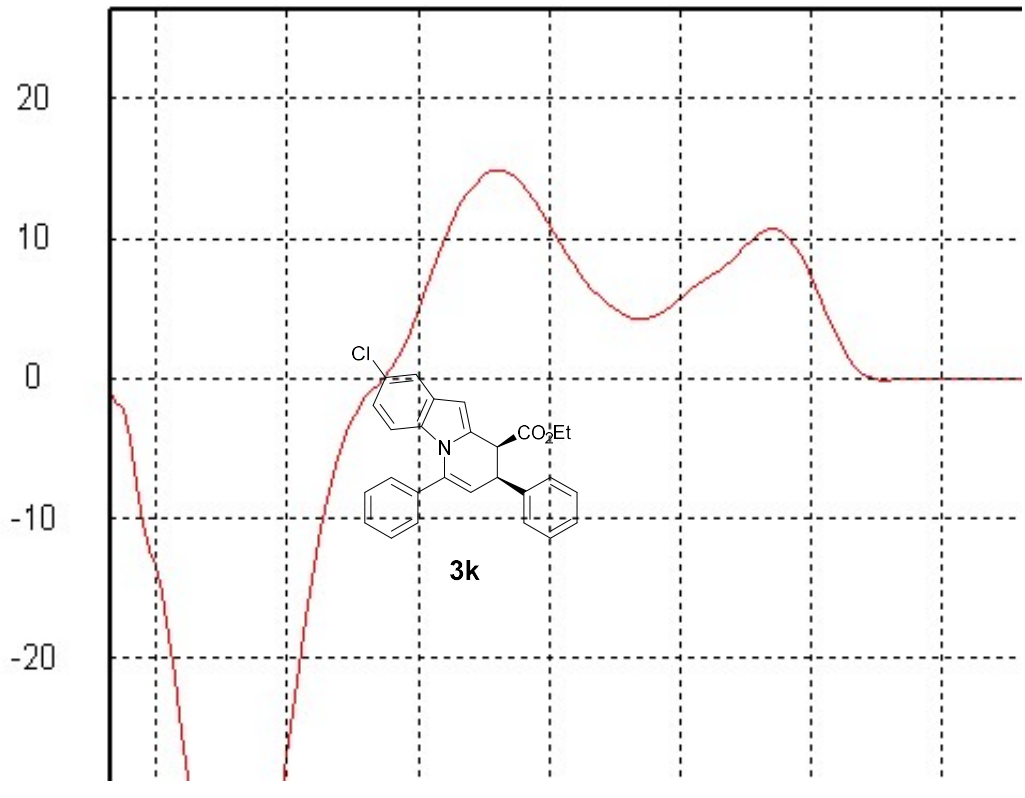

circular Dichroism (mdeg)

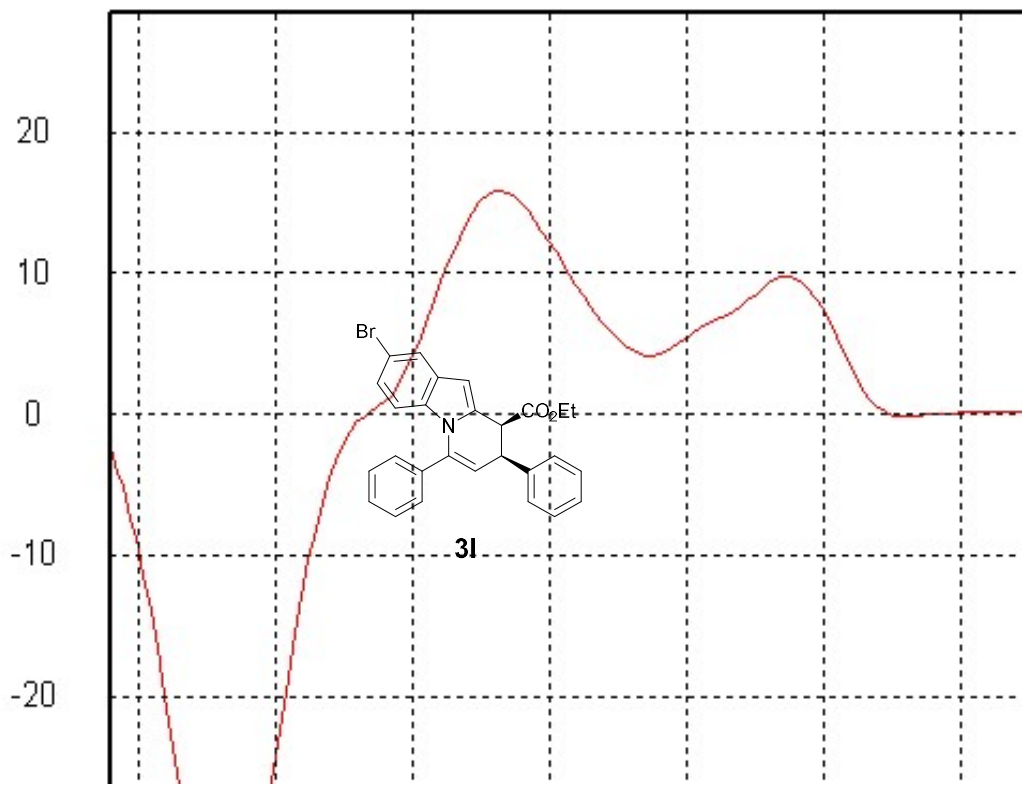

circular Dichroism (mdeg)

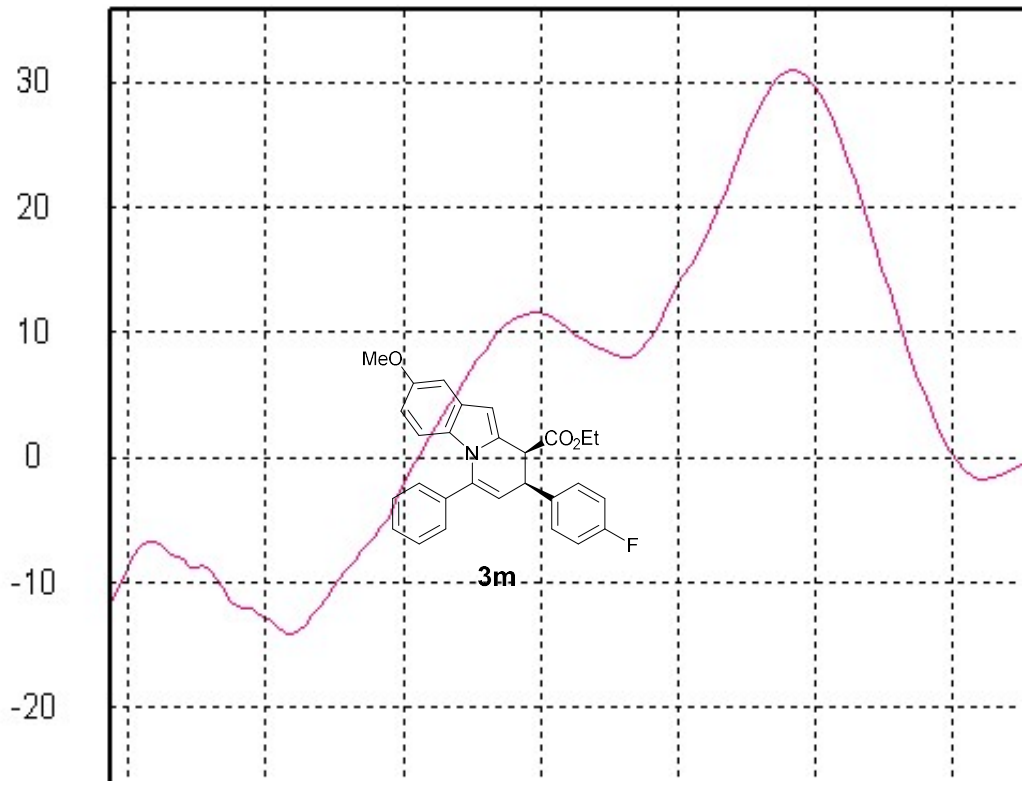

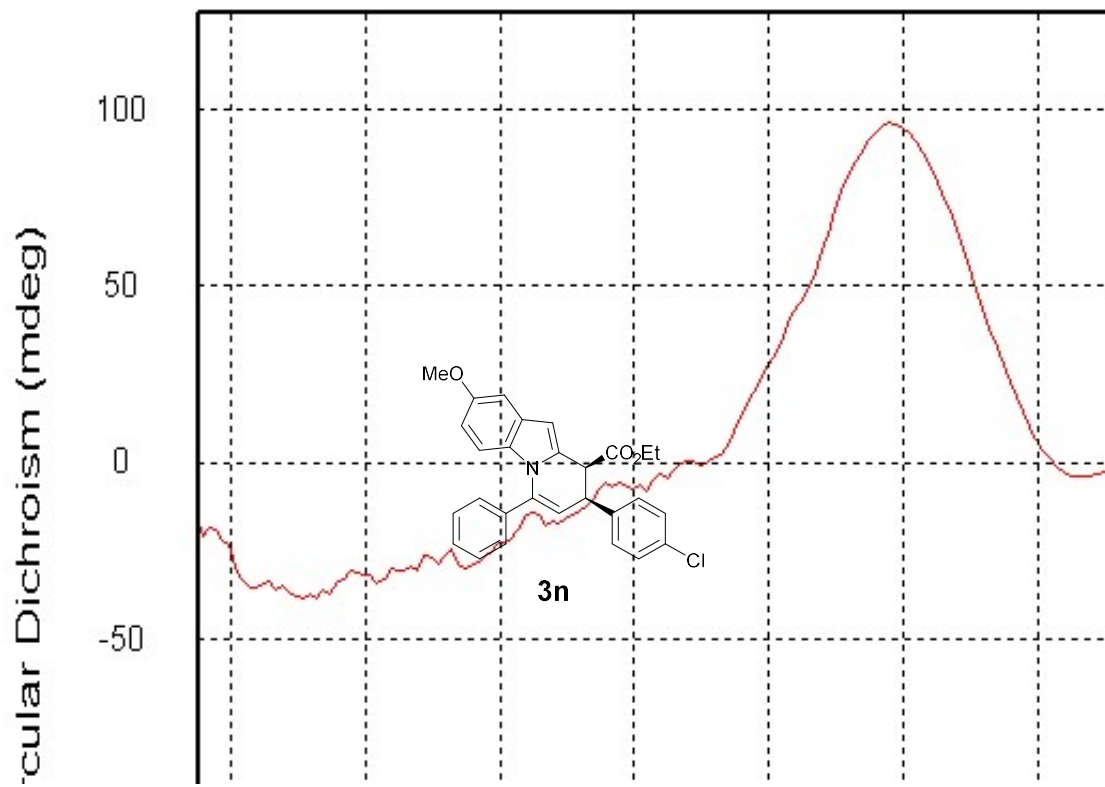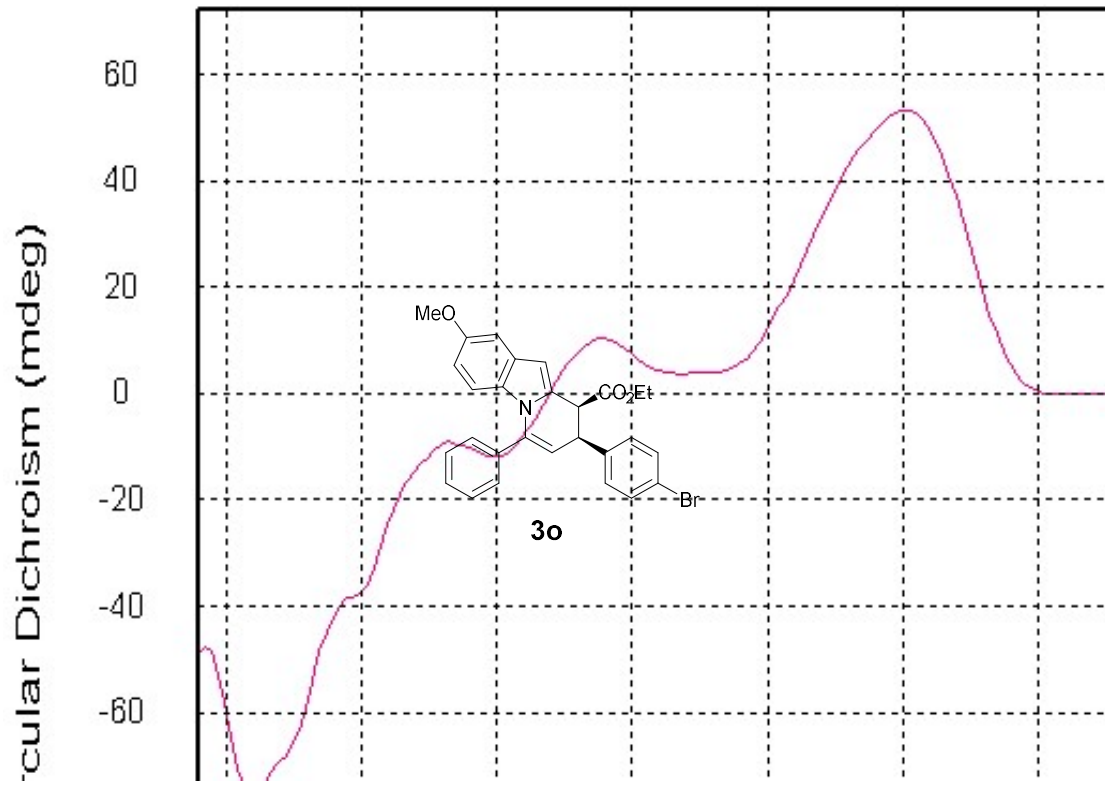

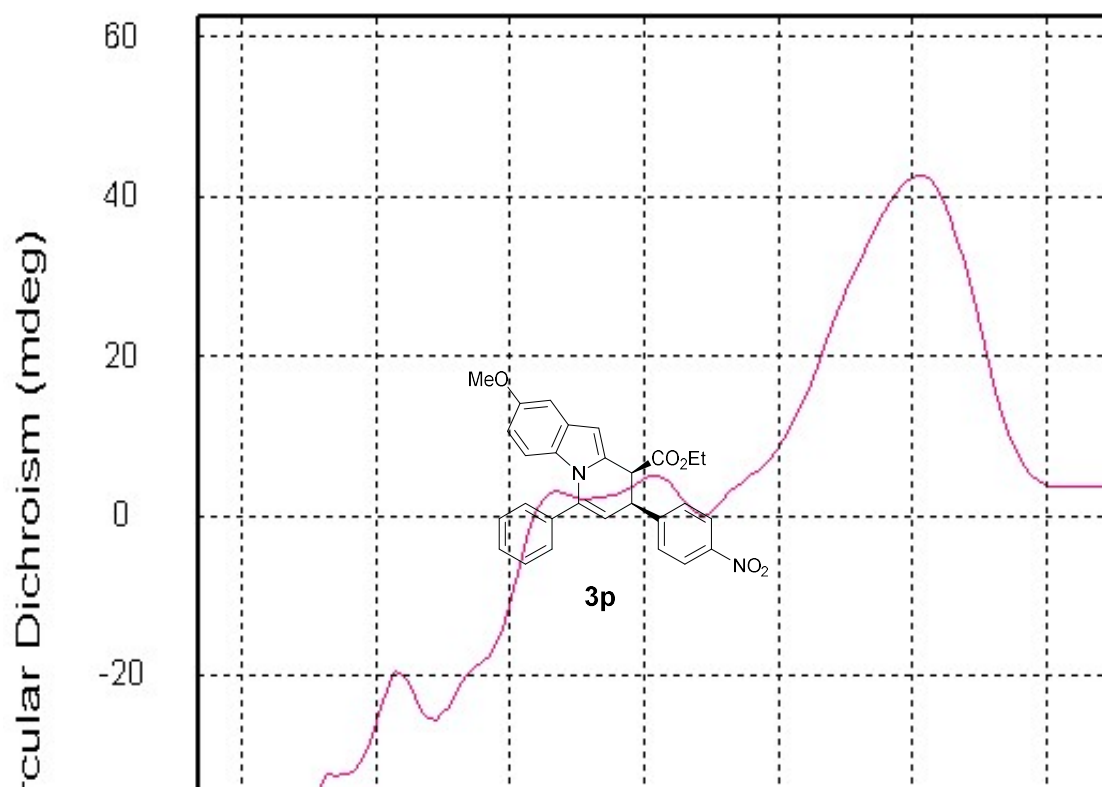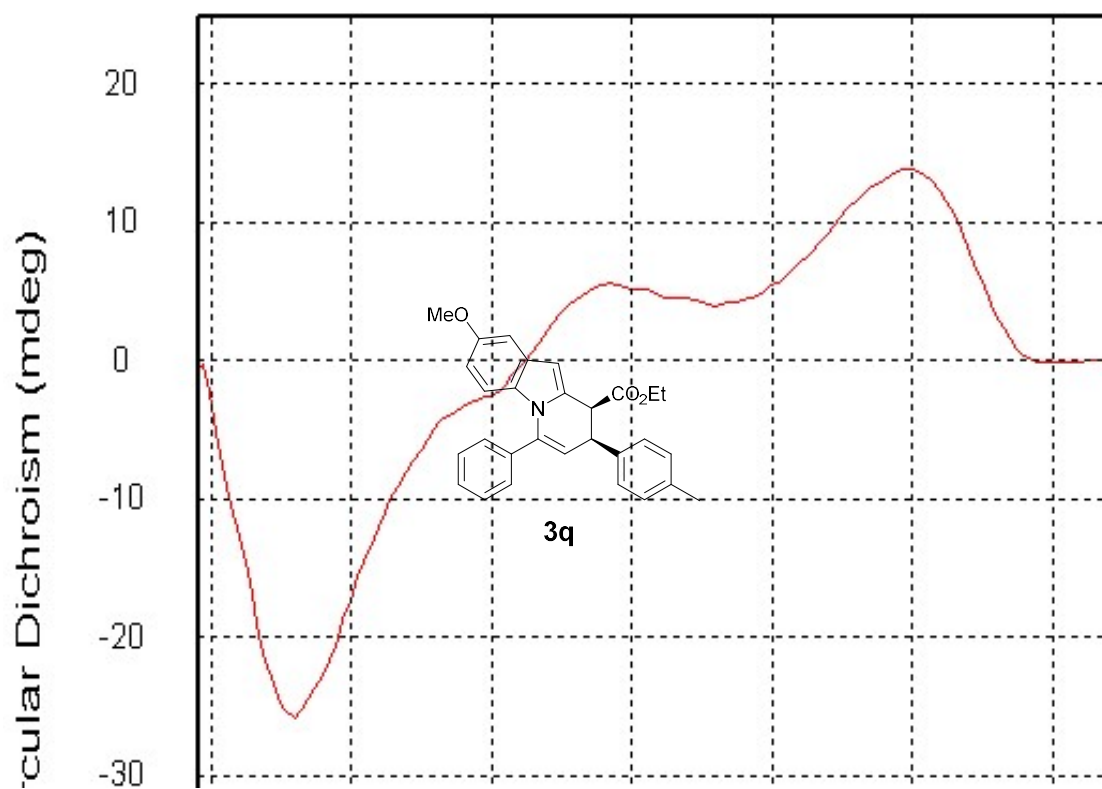

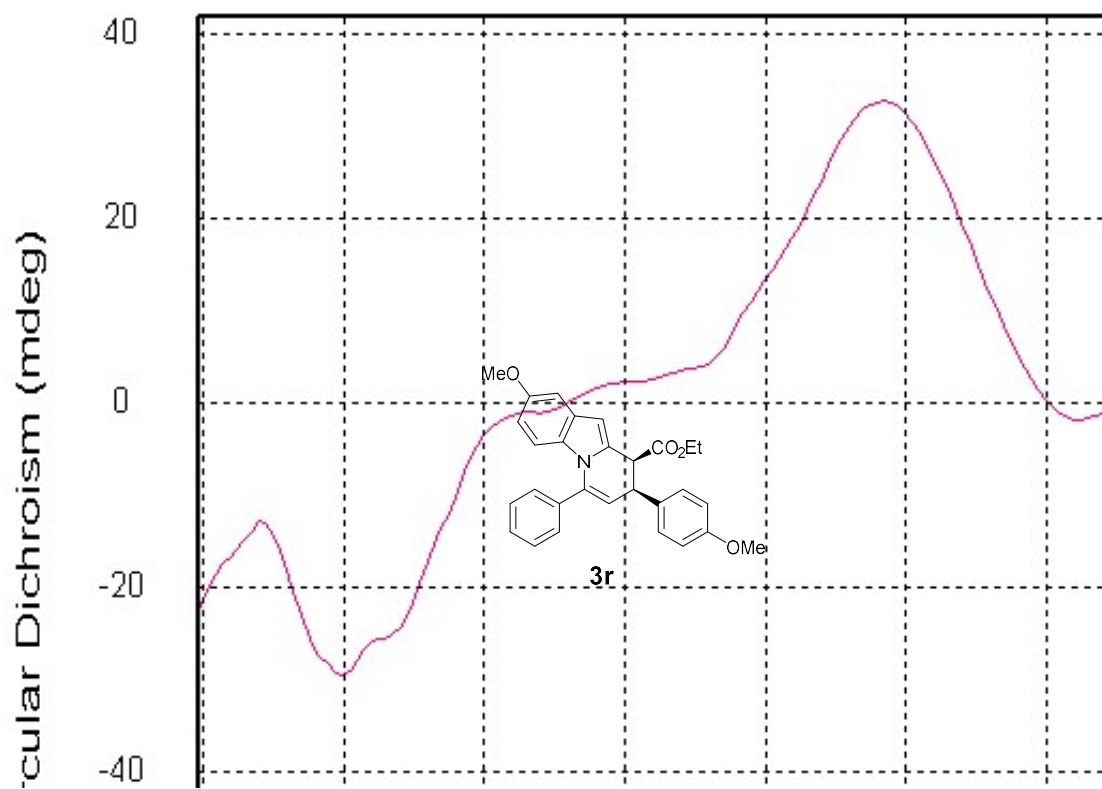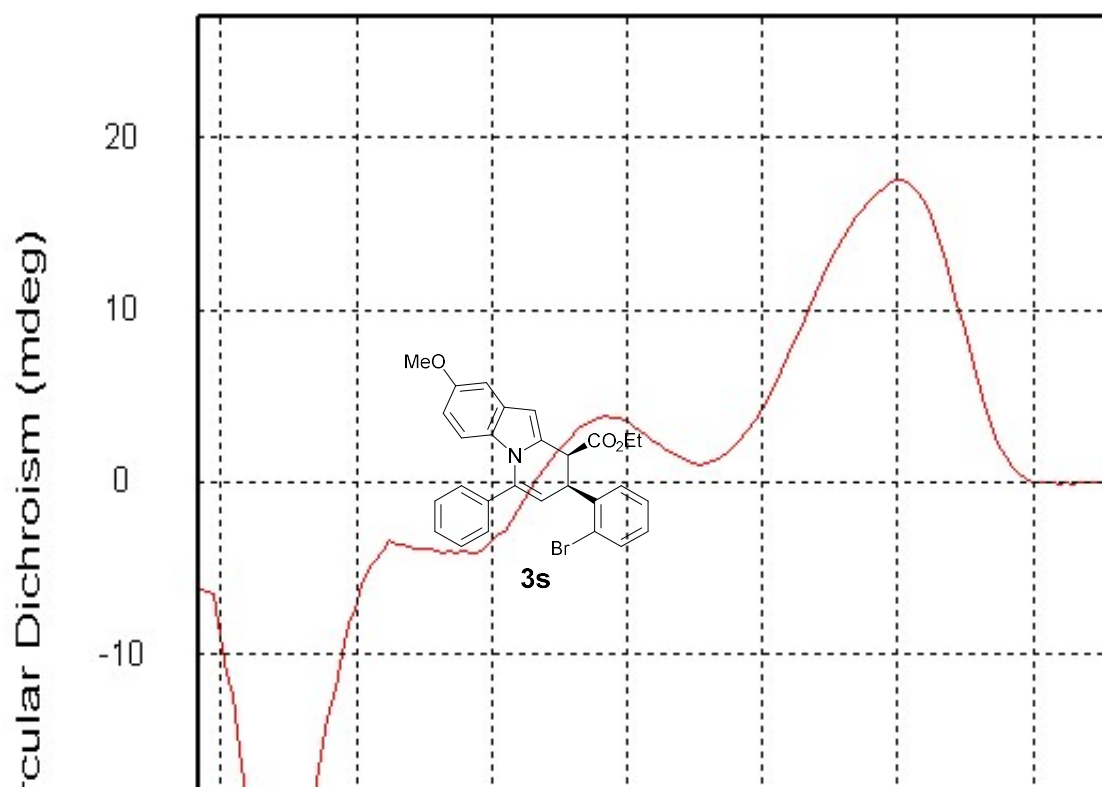

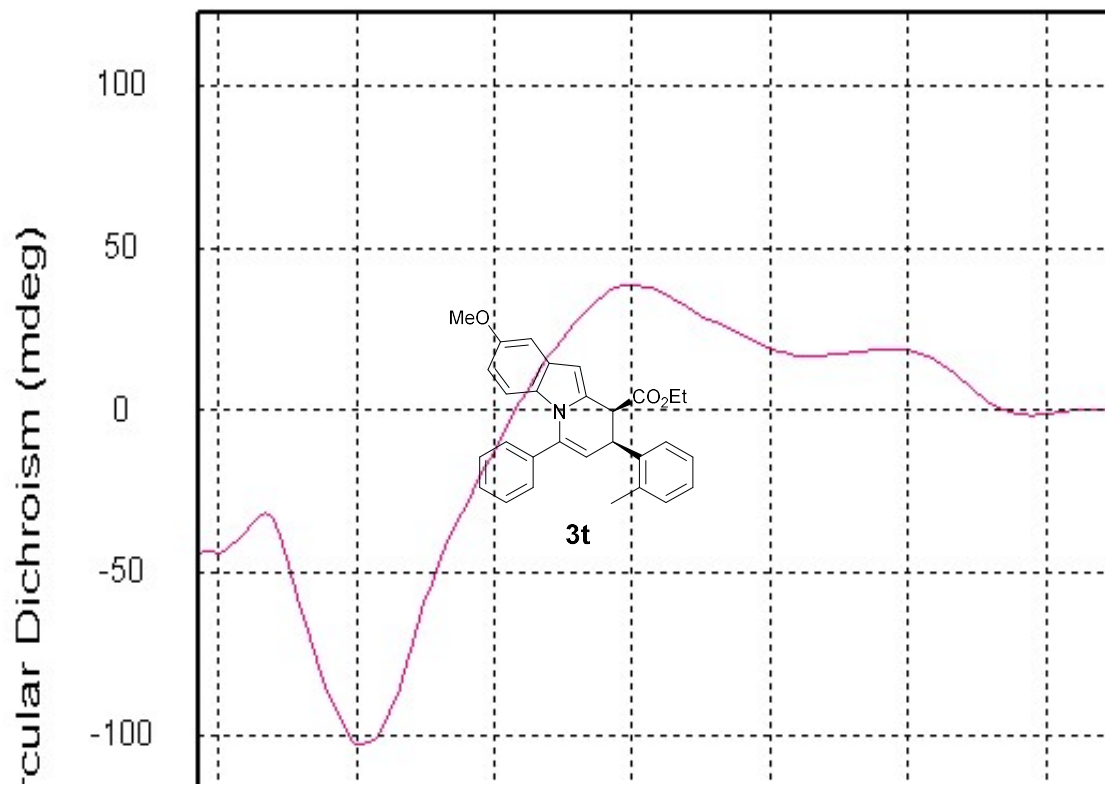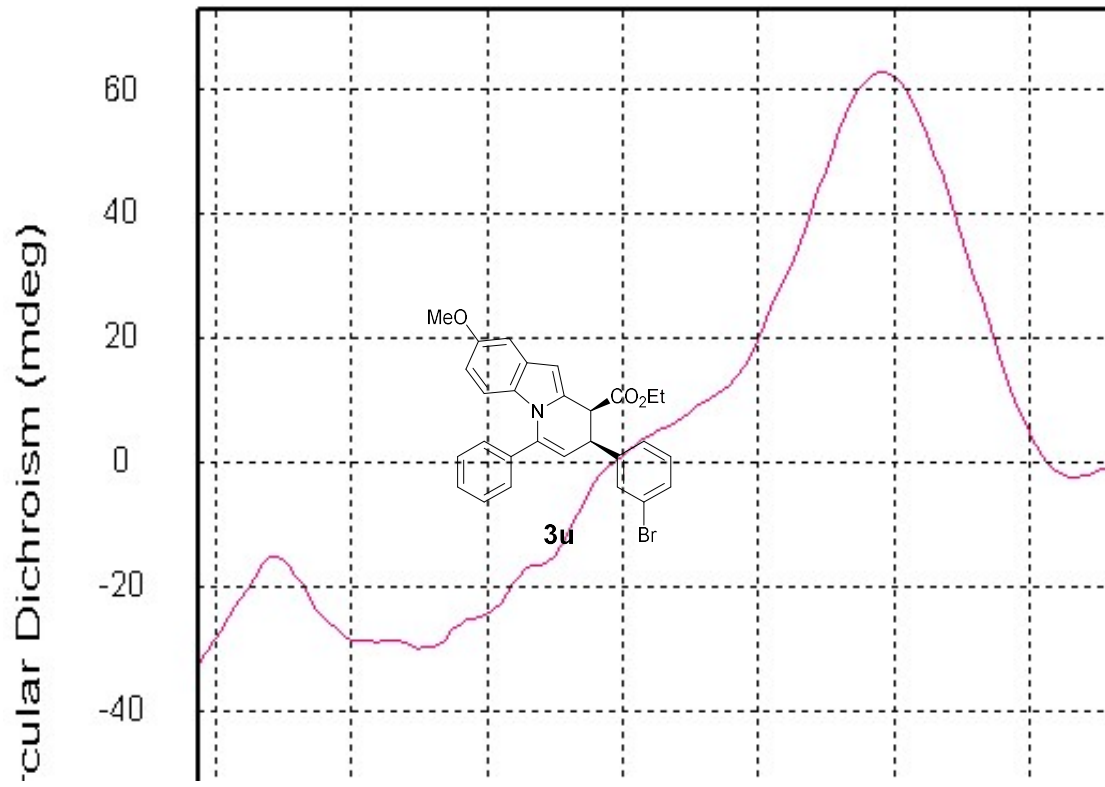



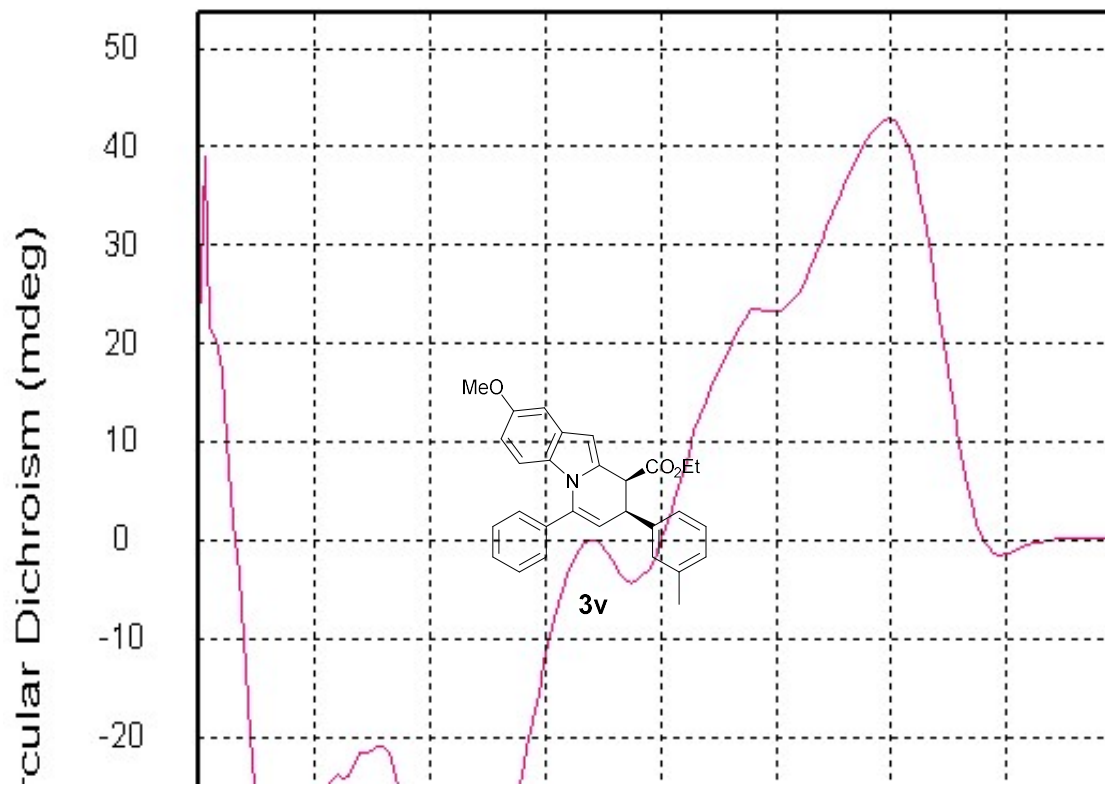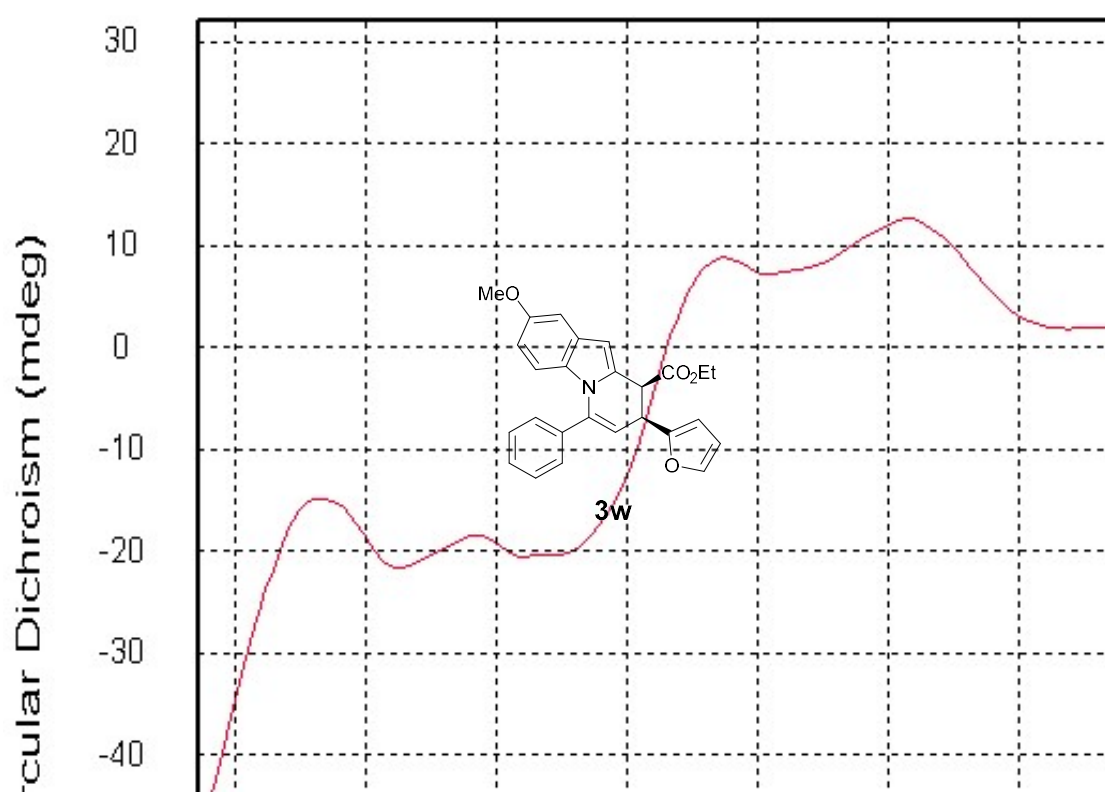

circular Dichroism (mdeg)

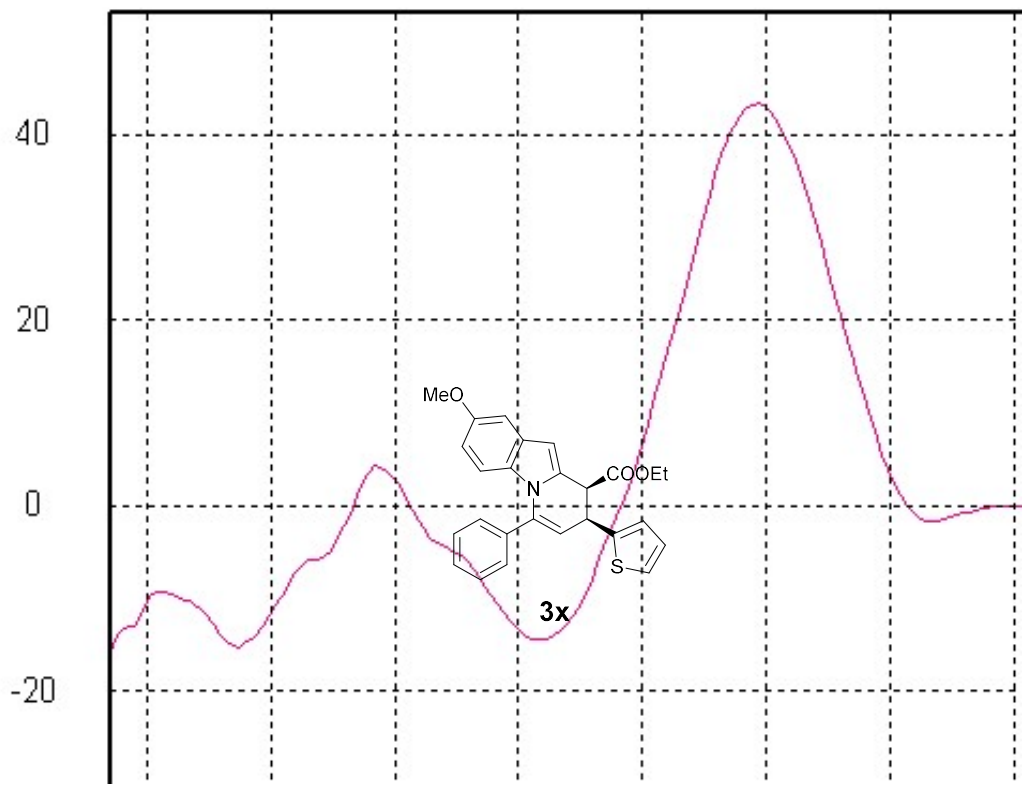

circular Dichroism (mdeg)

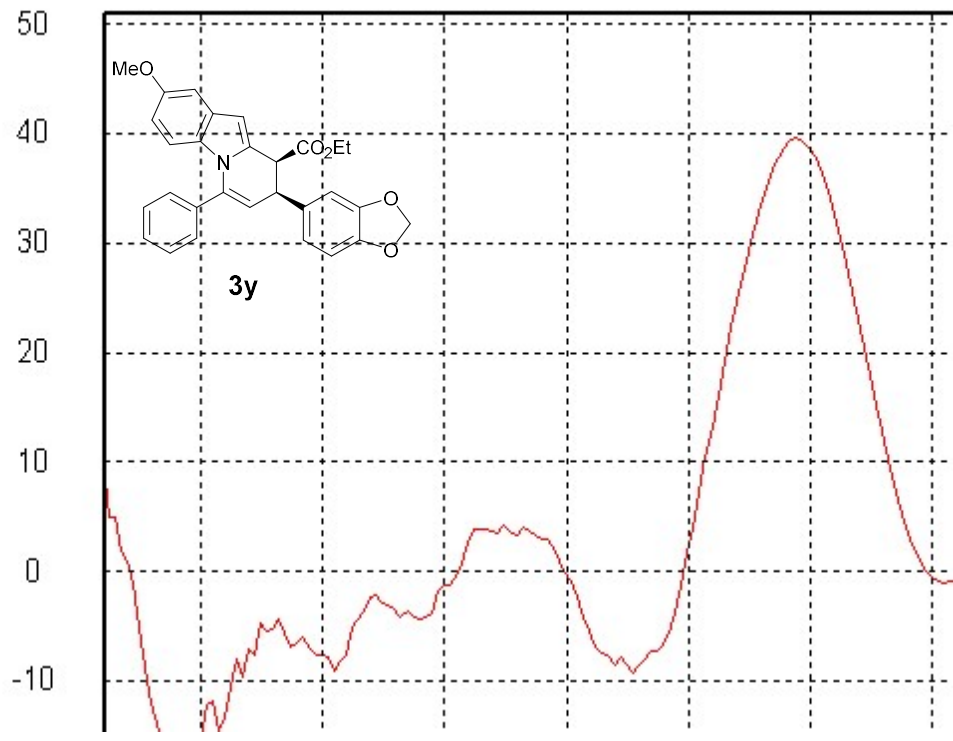

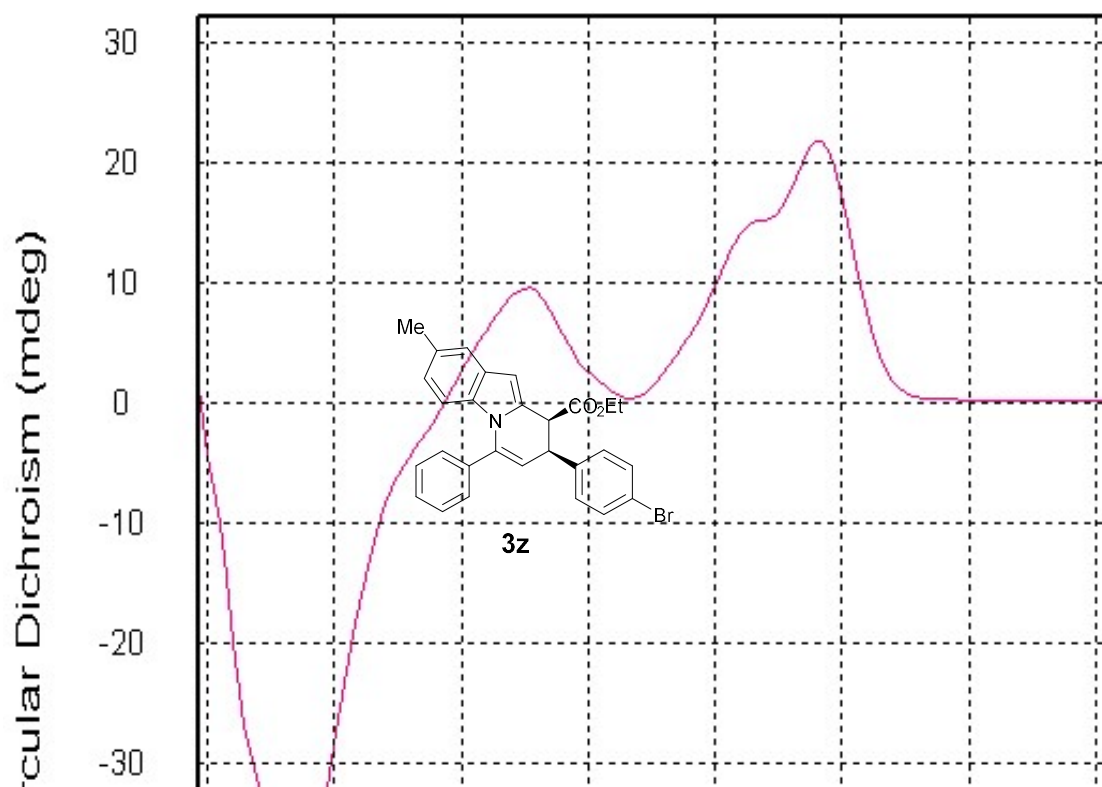

Supplement: d2cc01263d1.pdf [file d2cc01263d1.pdf]
